# Supplementary material for: Facile aerobic photooxidation of methyl group in the aromatic nucleus in the presence of an organocatalyst under VIS irradiation
Source: Royal Society of Chemistry journal article supplement (doi:10.1039/c1gc15154a), 2011-01-01

## Supplementary Information

# Facile Aerobic Photooxidation of Methyl Group in the Aromatic Nucleus in the Presence of an Organocatalyst under VIS Irradiation

Norihiro Tada, Kasumi Hattori, Tomoya Nobuta, Tsuyoshi Miura, and Akichika Itoh\*

*Laboratory of Pharmaceutical Synthetic Chemistry, Faculty of Pharmaceutical Science,  
Gifu Pharmaceutical University, 1-25-4 Daigaku-nishi, Gifu 501-1196, Japan*

*E-mail: itoha@gifu-pu.ac.jp*

|     |                                                                                                                                  |       |
|-----|----------------------------------------------------------------------------------------------------------------------------------|-------|
| 1.  | General Information                                                                                                              | SI-2  |
| 2.  | Facile Aerobic Photooxidation of Methyl Group in the Aromatic Nucleus in the Presence of an Organocatalyst under VIS Irradiation |       |
| 2.1 | Optimization of the Reaction Conditions (Supplementary data for Table 1)                                                         | SI-2  |
| 2.2 | Optimization of the Reaction Conditions (Supplementary data for Table 2)                                                         | SI-4  |
| 2.3 | Aerobic Photooxidation under Lower Concentration of Oxygen                                                                       | SI-5  |
| 2.4 | Time Course of the Aerobic Photooxidation                                                                                        | SI-5  |
| 2.5 | Measurement of Peroxide by Iodometry                                                                                             | SI-7  |
| 2.6 | General Procedure                                                                                                                | SI-8  |
|     | Appendix: $^1\text{H}$ and $^{13}\text{C}$ NMR spectra                                                                           | SI-10 |

## 1. General Information.

All dry solvents were obtained from Kanto Kagaku Co., Ltd. Other chemicals used were of reagent grade and were obtained from Aldrich Chemical Co., Tokyo Kasei Kogyo Co., Ltd. and Wako Pure Chemical Industries, Ltd.  $^1\text{H}$  NMR and  $^{13}\text{C}$  NMR spectra were obtained on a JEOL ECA 500 spectrometer or JEOL AL 400 spectrometer or JEOL EX 400 spectrometer (500 or 400 MHz for  $^1\text{H}$  NMR and 125 or 100 MHz for  $^{13}\text{C}$  NMR). Chemical shifts ( $\delta$ ) are reported in parts per million (ppm) downfield from internal  $\text{Me}_4\text{Si}$ . Mass spectra (MS) were obtained on a JEOL JMS-SX102A instrument. Preparative thin-layer chromatography (TLC) was carried out on precoated plates of silica gel (MERCK, silica gel F-254).

## 2. Facile Aerobic Photooxidation of Methyl Group in the Aromatic Nucleus in the Presence of an Organocatalyst under VIS Irradiation

### 2.1. Optimization of the Reaction Conditions (Supplementary data for Table 1)

**Table S1.** Study of Solvent under Air

| entry           | solvent                    | yield (%) <sup>a</sup> |    |       |       | s.m. (1a) <sup>b</sup> |
|-----------------|----------------------------|------------------------|----|-------|-------|------------------------|
|                 |                            | 2a                     | 3a | 6a    | 7a    |                        |
| 1               | EtOAc                      | 85                     | 0  | 0     | 0     | 0                      |
| 2               | acetone                    | 20                     | 0  | 50    | 26    | 6                      |
| 3               | MeCN                       | 0                      | 0  | 49    | 21    | 11                     |
| 4               | MeOH                       | 0                      | 0  | 0     | 30    | 70                     |
| 5               | EtOH                       | 0                      | 0  | 0     | 28    | 72                     |
| 6               | <i>i</i> PrOH              | 0                      | 0  | 18    | 0     | 63                     |
| 7               | <i>i</i> Pr <sub>2</sub> O | 0                      | 0  | trace | trace | 92                     |
| 8               | PhH                        | 42                     | 10 | 4     | 13    | 13                     |
| 9               | hexane                     | 0                      | 0  | trace | trace | 78                     |
| 10 <sup>c</sup> | EtOAc                      | 0                      | 0  | 20    | 6     | 56                     |
| 11 <sup>d</sup> | EtOAc                      | 0                      | 0  | 0     | 0     | 100                    |

<sup>a</sup> Yields were determined by  $^1\text{H}$ -NMR. <sup>b</sup> Since the starting material is somewhat volatile, it is difficult to recover it perfectly even by careful work-up. <sup>c</sup> Under  $\text{N}_2$ . <sup>d</sup> In the dark.

**Table S2.** Study of Catalyst under Air

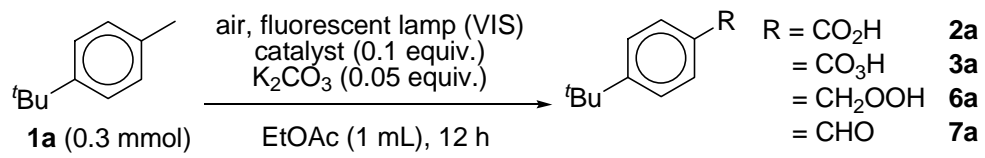

$\text{1a (0.3 mmol)}$   $\xrightarrow[\text{EtOAc (1 mL), 12 h}]{\text{air, fluorescent lamp (VIS), catalyst (0.1 equiv.), K}_2\text{CO}_3 \text{ (0.05 equiv.)}}$   $\text{4-tert-butylbenzoic acid (R)}$

$\text{R} = \text{CO}_2\text{H}$  **2a**  
 $\text{R} = \text{CO}_3\text{H}$  **3a**  
 $\text{R} = \text{CH}_2\text{OOH}$  **6a**  
 $\text{R} = \text{CHO}$  **7a**

| entry | catalyst                | yield (%) <sup>a</sup> |           |           |           |                             |
|-------|-------------------------|------------------------|-----------|-----------|-----------|-----------------------------|
|       |                         | <b>2a</b>              | <b>3a</b> | <b>6a</b> | <b>7a</b> | <b>s.m.(1a)<sup>b</sup></b> |
| 1     | AQN                     | 29                     | 0         | 14        | 5         | 32                          |
| 2     | 2-Me-AQN                | 54                     | 0         | 11        | 3         | 19                          |
| 3     | 2- <sup>t</sup> Bu-AQN  | 78                     | 0         | 7         | 3         | 8                           |
| 4     | AQN-2-CO <sub>2</sub> H | 6                      | 0         | 7         | 3         | 68                          |
| 5     | 2-Cl-AQN                | 85                     | 0         | 0         | 0         | 0                           |
| 6     | 1-Cl-AQN                | 33                     | 0         | 7         | 4         | 49                          |
| 7     | DCA                     | 0                      | 0         | 0         | 0         | 100                         |
| 8     | anthracene              | 0                      | 0         | 3         | 0         | 80                          |
| 9     | benzophenone            | 0                      | 0         | 0         | 0         | 96                          |
| 10    | Rose bengal             | 0                      | 0         | 0         | 0         | 89                          |
| 11    | Methylene blue          | 0                      | 0         | 0         | 0         | 77                          |

<sup>a</sup> Yields were determined by <sup>1</sup>H-NMR. <sup>b</sup> Since the starting material is somewhat volatile, it is difficult to recover it perfectly even by careful work-up.

## 2.2. Optimization of the Reaction Conditions (Supplementary data for Table 2)

**Table S3.** Study of Additive (Base) under Air

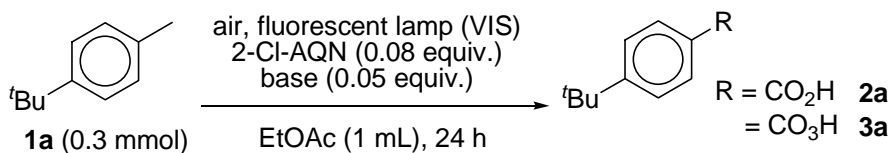

| entry           | base                            | solubility<br>(g /100g of H <sub>2</sub> O at 25 °C) | yield (%) <sup>a</sup> |    |
|-----------------|---------------------------------|------------------------------------------------------|------------------------|----|
|                 |                                 |                                                      | 2a                     | 3a |
| 1               | Li <sub>2</sub> CO <sub>3</sub> | 1.3                                                  | 92                     | 6  |
| 2               | Na <sub>2</sub> CO <sub>3</sub> | 29.4                                                 | 55                     | 24 |
| 3 <sup>b</sup>  | Na <sub>2</sub> CO <sub>3</sub> | 29.4                                                 | 91                     | 0  |
| 4 <sup>c</sup>  | Na <sub>2</sub> CO <sub>3</sub> | 29.4                                                 | 85                     | 8  |
| 5               | NaHCO <sub>3</sub>              | 10.3                                                 | 55                     | 31 |
| 6 <sup>b</sup>  | NaHCO <sub>3</sub>              | 10.3                                                 | 88(86) <sup>d</sup>    | 0  |
| 7 <sup>c</sup>  | NaHCO <sub>3</sub>              | 10.3                                                 | 60                     | 35 |
| 8               | K <sub>2</sub> CO <sub>3</sub>  | 112.0                                                | 100(94) <sup>d</sup>   | 0  |
| 9               | CaCO <sub>3</sub>               | 0.8                                                  | 38                     | 61 |
| 10 <sup>b</sup> | CaCO <sub>3</sub>               | 0.8                                                  | 83                     | 17 |
| 11 <sup>c</sup> | CaCO <sub>3</sub>               | 0.8                                                  | 76                     | 15 |
| 12              | Ca(OH) <sub>2</sub>             | 0.2                                                  | 33                     | 60 |
| 13 <sup>b</sup> | Ca(OH) <sub>2</sub>             | 0.2                                                  | 94(87) <sup>d</sup>    | 36 |
| 14 <sup>c</sup> | Ca(OH) <sub>2</sub>             | 0.2                                                  | 53                     | 36 |
| 15 <sup>e</sup> | KOAc                            | 256.0                                                | 84                     | 16 |
| 16 <sup>b</sup> | K <sub>2</sub> CO <sub>3</sub>  | 112.0                                                | 83                     | 0  |

<sup>a</sup> Yields were determined by <sup>1</sup>H-NMR. <sup>b</sup> H<sub>2</sub>O (75 μL) was used. <sup>c</sup> For 72 h.

<sup>d</sup> Isolated yields. <sup>e</sup> For 15 h.

**Table S4.** Study of Additive (Acid) under Air

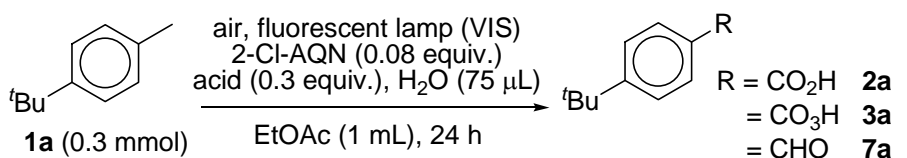

| entry           | acid                               | pKa                  | yield (%) <sup>a</sup> |    |       |
|-----------------|------------------------------------|----------------------|------------------------|----|-------|
|                 |                                    |                      | 2a                     | 3a | 7a    |
| 1               | TfSO <sub>3</sub> H                | H <sub>0</sub> = -15 | 52                     | 14 | trace |
| 2 <sup>b</sup>  | TfSO <sub>3</sub> H                | H <sub>0</sub> = -15 | 78                     | 22 | 0     |
| 3               | H <sub>2</sub> SO <sub>4</sub>     | H <sub>0</sub> = -12 | 75                     | 18 | 0     |
| 4               | p-TsOHH <sub>2</sub> O             | -2.8                 | 76                     | 18 | 0     |
| 5               | HF <sub>4</sub>                    | -0.4                 | 92                     | 0  | 0     |
| 6 <sup>b</sup>  | TFA                                | 0.23                 | 100 (99) <sup>c</sup>  | 0  | 0     |
| 7               | CCl <sub>3</sub> CO <sub>2</sub> H | 0.77                 | 94                     | 0  | 0     |
| 8               | F <sub>2</sub> CHCO <sub>2</sub> H | 1.24                 | 64                     | 32 | 0     |
| 9               | AcOH                               | 4.74                 | 42                     | 53 | 0     |
| 10 <sup>b</sup> | AcOH                               | 4.74                 | 83                     | 10 | 0     |
| 11 <sup>d</sup> | TFA                                | 0.23                 | 81                     | 12 | 0     |

<sup>a</sup> Yields were determined by <sup>1</sup>H-NMR. <sup>b</sup> For 72 h. <sup>c</sup> Isolated yields. <sup>d</sup> H<sub>2</sub>O was not added.

### 2.3. Aerobic Photooxidation under Low Concentration of Oxygen

**Table S5.** Aerobic Photooxidation under Low Concentration of O<sub>2</sub>

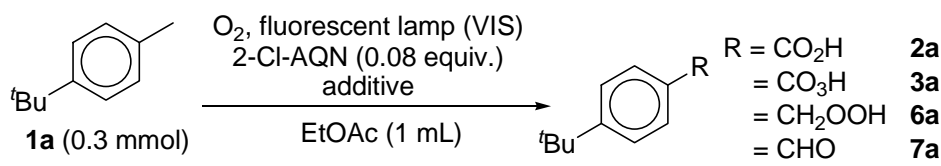

| entry | additive                                     | O <sub>2</sub> (%) | time (h) | yield (%) <sup>a</sup> |    |    |       |
|-------|----------------------------------------------|--------------------|----------|------------------------|----|----|-------|
|       |                                              |                    |          | 2a                     | 3a | 6a | 7a    |
| 1     | TFA (0.3 equiv.) / H <sub>2</sub> O (75 μL)  | 10                 | 24       | 93 (93)                | 0  | 0  | 0     |
| 2     | TFA (0.3 equiv.) / H <sub>2</sub> O (75 μL)  | 5                  | 24       | 87                     | 5  | 0  | trace |
| 3     | TFA (0.3 equiv.) / H <sub>2</sub> O (75 μL)  | 5                  | 30       | 96 (100)               | 0  | 0  | 0     |
| 4     | K <sub>2</sub> CO <sub>3</sub> (0.05 equiv.) | 10                 | 12       | 83 (79)                | 2  | 7  | 10    |
| 5     | K <sub>2</sub> CO <sub>3</sub> (0.05 equiv.) | 10                 | 15       | 100 (88)               | 0  | 0  | 0     |
| 6     | K <sub>2</sub> CO <sub>3</sub> (0.05 equiv.) | 10                 | 18       | (95)                   | 0  | 0  | 0     |
| 7     | K <sub>2</sub> CO <sub>3</sub> (0.05 equiv.) | 5                  | 18       | 67                     | 0  | 13 | 15    |
| 8     | K <sub>2</sub> CO <sub>3</sub> (0.05 equiv.) | 5                  | 24       | 99 (95)                | 0  | 0  | 0     |

<sup>a</sup> Yields were determined by <sup>1</sup>H-NMR. Numbers in parentheses were isolated yields.

### 2.4. Time Course of the Aerobic Photooxidation

**Figure 1. Without Additive**

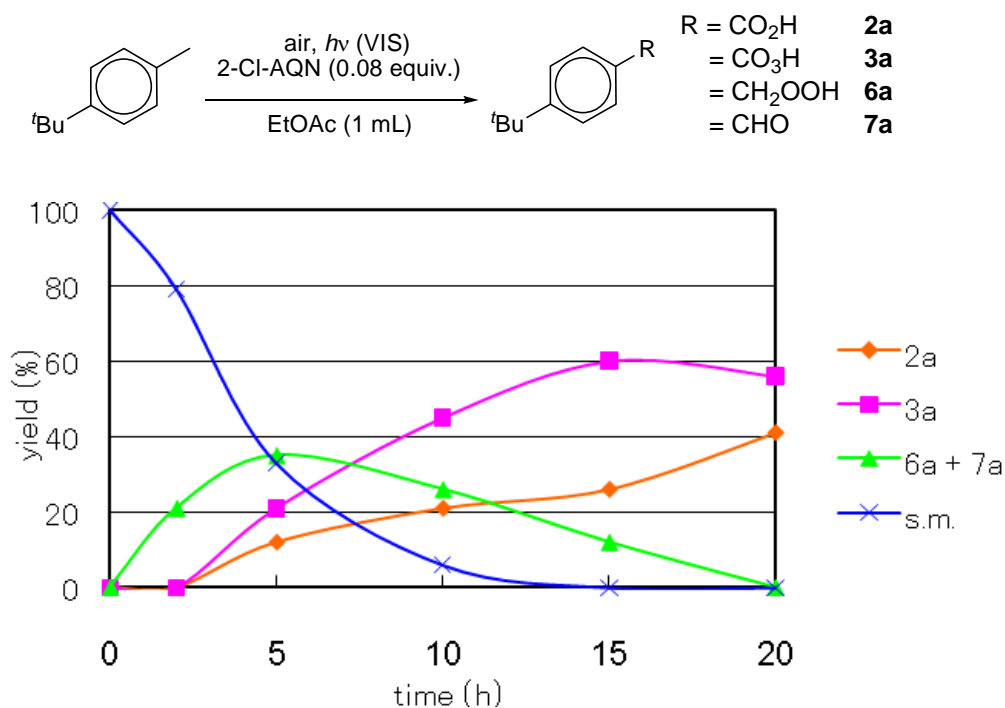

Figure 2. With TFA / H<sub>2</sub>O

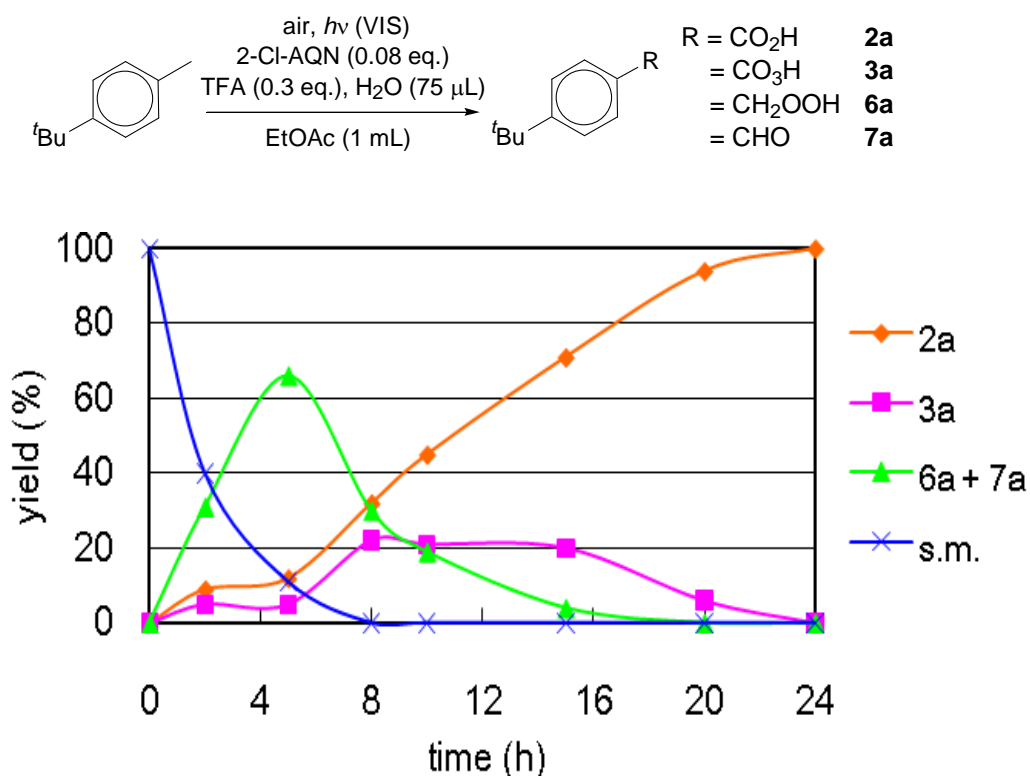

Figure 3. With K<sub>2</sub>CO<sub>3</sub>

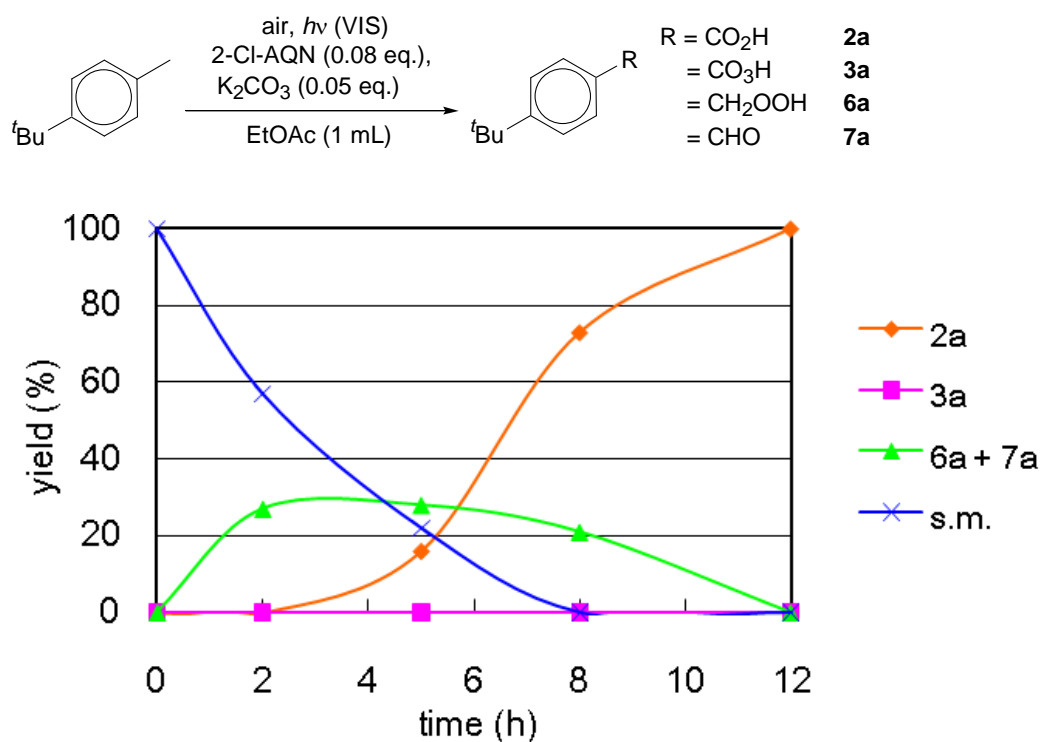

## 2.5. Measurement of Peroxide by Iodometry

Typical procedure is as follows; 4-*tert*-butyltoluene (0.3 mmol) is oxidized with 2-Cl-AQN (0.08 equiv.), TFA (0.3 equiv.) and H<sub>2</sub>O (75 μL) in EtOAc (1 mL) under irradiation of VIS from fluorescent lamp (22w x 4) in an air atmosphere for 24 h, which usually gives 4-*tert*-butylbenzoic acid quantitatively. The residue is mixed with saturated aq. KI (3 mL), AcOH (1 mL) and *i*-PrOH (10 mL), and warmed at 100°C for 5 min. The result solution is titrated by 0.1 M aq. Na<sub>2</sub>S<sub>2</sub>O<sub>3</sub>, and the volumes of required 0.1 M aq. Na<sub>2</sub>S<sub>2</sub>O<sub>3</sub> are 5.9 and 5.5 mL for two trials. These results correspond to 0.18 and 0.16 mmol of peroxides respectively after subtracting the required volume of 0.1 M aq. Na<sub>2</sub>S<sub>2</sub>O<sub>3</sub> for blank experiment.

## 2.6. General Procedure

**Aerobic photooxidation:** A solution of substrate (0.3 mmol), 2-Cl-AQN (0.08 equiv) and additive in dry EtOAc (1 mL) in a Pyrex test tube under an air atmosphere is stirred and irradiated externally with four 22W fluorescent lamps for indicated time. The product is extracted with 10% aq. NaHCO<sub>3</sub>. Then the aq. solution is acidified with 2N aq. HCl and extracted with Et<sub>2</sub>O. The product is purified by PTLC.

**4-*tert*-Butylbenzoic acid (2a):** colorless solid; <sup>1</sup>H NMR (500 MHz, CDCl<sub>3</sub>) δ 8.06 (d, *J* = 8.7 Hz, 2H), 7.49 (d, *J* = 8.7 Hz, 2H), 1.35 (s, 9H); <sup>13</sup>C NMR (125 MHz, CDCl<sub>3</sub>) δ 172.6, 157.7, 130.2, 126.7, 125.6, 35.3, 31.2; MS *m/z* 178 (M<sup>+</sup>), 163, 135, 91; CAS Registry Number: 98-73-7

***p*-Toluic acid (2b):** colorless solid; <sup>1</sup>H NMR (500 MHz, CDCl<sub>3</sub>) δ 8.00 (d, *J* = 8.6 Hz, 2H), 7.27 (d, *J* = 8.6 Hz, 2H), 2.43 (s, 3H); <sup>13</sup>C NMR (125 MHz, CDCl<sub>3</sub>) δ 172.5, 144.7, 130.4, 129.3, 126.7, 21.9; MS *m/z* 136 (M<sup>+</sup>), 119, 91; CAS Registry Number: 99-94-5

***m*-Toluic acid (2c):** colorless solid; <sup>1</sup>H NMR (400 MHz, CDCl<sub>3</sub>) δ 7.94 (s, 1H), 7.93 (d, *J* = 8.2 Hz, 1H), 7.41 (d, *J* = 7.3 Hz, 1H), 7.38-7.34 (m, 1H), 2.42 (s, 3H); <sup>13</sup>C NMR (100 MHz, CDCl<sub>3</sub>) δ 172.6, 138.3, 134.6, 130.7, 129.2, 128.4, 127.4, 21.2; MS *m/z* 136 (M<sup>+</sup>), 119, 91; CAS Registry Number: 99-04-7

***o*-Toluic acid (2d):** colorless solid; <sup>1</sup>H NMR (400 MHz, CDCl<sub>3</sub>) δ 8.09-8.07 (m, 1H), 7.47-7.43 (m, 1H), 7.30-7.25 (m, 2H), 2.67 (s, 3H); <sup>13</sup>C NMR (100 MHz, CDCl<sub>3</sub>) δ 173.4, 141.4, 132.9, 131.9, 131.6, 128.3, 125.8, 22.1; MS *m/z* 136 (M<sup>+</sup>), 118, 91; CAS Registry Number: 118-90-1

***p*-Methoxybenzoic acid (2e):** colorless solid; <sup>1</sup>H NMR (400 MHz, acetone-*d*<sub>6</sub>) δ 7.96 (d, *J* = 9.2 Hz, 2H), 7.0 (d, *J* = 9.2 Hz, 2H), 3.85 (s, 3H); <sup>13</sup>C NMR (100 MHz, acetone-*d*<sub>6</sub>) δ 167.5, 164.4, 132.5, 123.7, 114.5, 55.8; MS *m/z* 152 (M<sup>+</sup>), 135, 107; CAS Registry Number: 100-09-4

***p*-Bromobenzoic acid (2f):** colorless solid; <sup>1</sup>H NMR (500 MHz, acetone-*d*<sub>6</sub>) δ 7.93 (d, *J* = 8.6 Hz, 2H), 7.67 (d, *J* = 8.6 Hz, 2H); <sup>13</sup>C NMR (100 MHz, acetone-*d*<sub>6</sub>) δ 166.9, 132.6, 132.3, 130.7, 128.1; MS *m/z* 200 (M<sup>+</sup>), 183, 155; CAS Registry Number: 586-76-5

***p*-Chlorobenzoic acid (2g):** colorless solid; <sup>1</sup>H NMR (500 MHz, acetone-*d*<sub>6</sub>) δ 8.01 (d, *J* = 8.6 Hz, 2H), 7.53 (d, *J* = 8.6 Hz, 2H); <sup>13</sup>C NMR (100 MHz, acetone-*d*<sub>6</sub>) δ 166.7, 139.5, 132.1, 130.3, 129.5; MS *m/z* 156 (M<sup>+</sup>), 139, 111; CAS Registry Number: 74-11-3

**Benzoic acid (2h):** colorless solid; <sup>1</sup>H NMR (500 MHz, CDCl<sub>3</sub>) δ 8.13 (d, *J* = 7.4 Hz, 2H), 7.62 (t, *J* = 7.4 Hz, 1H), 7.48 (t, *J* = 7.4 Hz, 2H); <sup>13</sup>C NMR (125 MHz, acetone-*d*<sub>6</sub>) δ 172.6, 133.9, 130.3, 129.4, 128.6; MS *m/z* 122 (M<sup>+</sup>), 105, 77; CAS Registry Number: 65-85-0

***p*-Phenylbenzoic acid (2i):** colorless solid; <sup>1</sup>H NMR (500 MHz, acetone-*d*<sub>6</sub>) δ 8.10 (d, *J* = 8.6 Hz, 2H), 7.78 (d, *J* = 8.6 Hz, 2H), 7.71 (d, *J* = 7.5 Hz, 2H), 7.48 (t, *J* = 7.5 Hz, 2H), 7.40 (t, *J* = 7.5 Hz, 1H); <sup>13</sup>C



NMR (100 MHz, acetone- $d_6$ )  $\delta$  167.5, 146.1, 140.7, 131.0, 130.4, 129.9, 129.0, 128.0, 127.7; MS  $m/z$  198 ( $M^+$ ), 181, 152; CAS Registry Number: 92-92-2

***p*-Benzoylbenzoic acid (2j)**: colorless solid;  $^1\text{H}$  NMR (500 MHz, acetone- $d_6$ )  $\delta$  8.19 (d,  $J = 8.6$  Hz, 2H), 7.86 (d,  $J = 8.6$  Hz, 2H), 7.79 (d,  $J = 7.4$  Hz, 2H), 7.68 (t,  $J = 7.4$  Hz, 1H), 7.56 (t,  $J = 7.4$  Hz, 2H);  $^{13}\text{C}$  NMR (125 MHz, acetone- $d_6$ )  $\delta$  195.3, 166.3, 141.4, 137.2, 133.8, 132.9, 129.9, 129.7, 128.6; MS  $m/z$  226 ( $M^+$ ), 181, 149, 105; CAS Registry Number: 611-95-0

**4,4'-Oxybis-benzoic acid (2k)**: white powder;  $^1\text{H}$  NMR (500 MHz, DMSO- $d_6$ )  $\delta$  7.96 (d,  $J = 9.2$  Hz, 2H), 7.11 (d,  $J = 9.2$  Hz, 2H);  $^{13}\text{C}$  NMR (125 MHz, DMSO- $d_6$ )  $\delta$  167.2, 160.0, 132.3, 126.9, 119.2; MS  $m/z$  258 ( $M^+$ ), 241; CAS Registry Number: 2215-89-6.

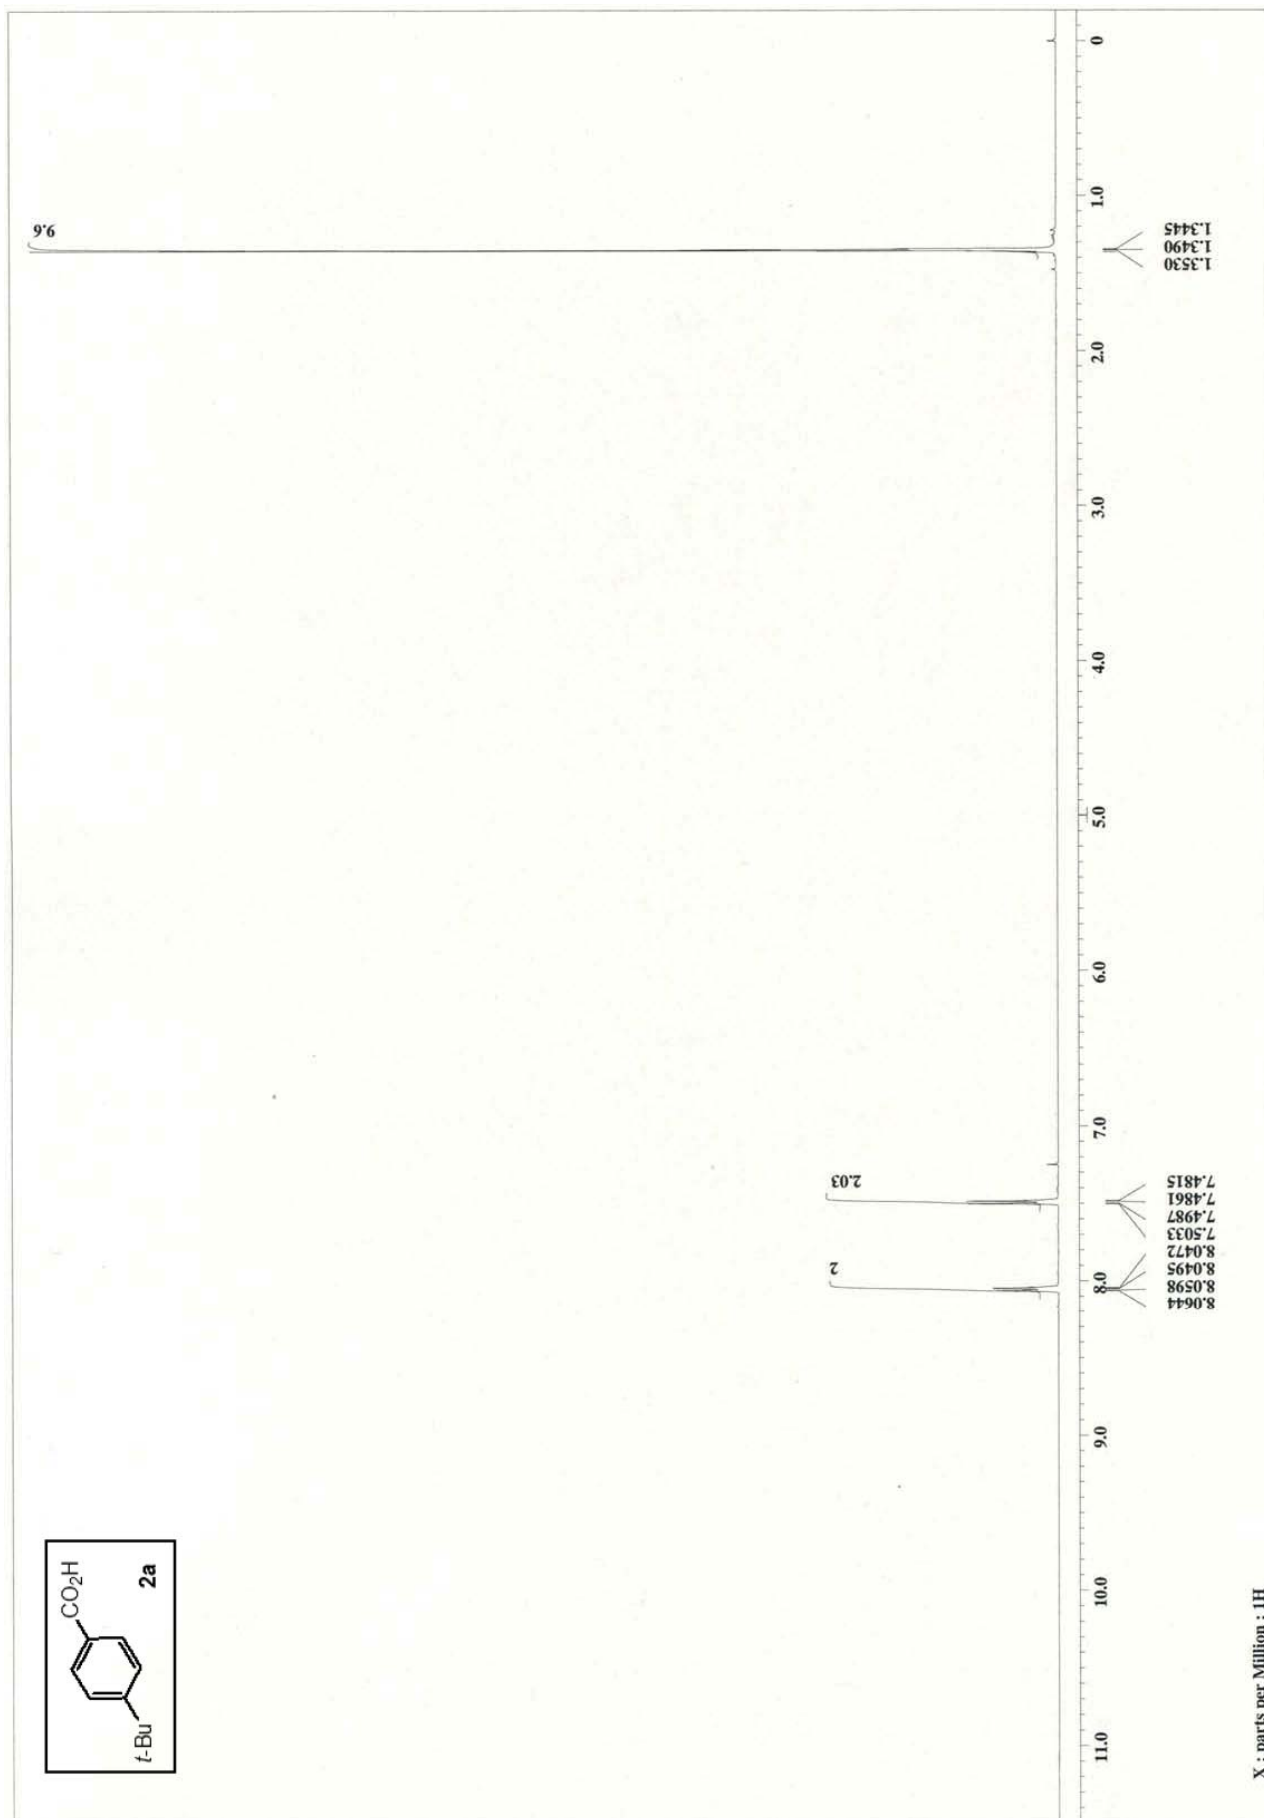

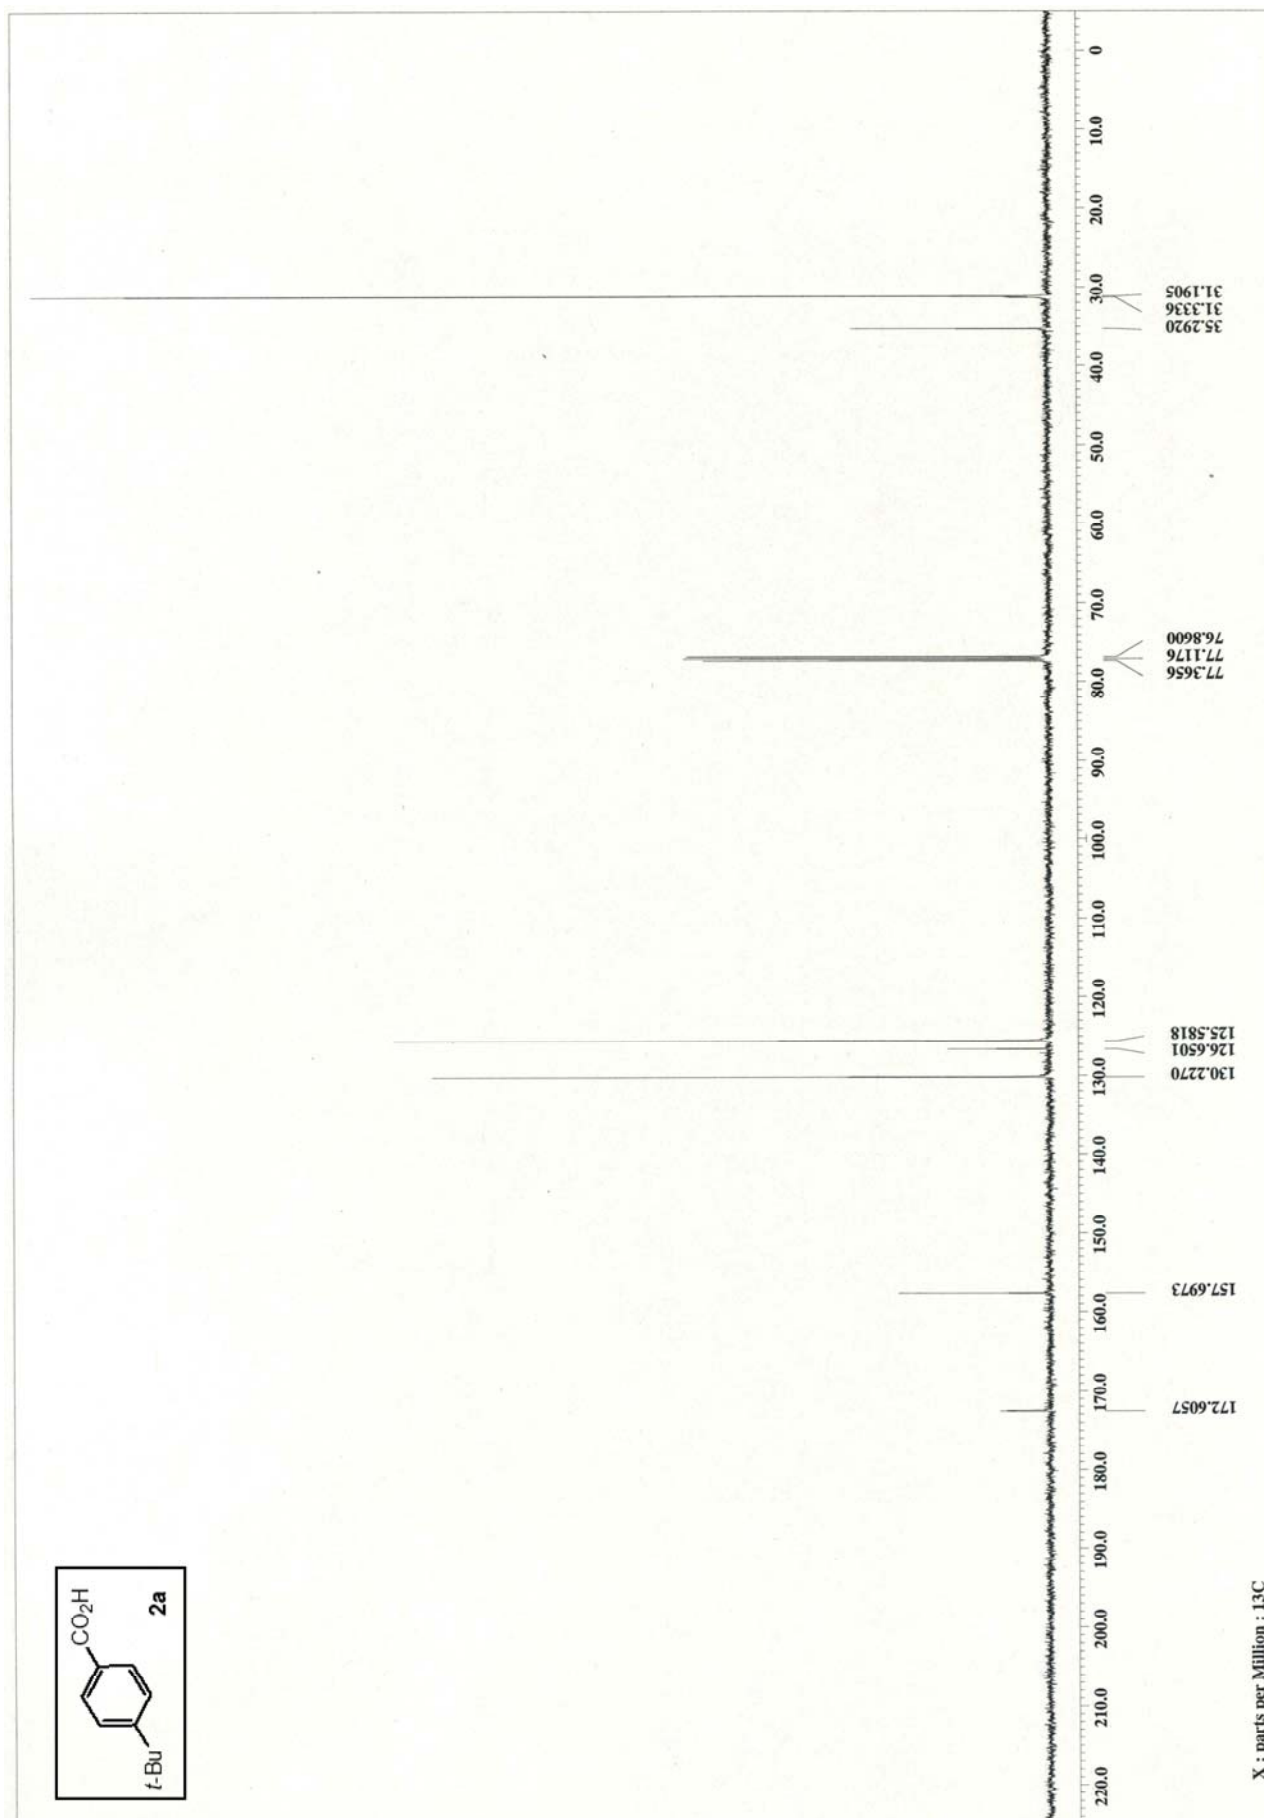

17/11/09

Date Run: 8-26-2009 (Time Run: 14:28:00)  
Ionization mode: EI+

File: LR-09D465  
Instrument: SX102A  
Inlet: Direct

Scan: 4 R.T.: 1  
Base: m/z 163; 82.3%FS TIC: 37154273  
KH-398 HA

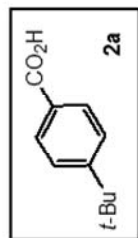

#Ions: 95

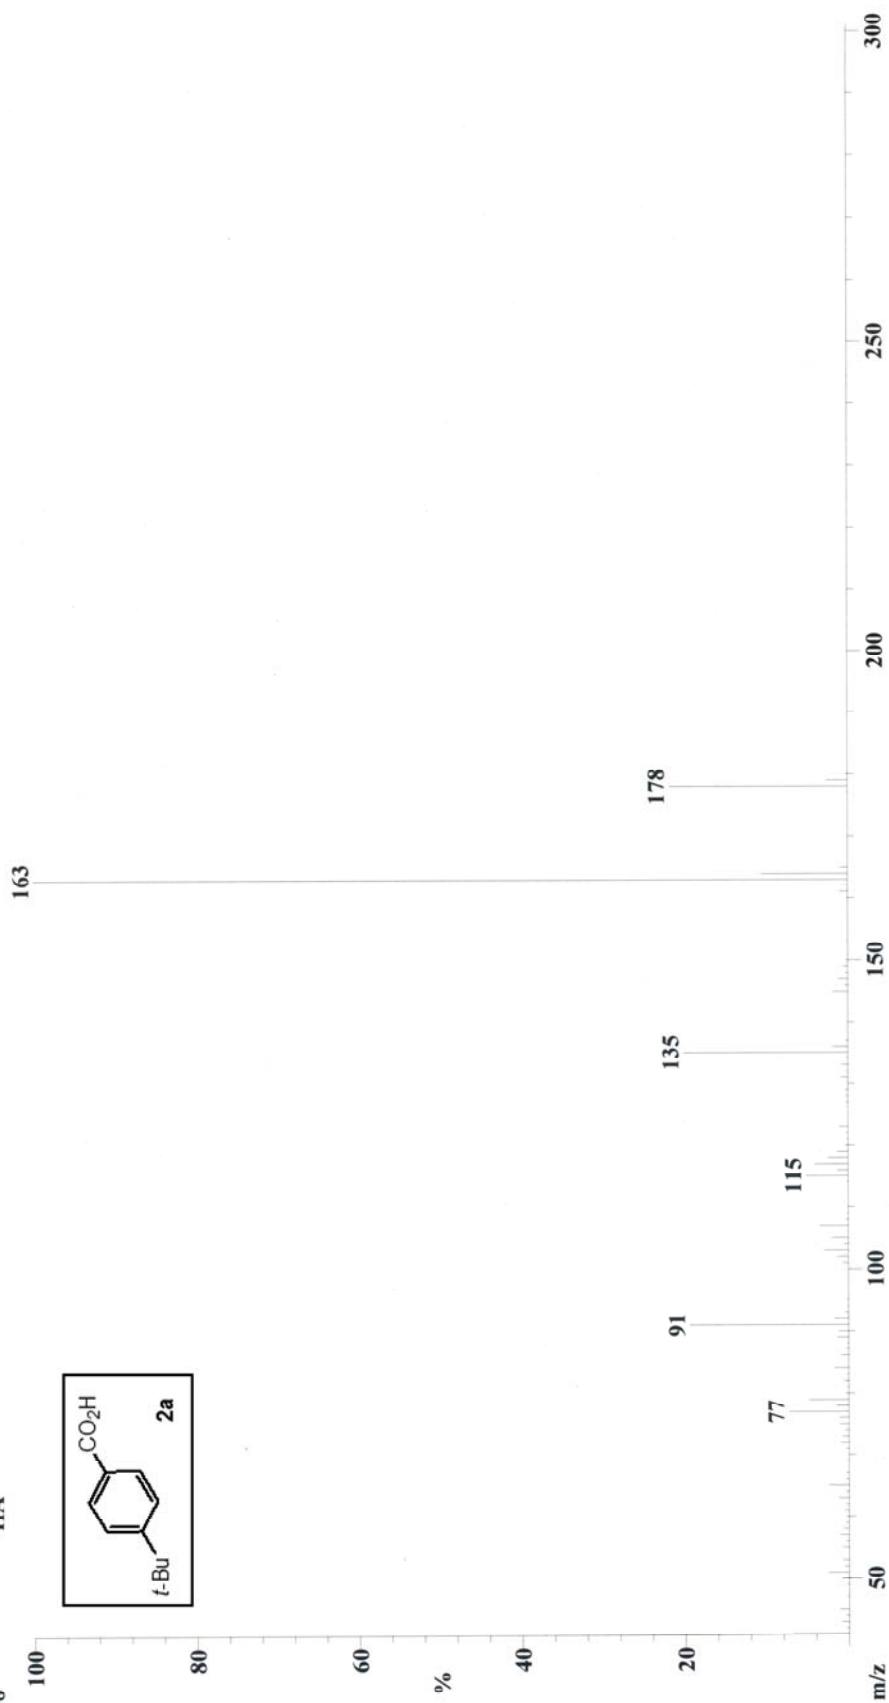

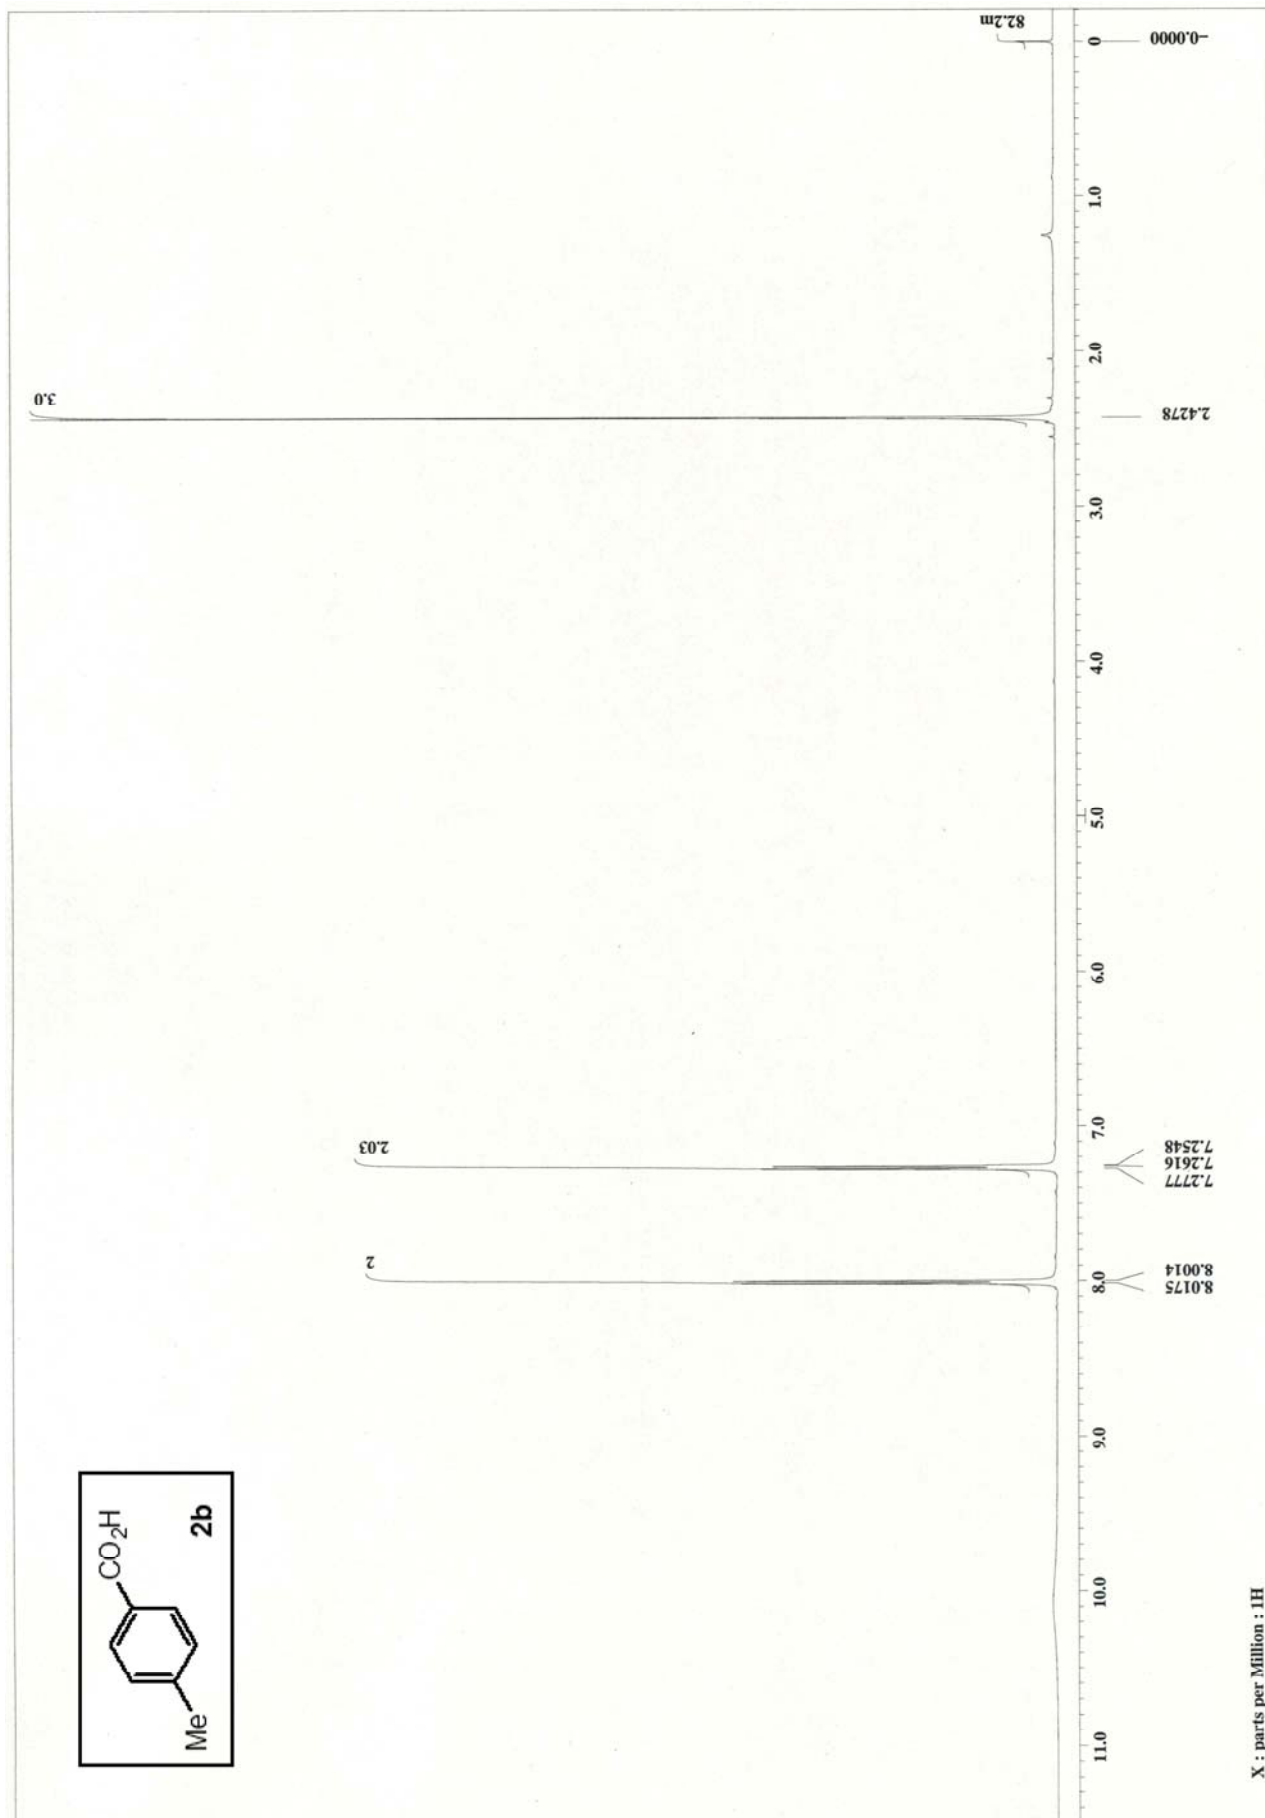

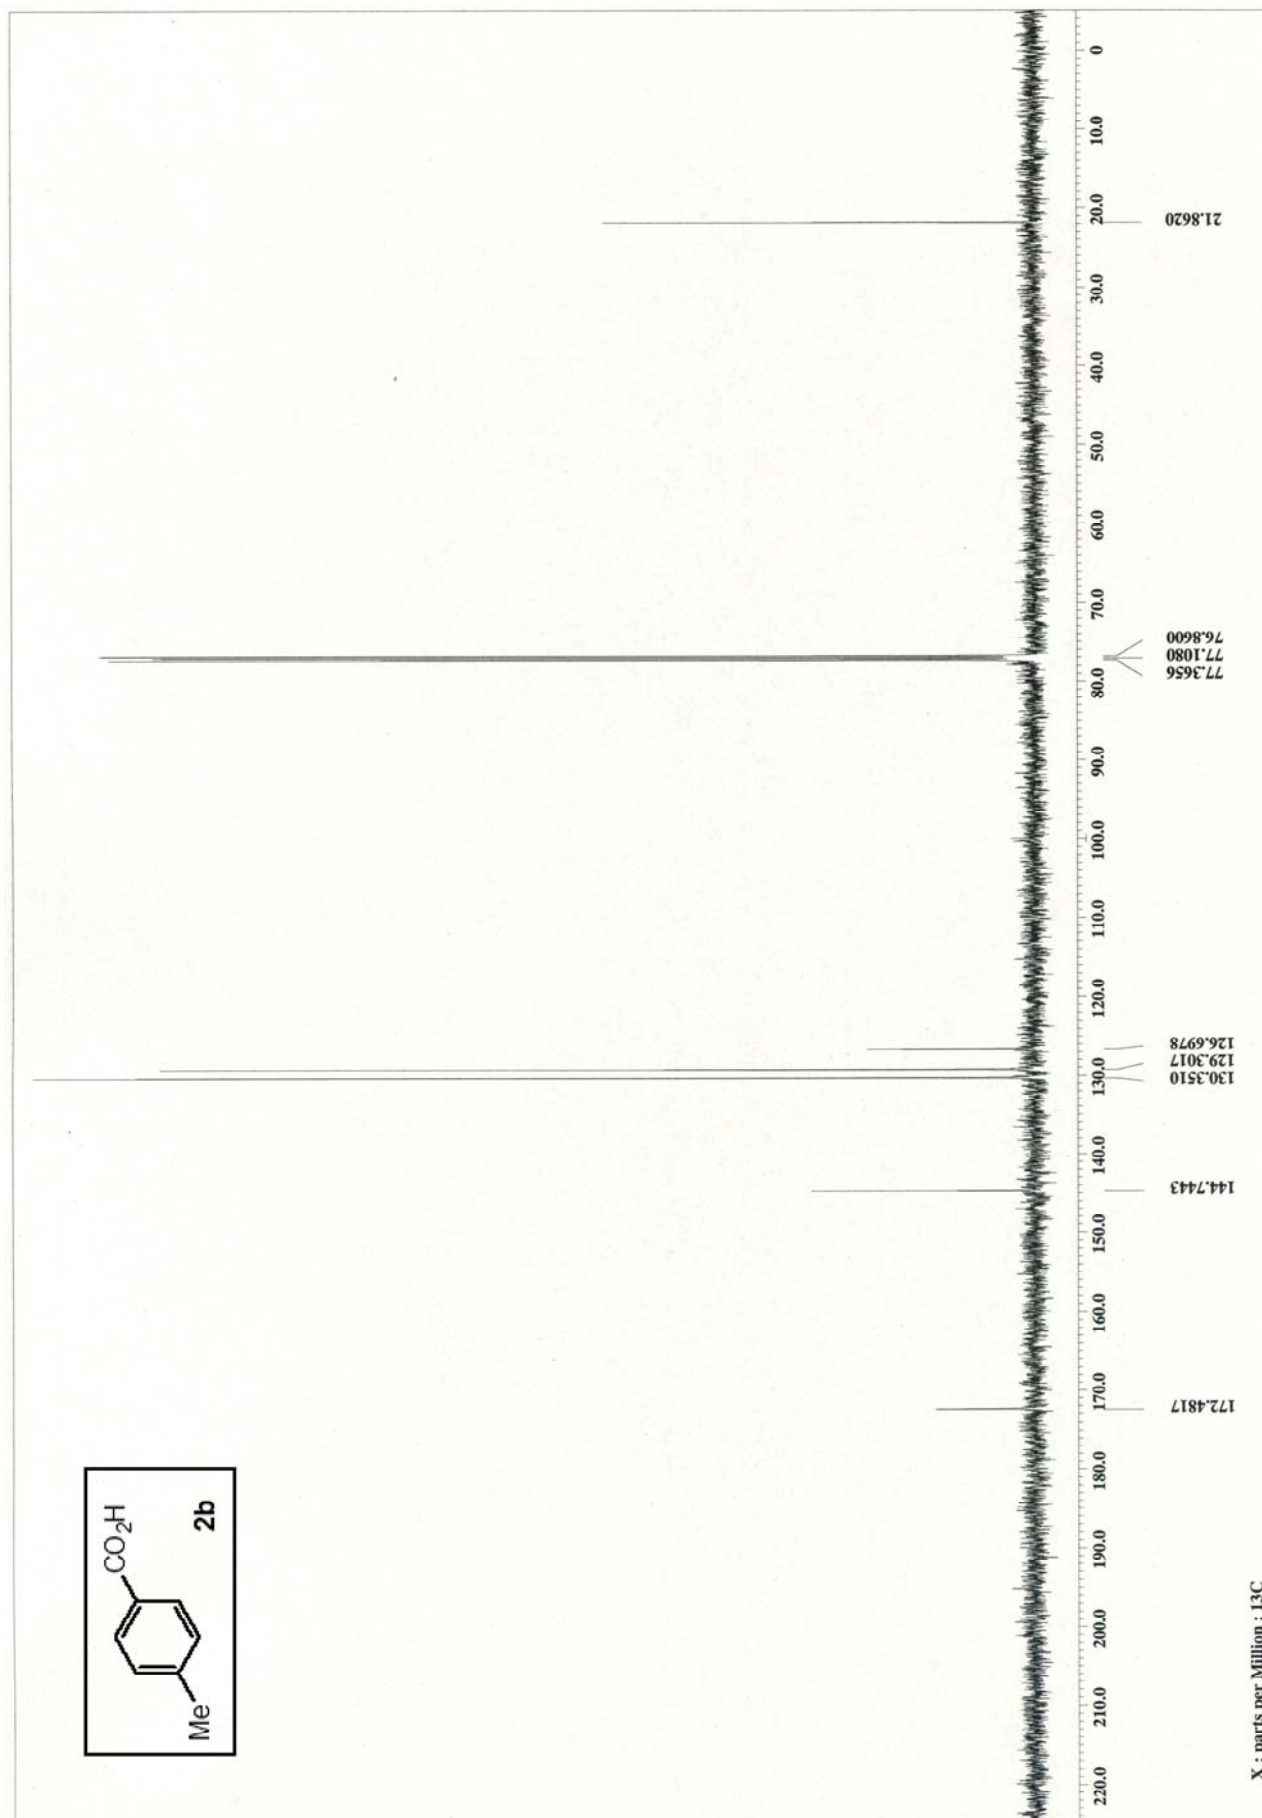

MASS

Date Run: 9-24-2009 (Time Run: 14:25:08)  
Ionization mode: E1+

File: LR-09D744  
Instrument: SX102A  
Inlet: Direct

Scan: 8 R.T.: .23  
Base: m/z 91; 87.6%FS TIC: 57616500  
KH-458 HO

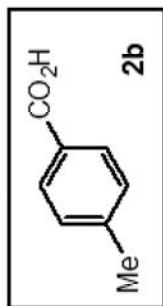

#Ions: 76

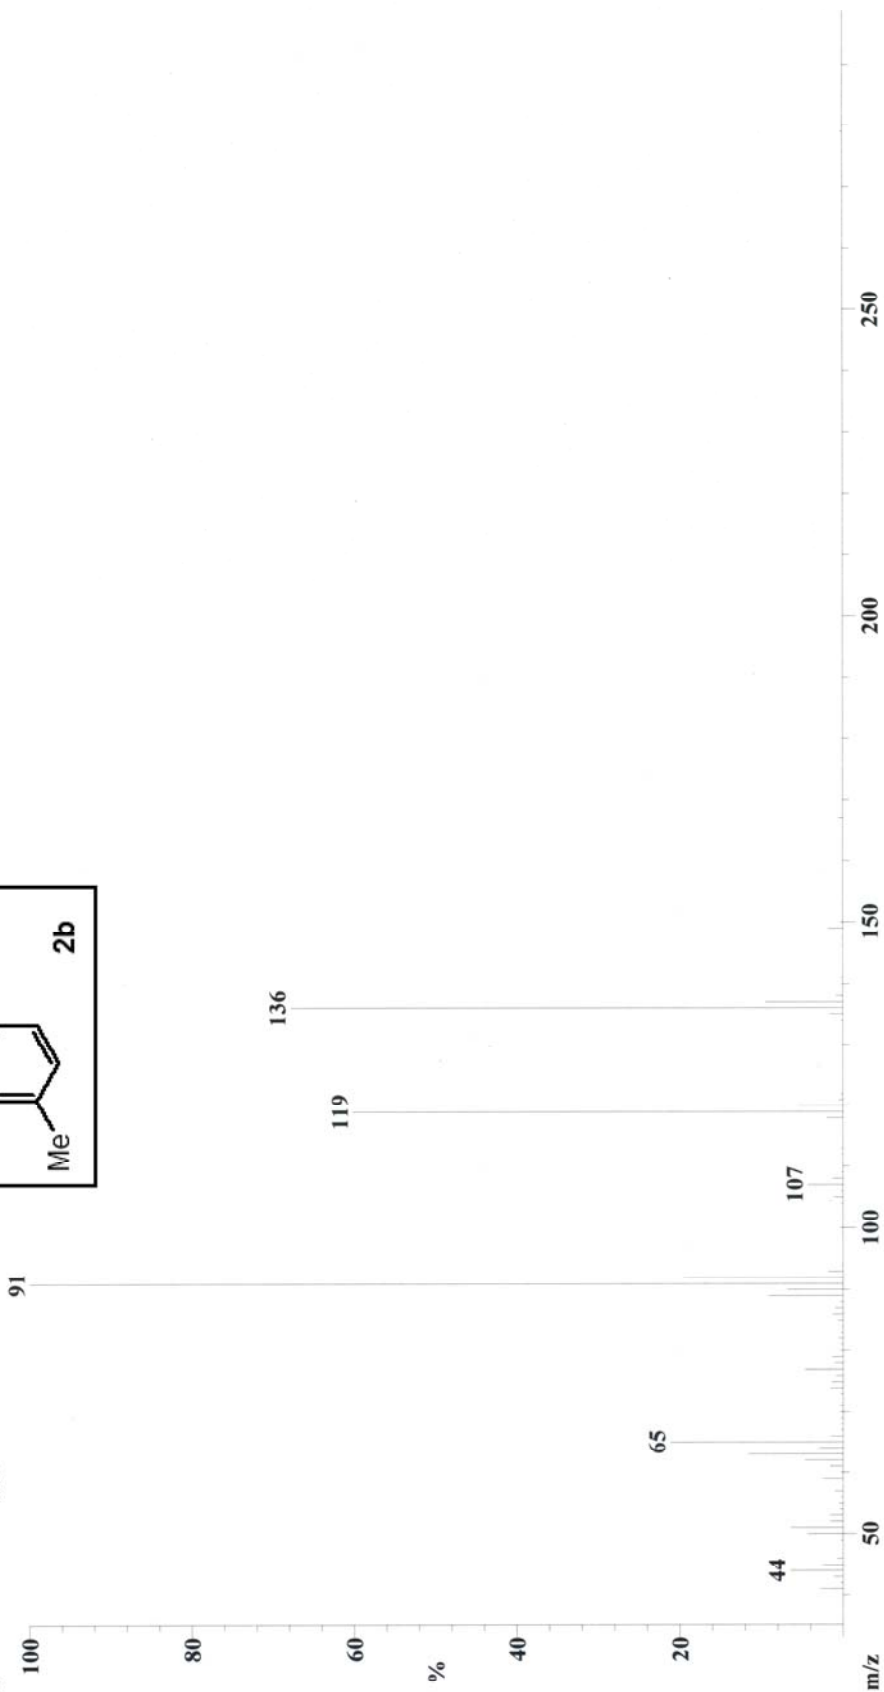

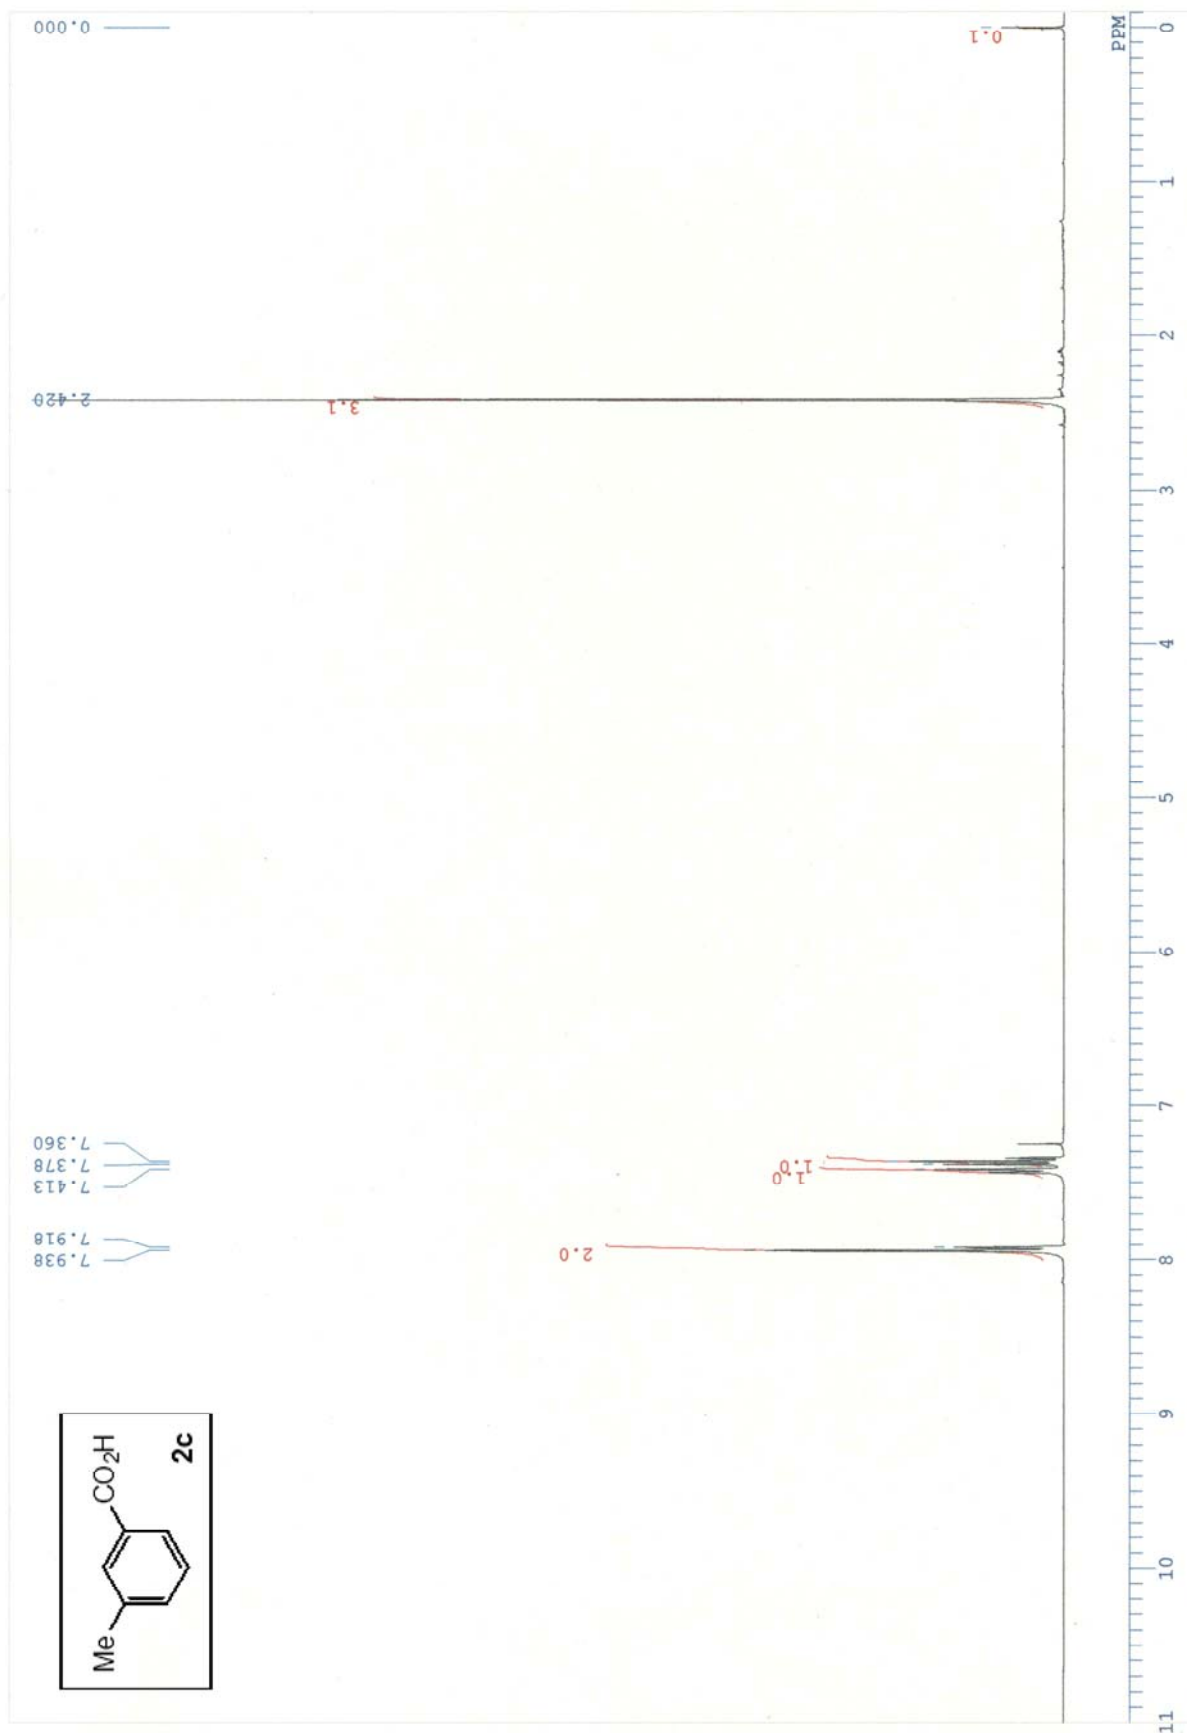



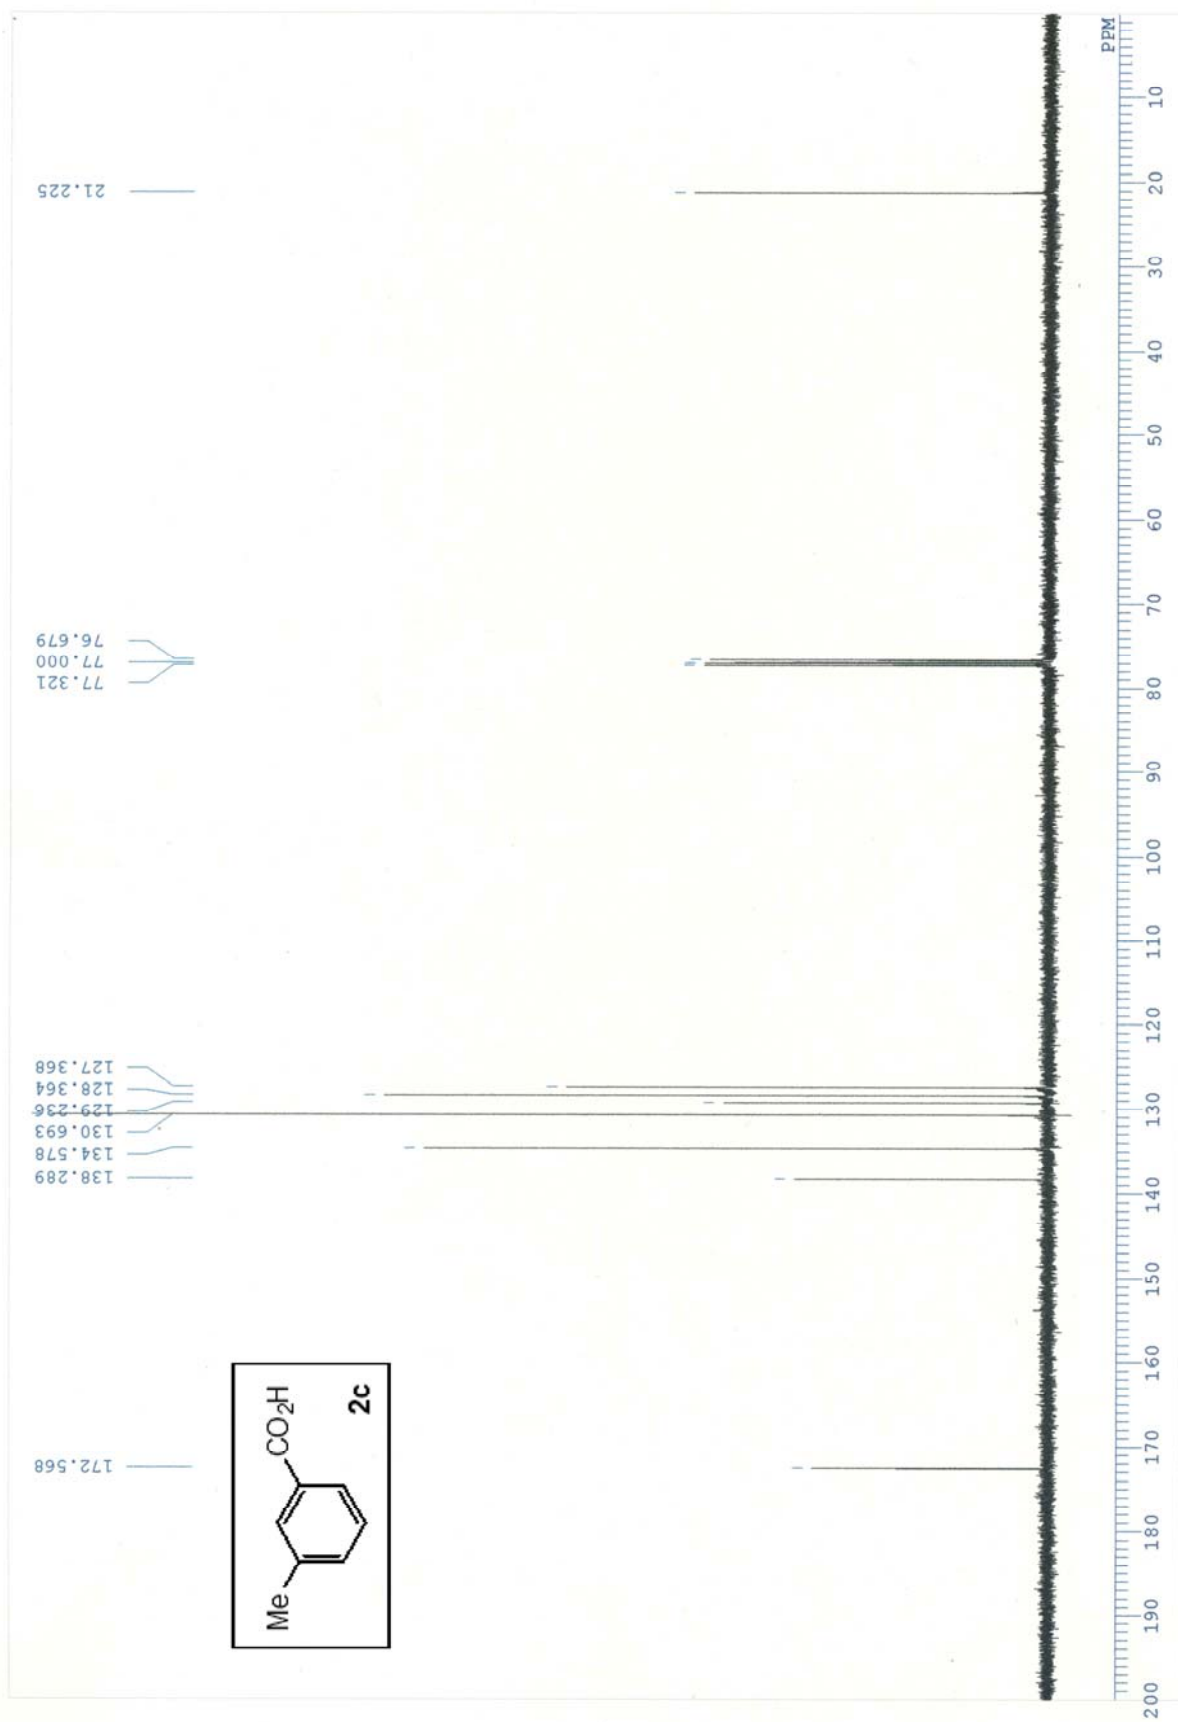

MASS

File: LR-09E024  
Instrument: SX102A  
Inlet: Direct

Date Run: 10-15-2009 (Time Run: 17:05:12)  
Ionization mode: EI+

Scan: 11 R.T.: .33  
Base: m/z 91; 68.9%FS TIC: 45455356  
KH-487 Rf:0.53 HA

#Ions: 84

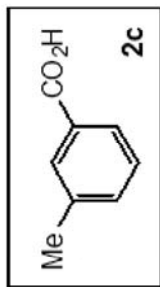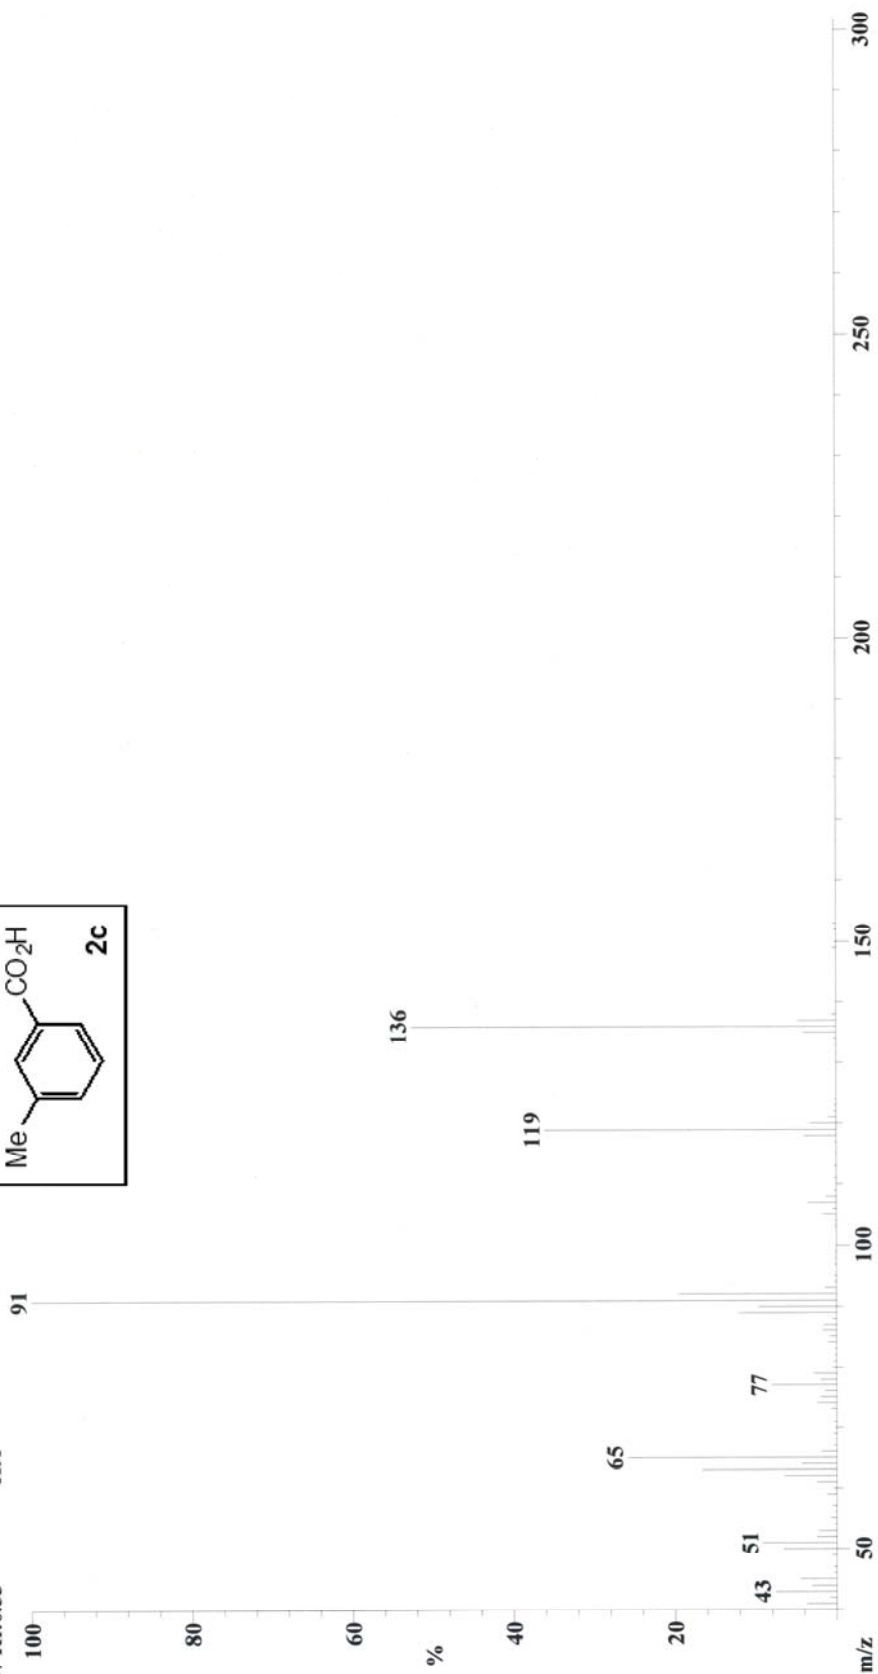

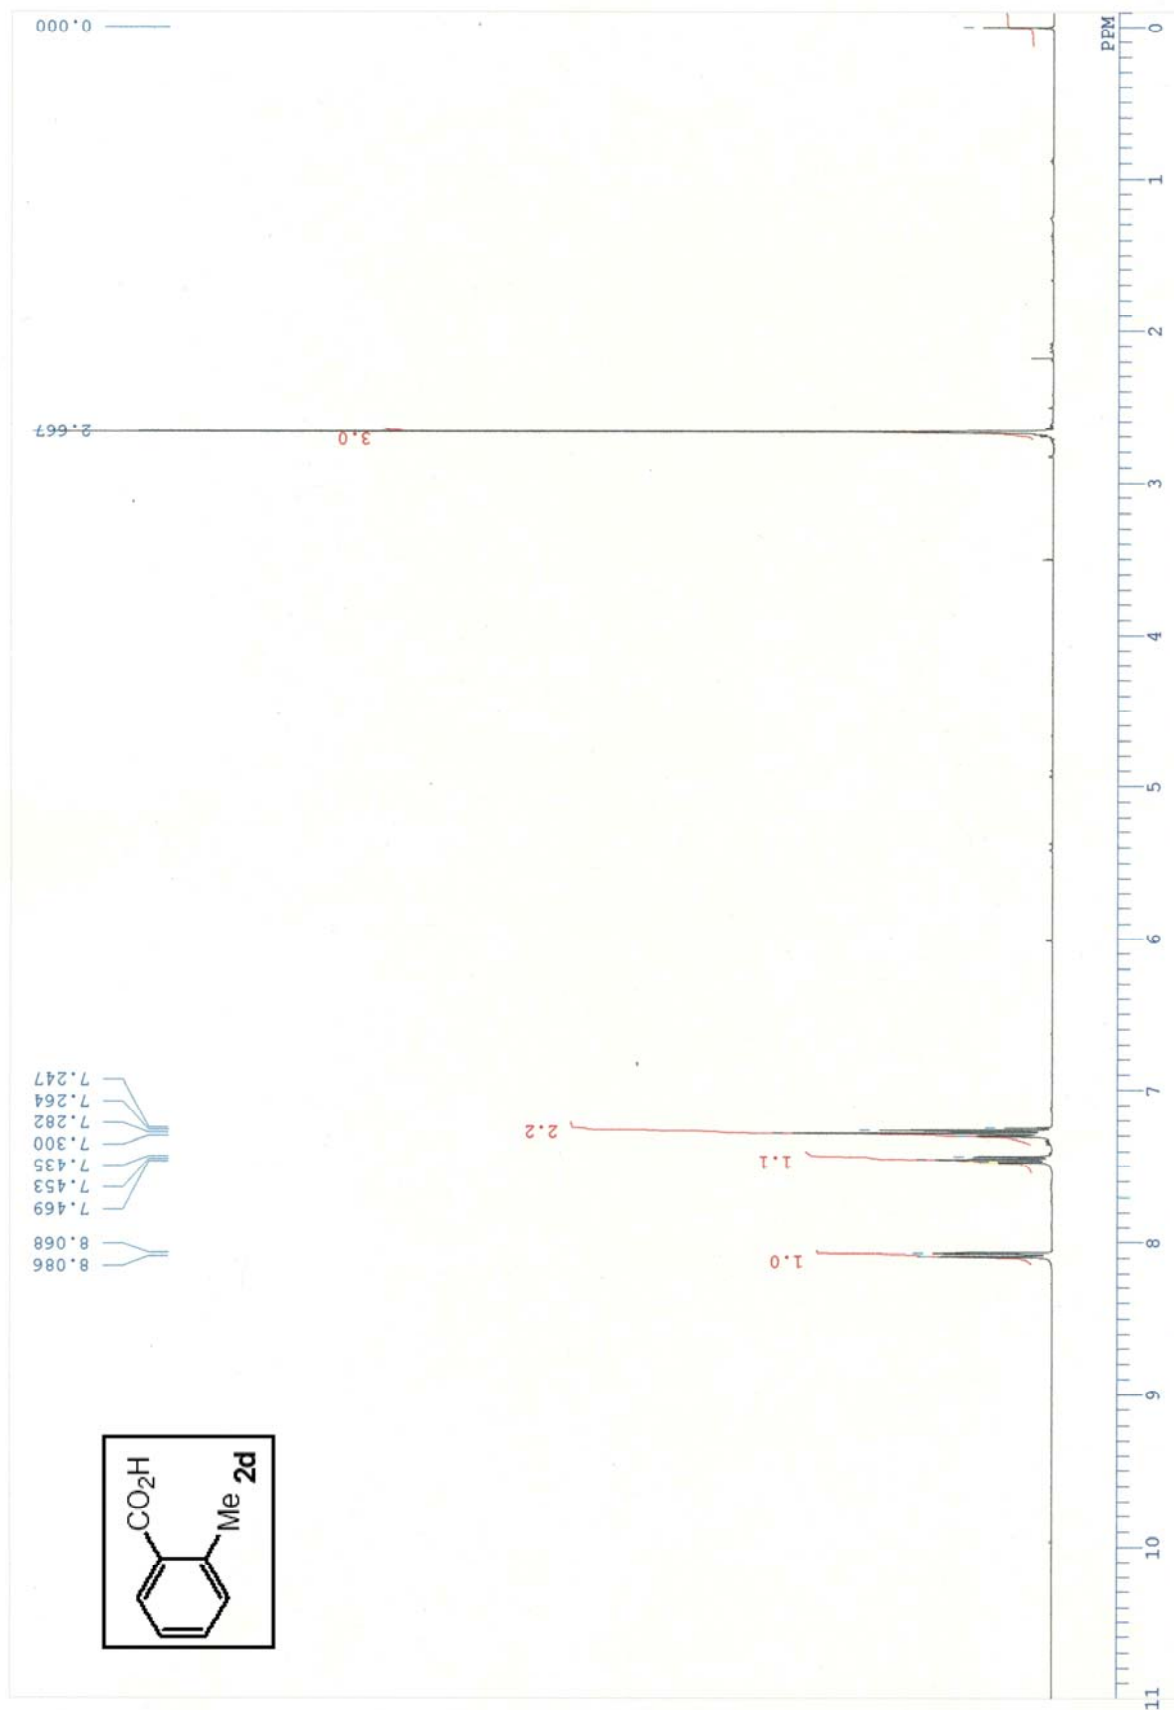

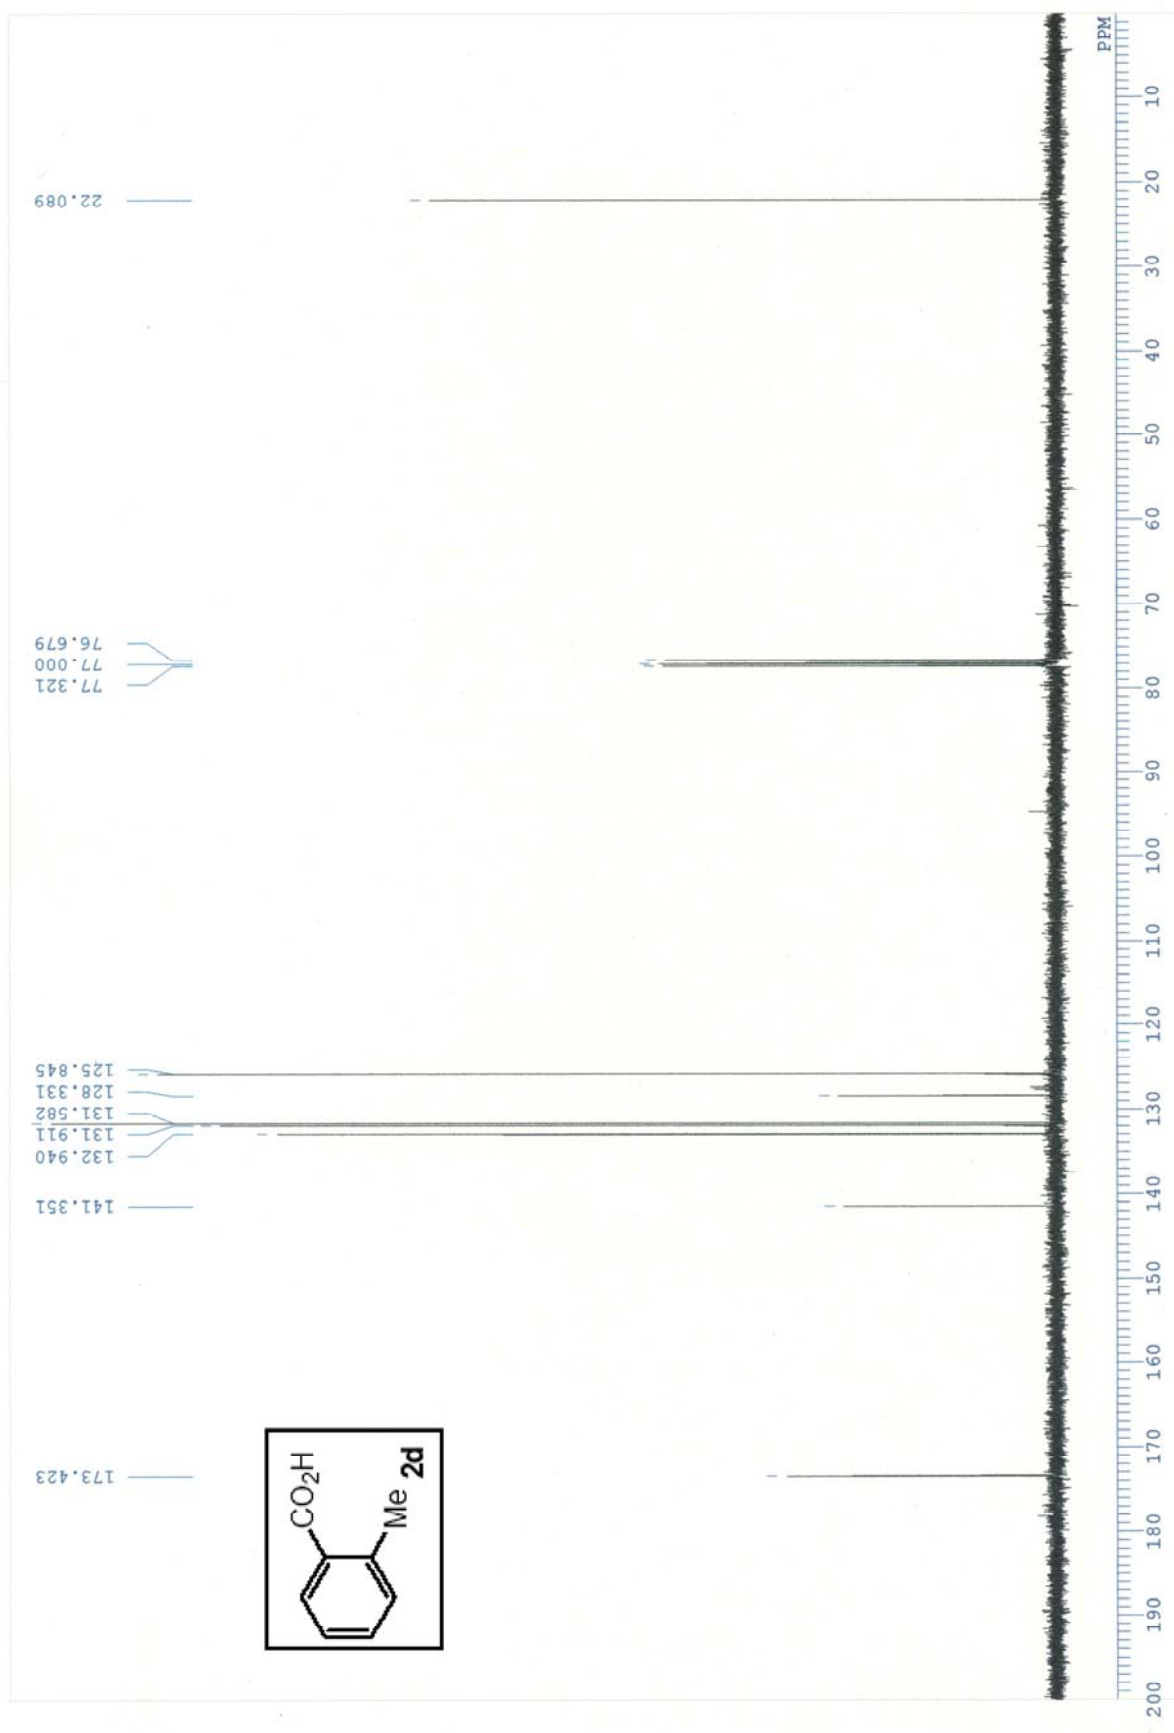

MASS

File: LR-09E022  
Instrument: SX102A  
Inlet: Direct

Date Run: 10-15-2009 (Time Run: 16:54:16)  
Ionization mode: EI+

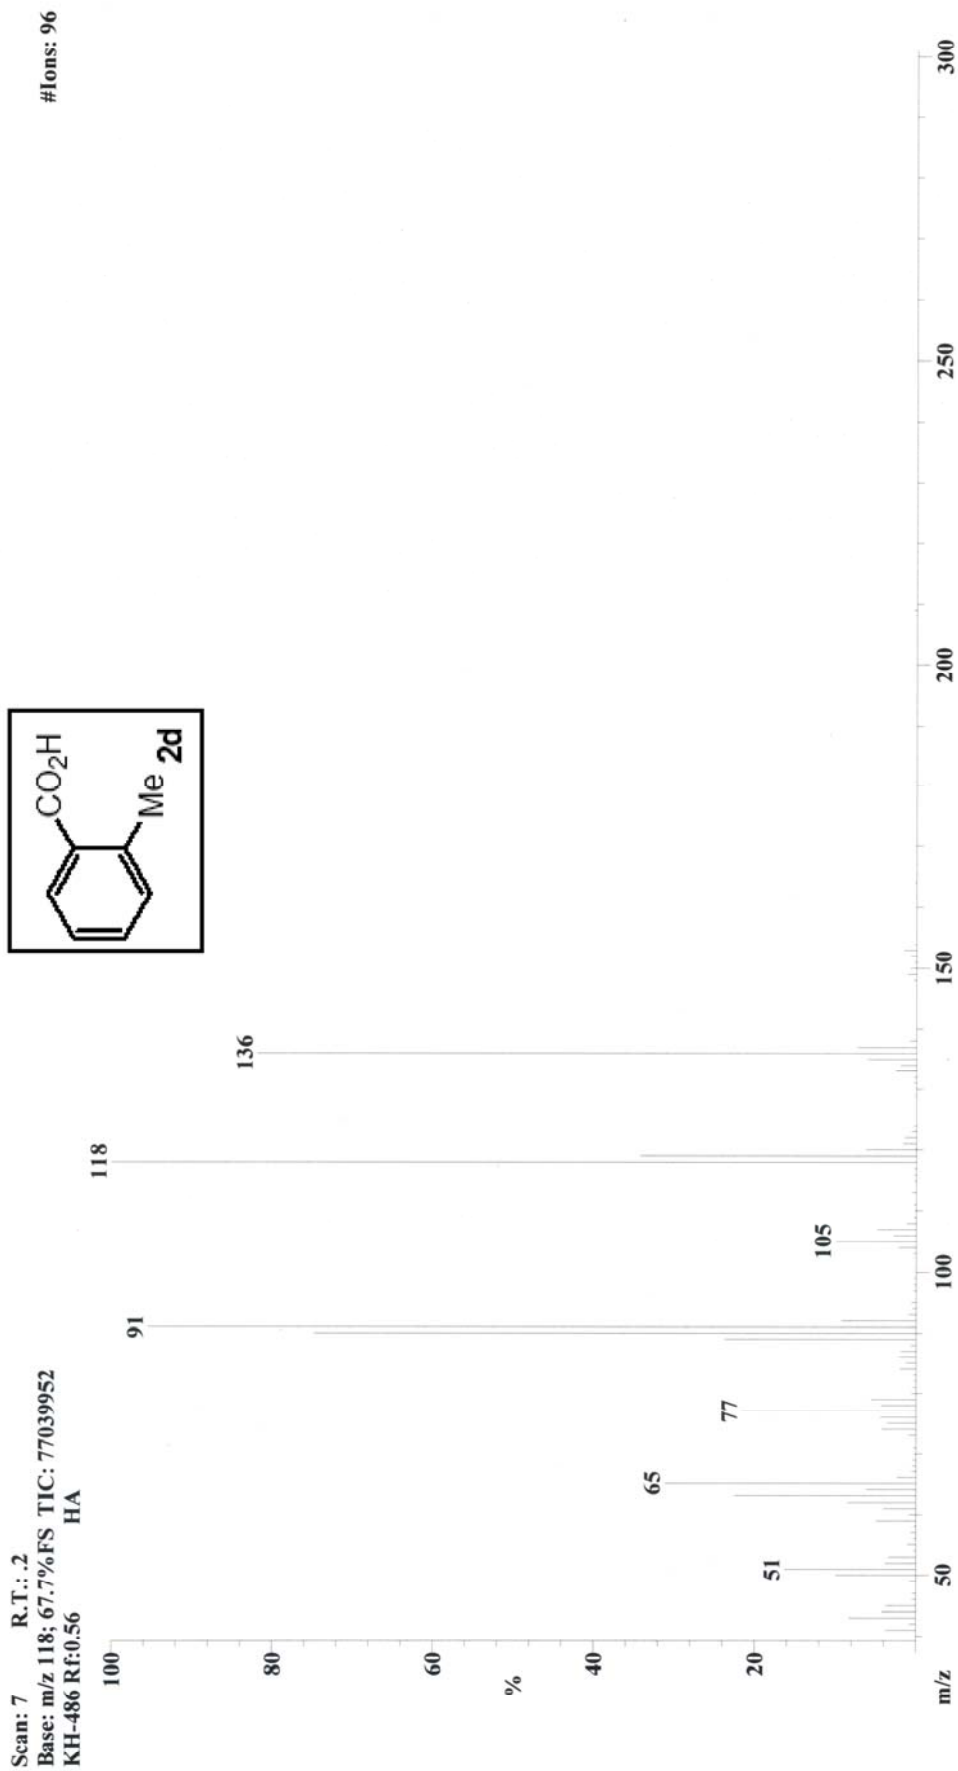

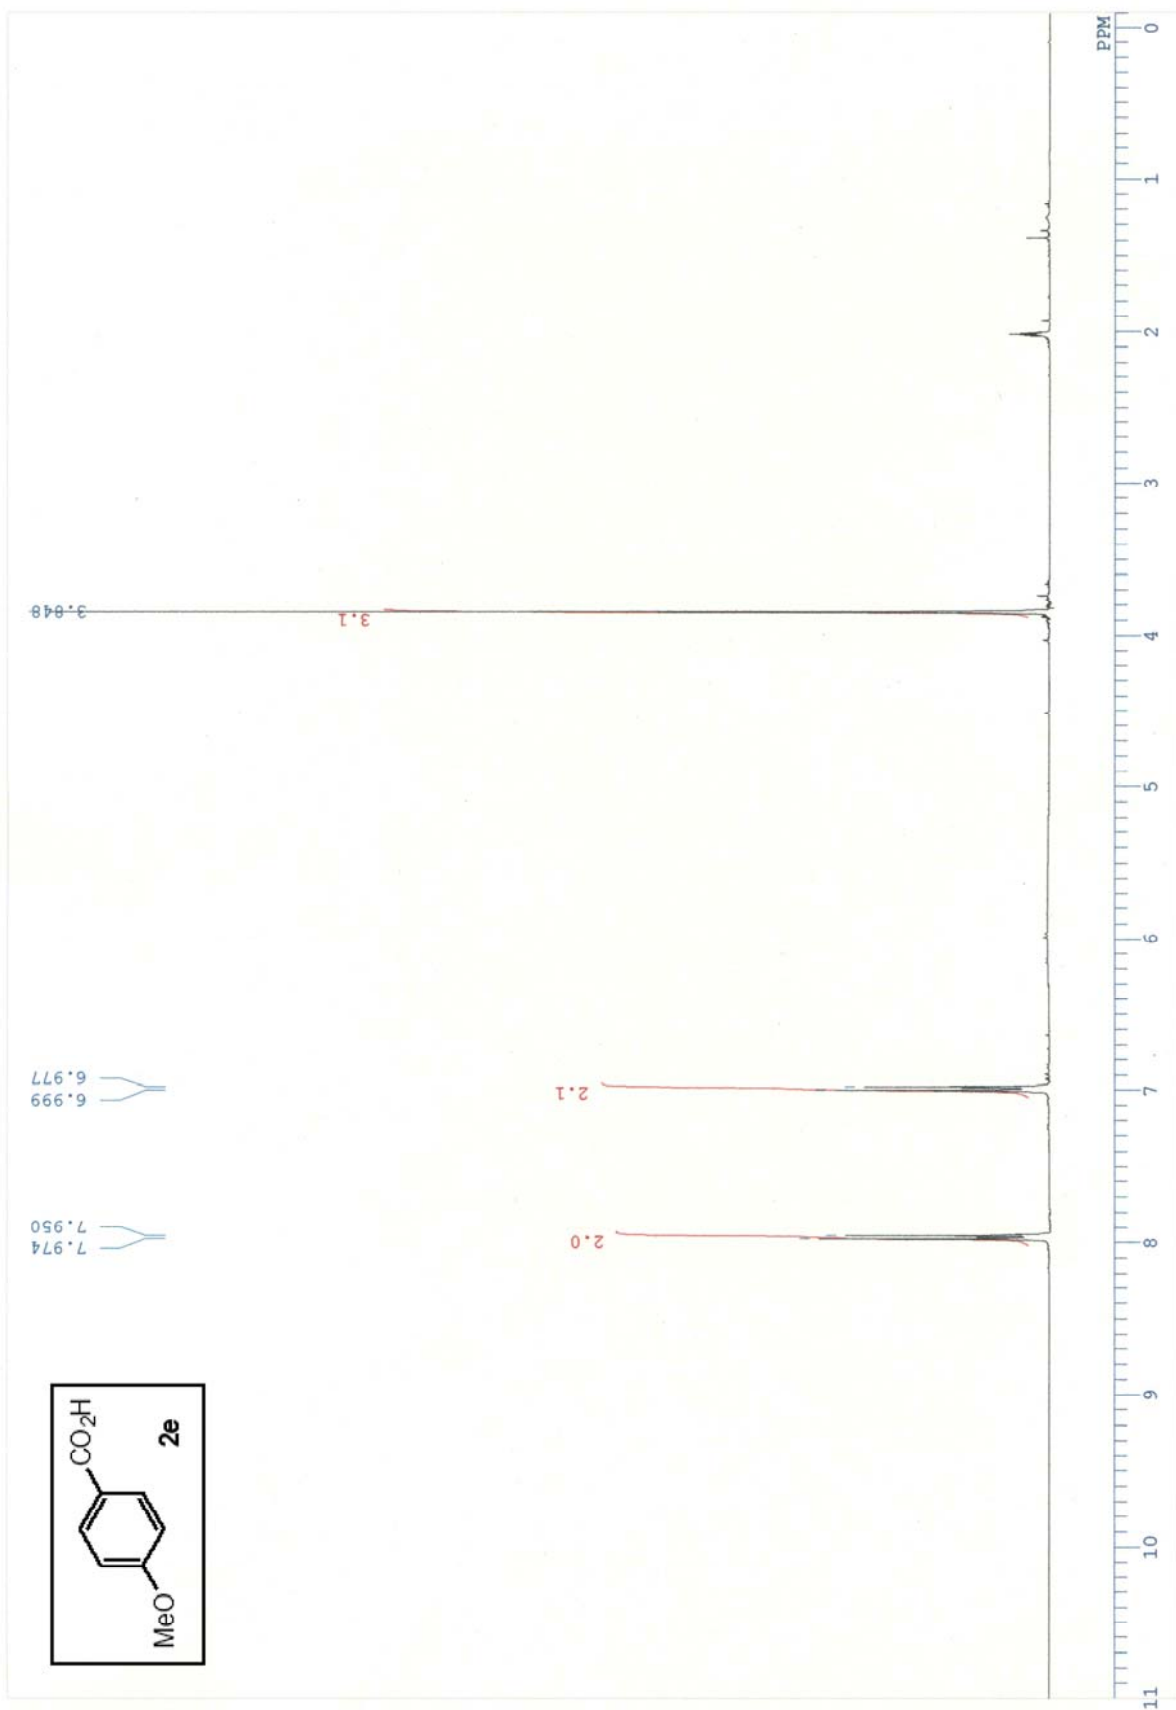

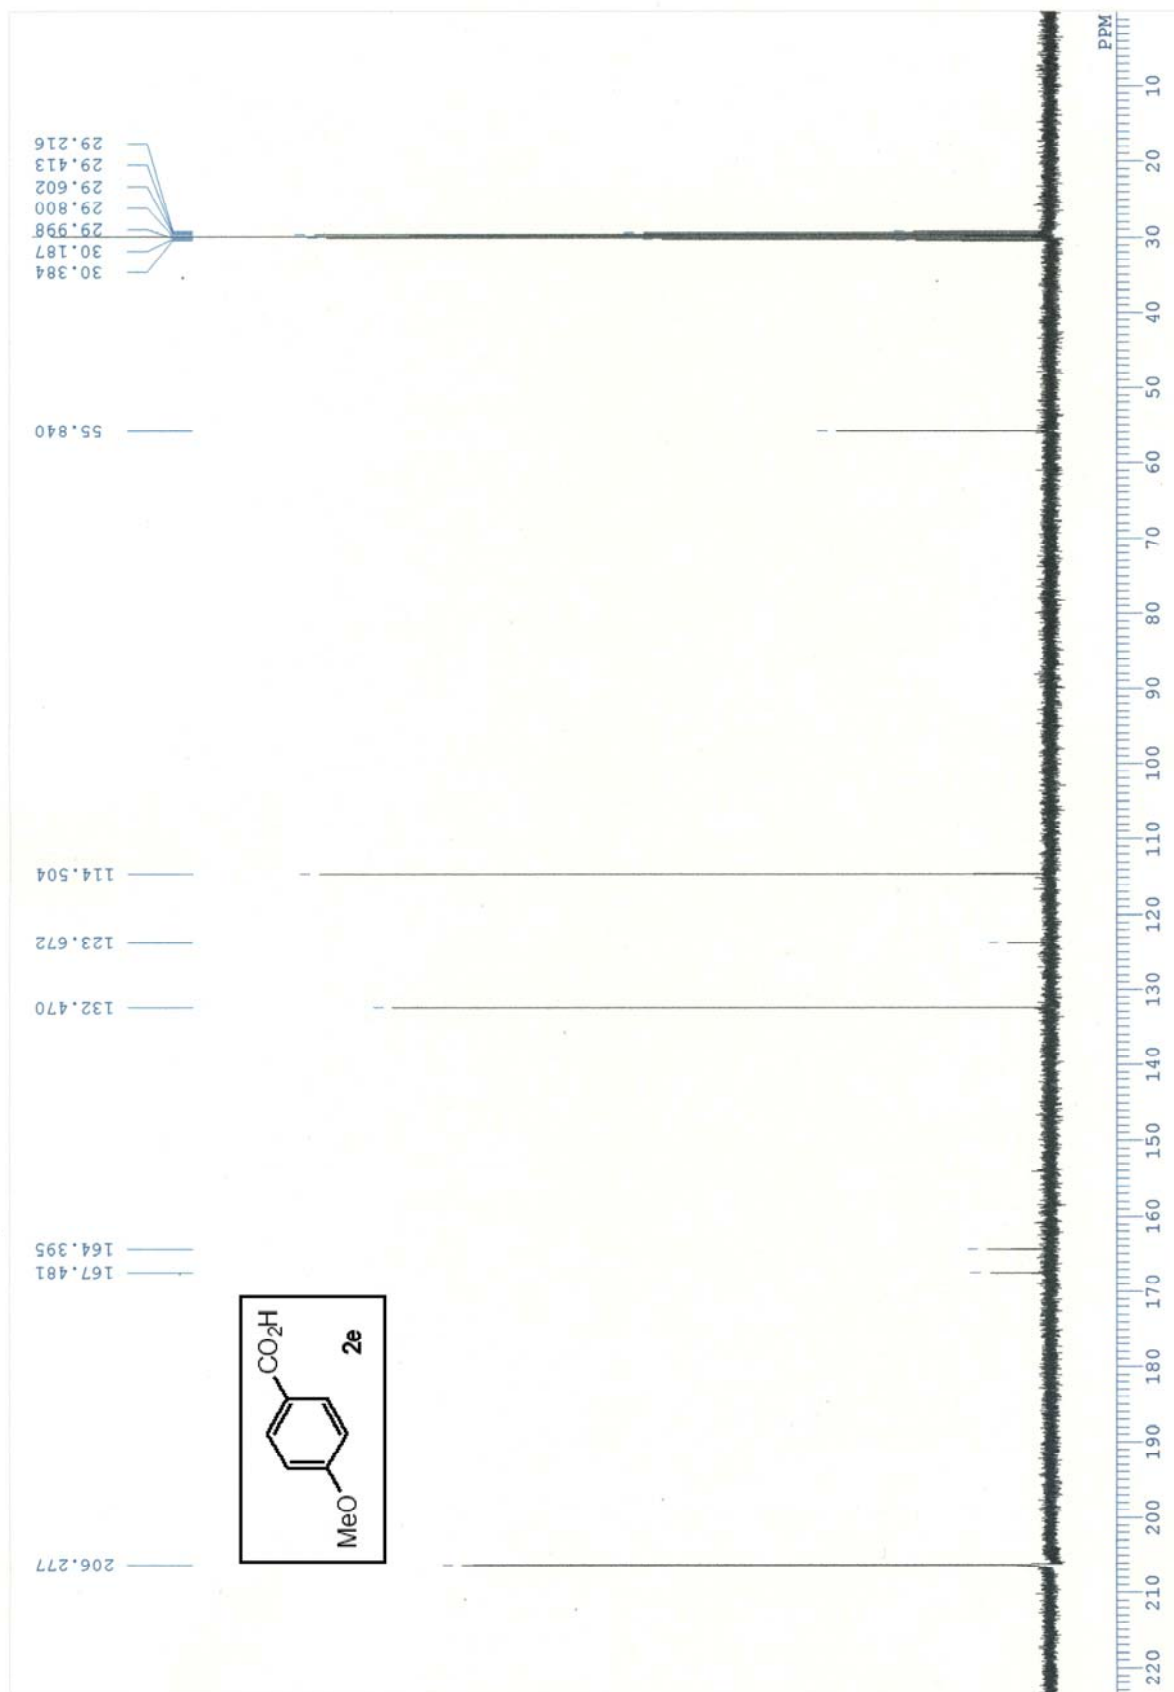

MLADD

Date Run: 9-18-2009 (Time Run: 09:27:34)  
Ionization mode: EI+

File: LR-09D709  
Instrument: SX102A  
Inlet: Direct

Scan: 2 R.T.: .03  
Base: m/z 135; 36.9%FS TIC: 21857144  
KH-451 HO

#Ions: 72

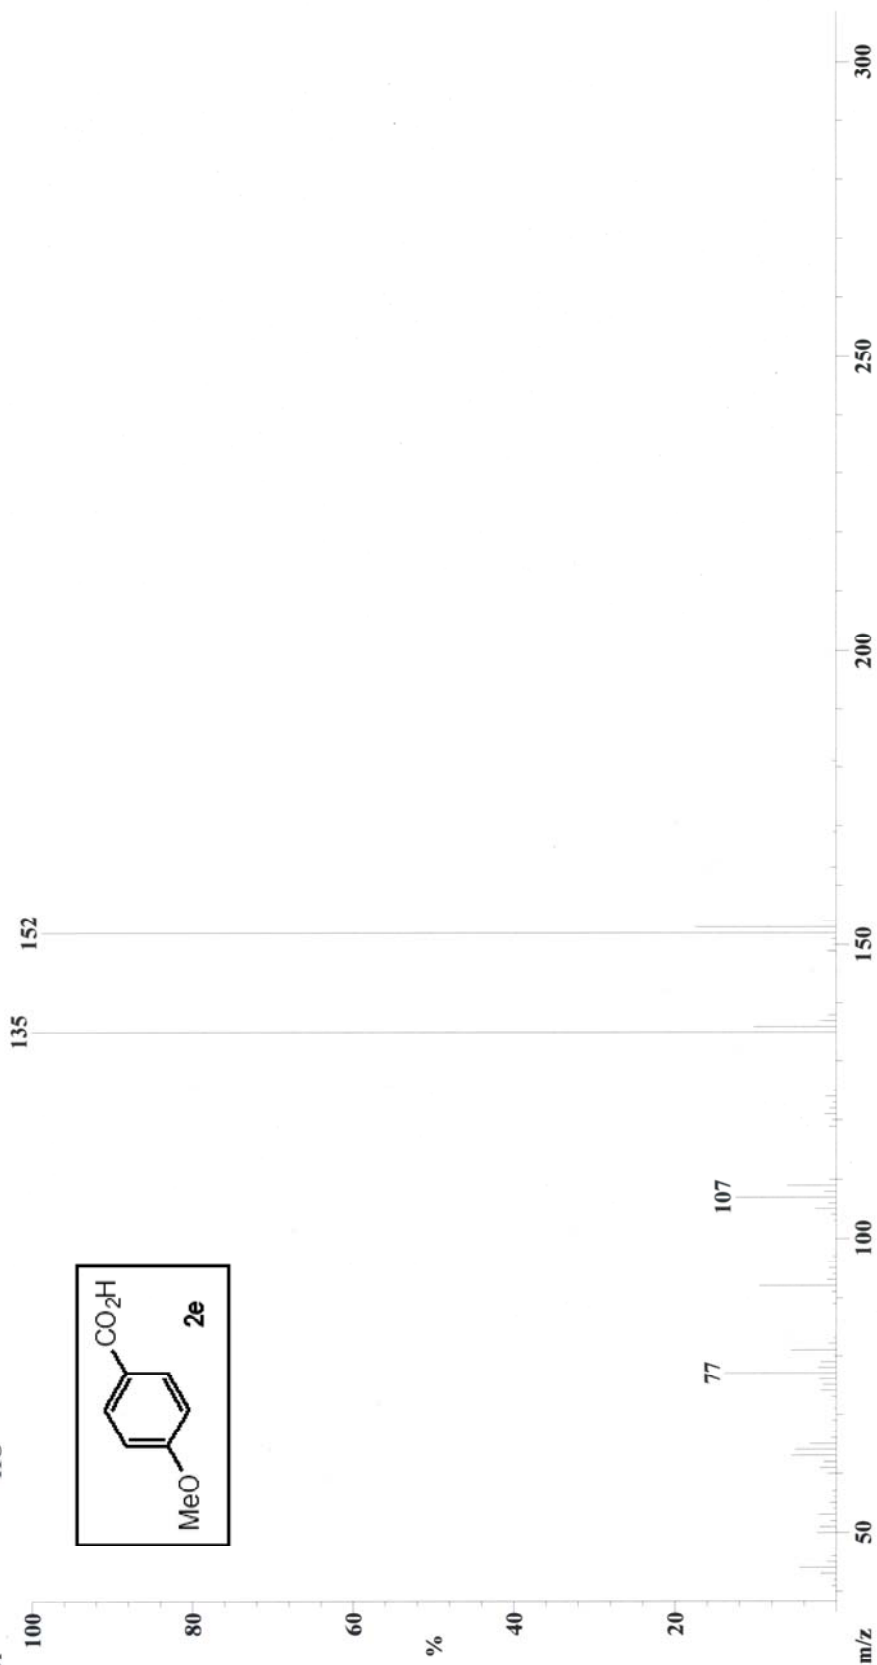



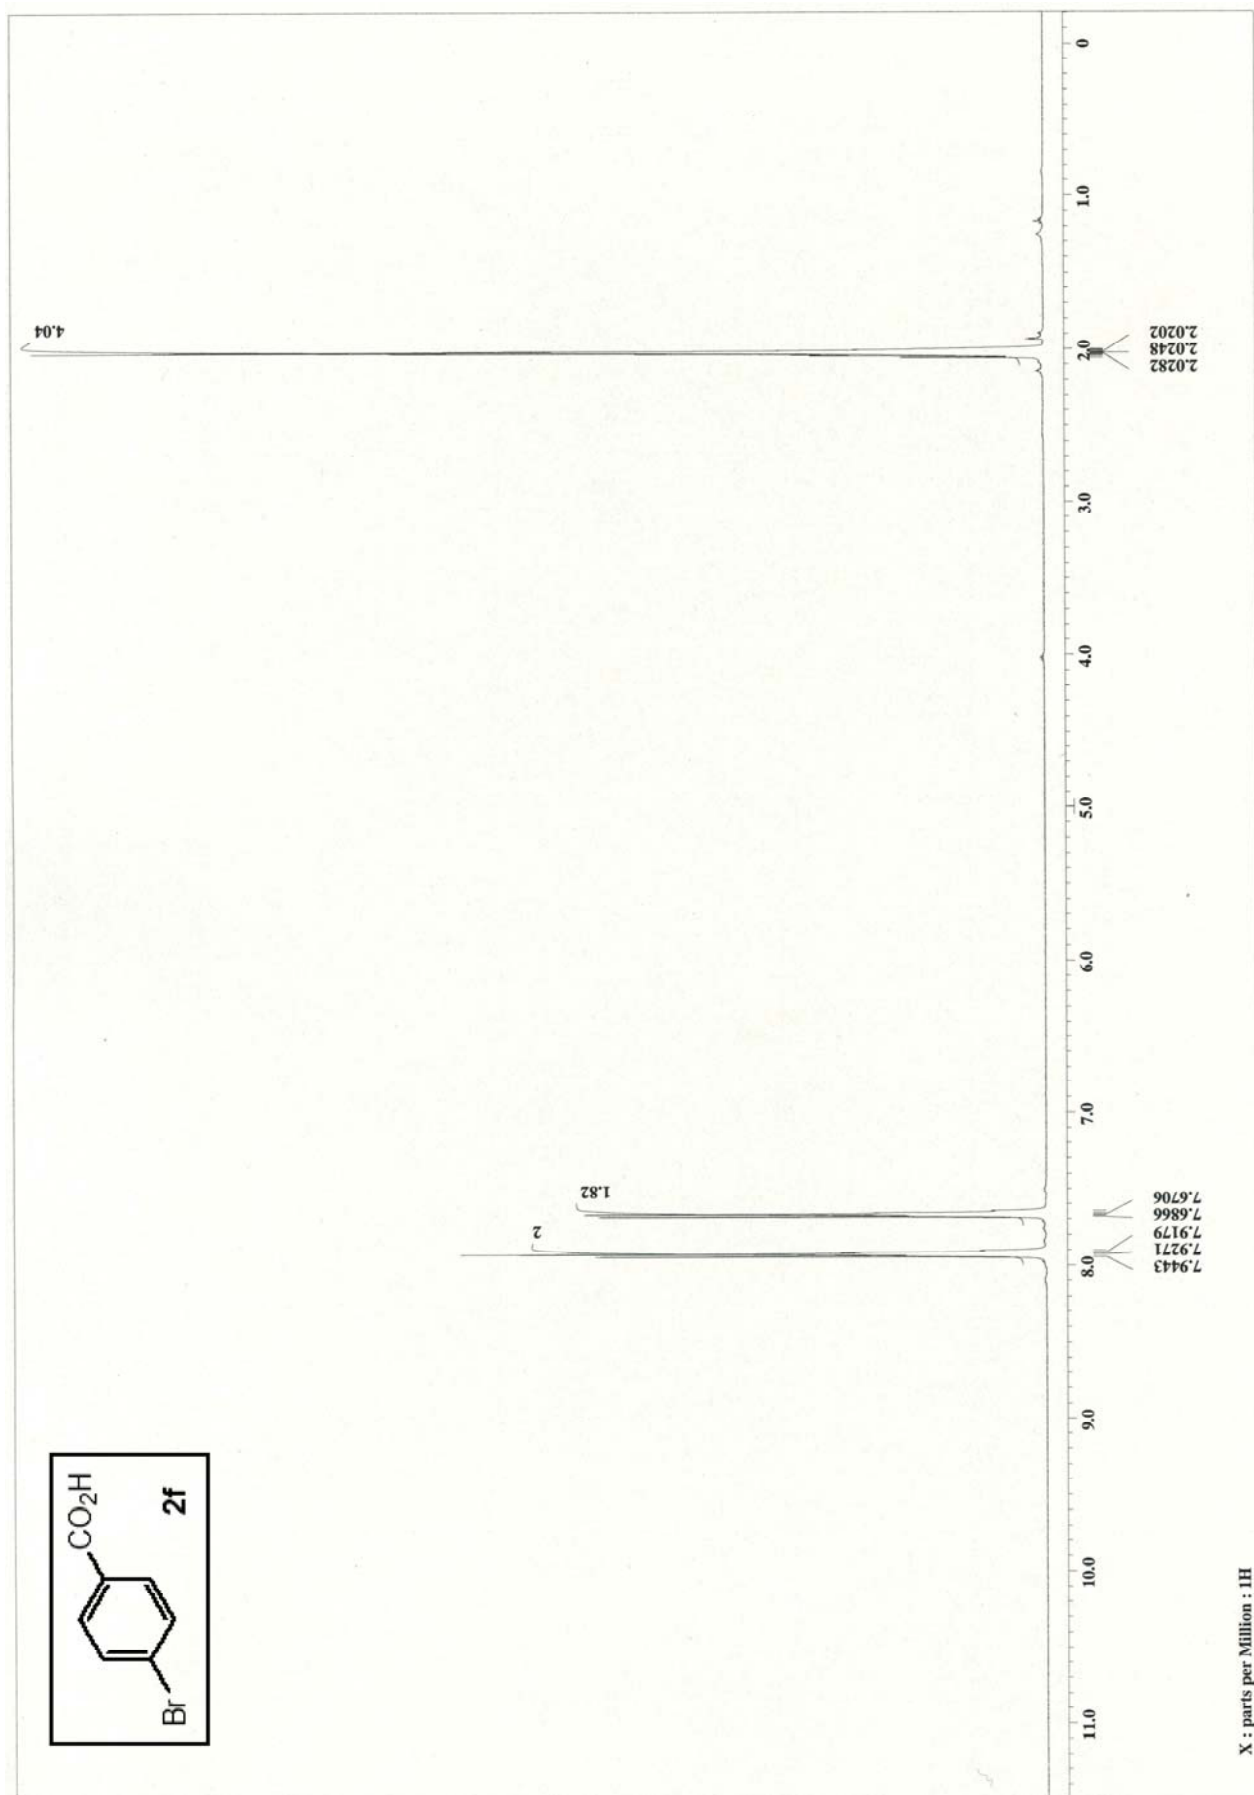

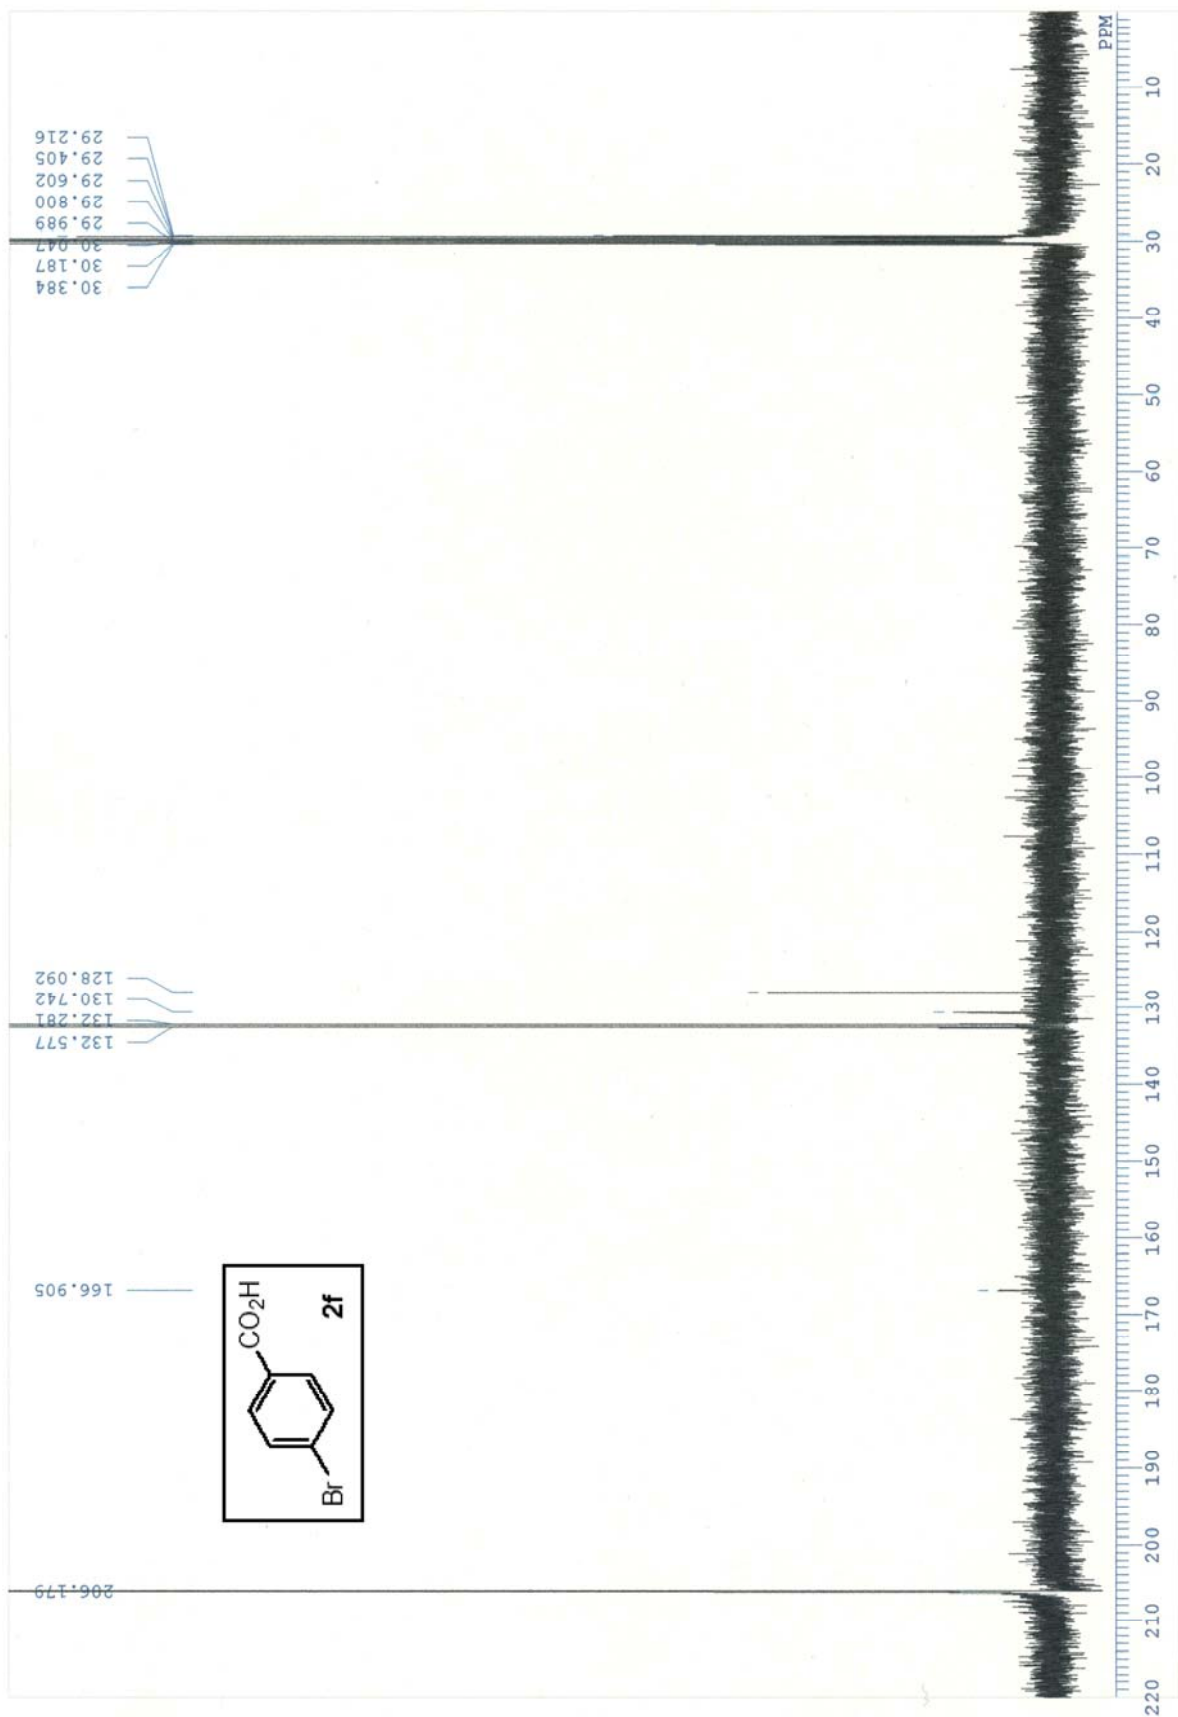

VLADD

File: LR-09D738  
Instrument: SX102A  
Inlet: Direct

Date Run: 9-24-2009 (Time Run: 13:41:05)  
Ionization mode: E1+

Scan: 26 R.T.: .83  
Base: m/z 200; 94.3%FS TIC: 97282090  
KH-453 HO

#Ions: 118

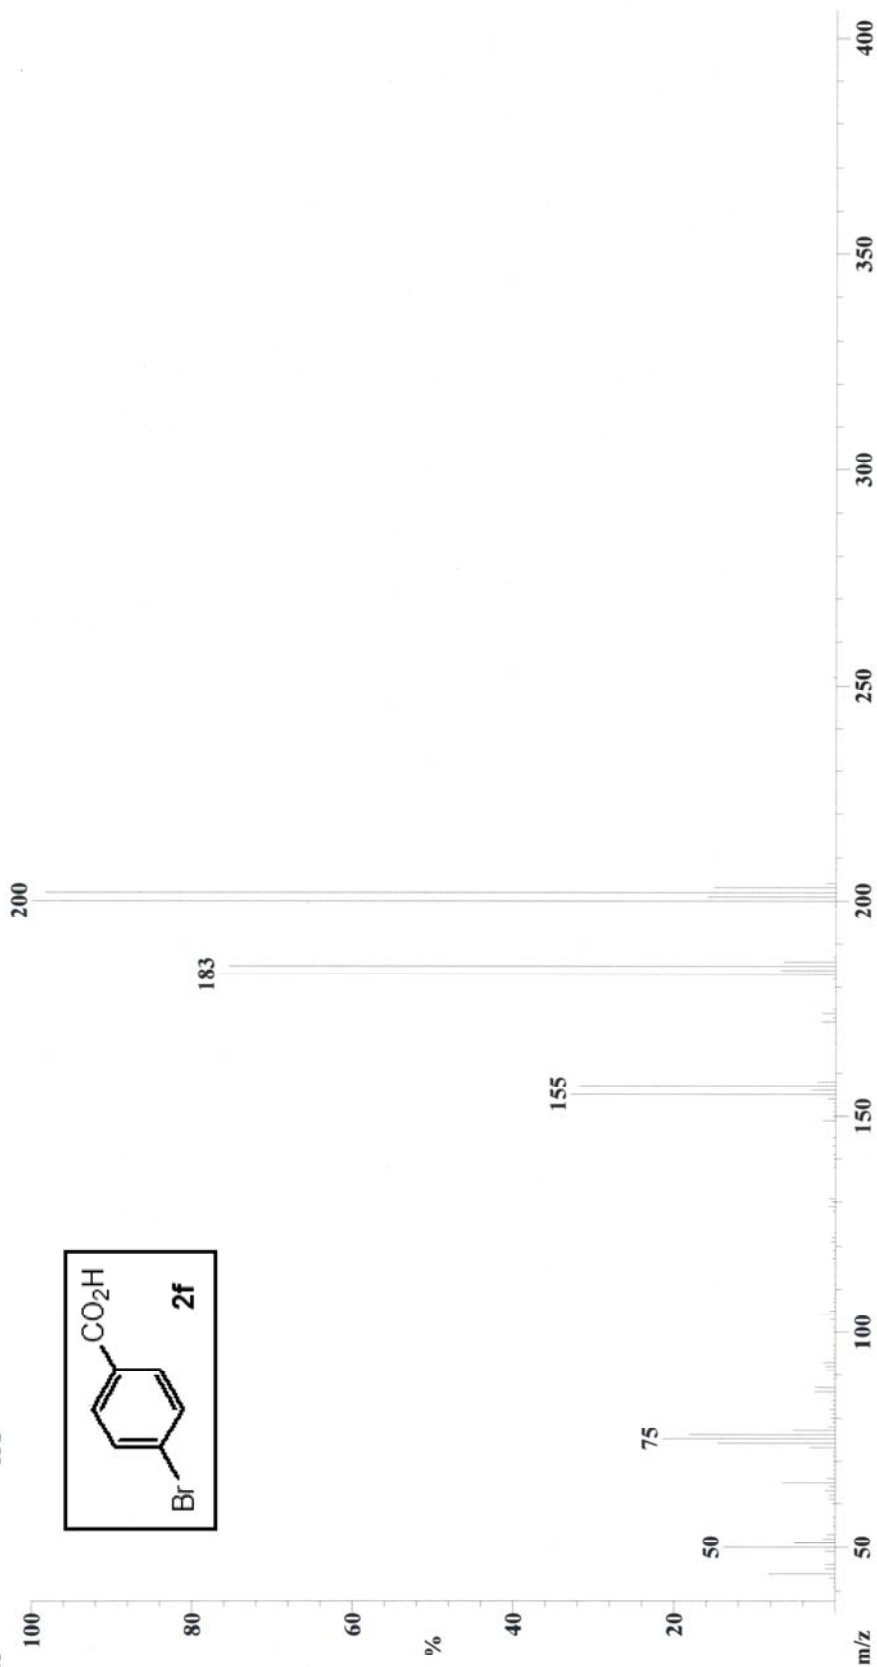

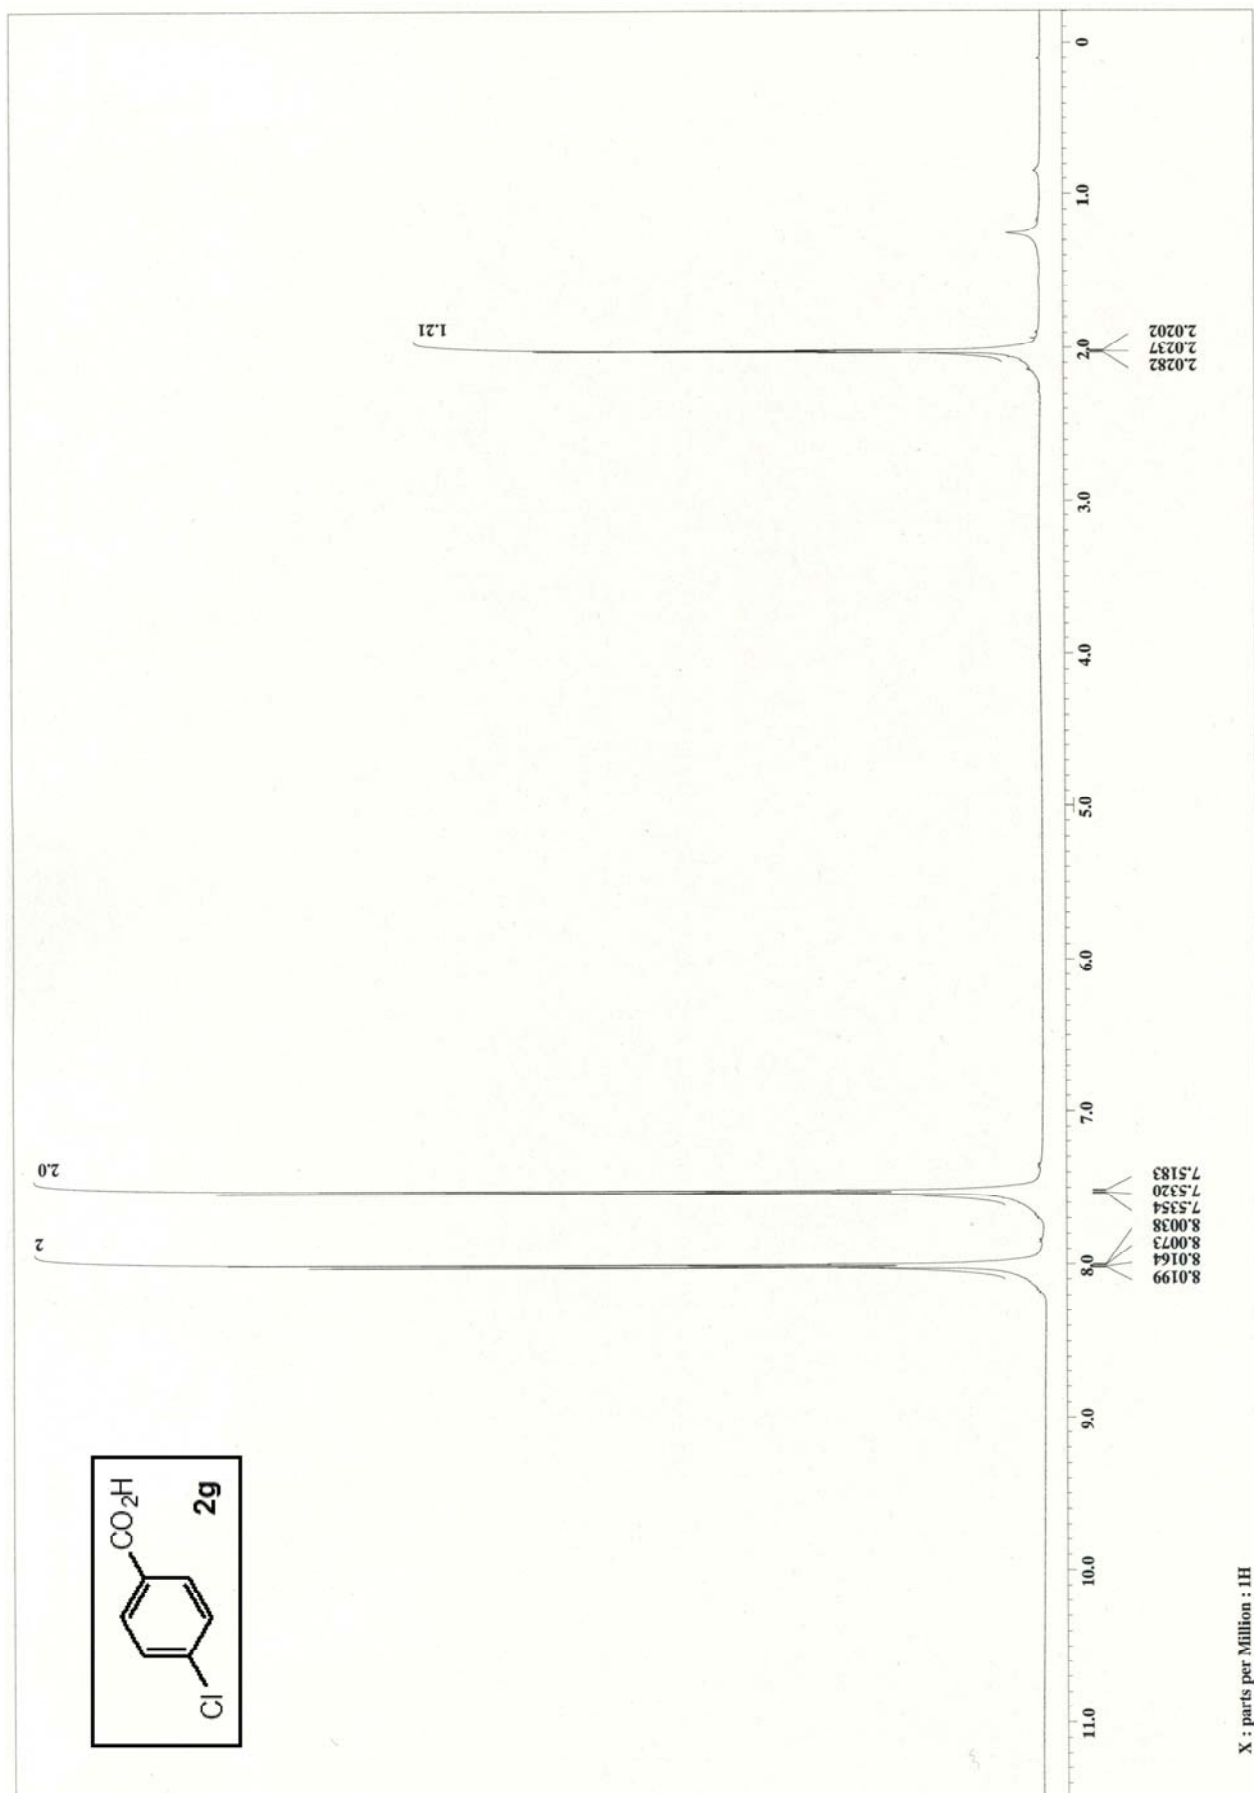

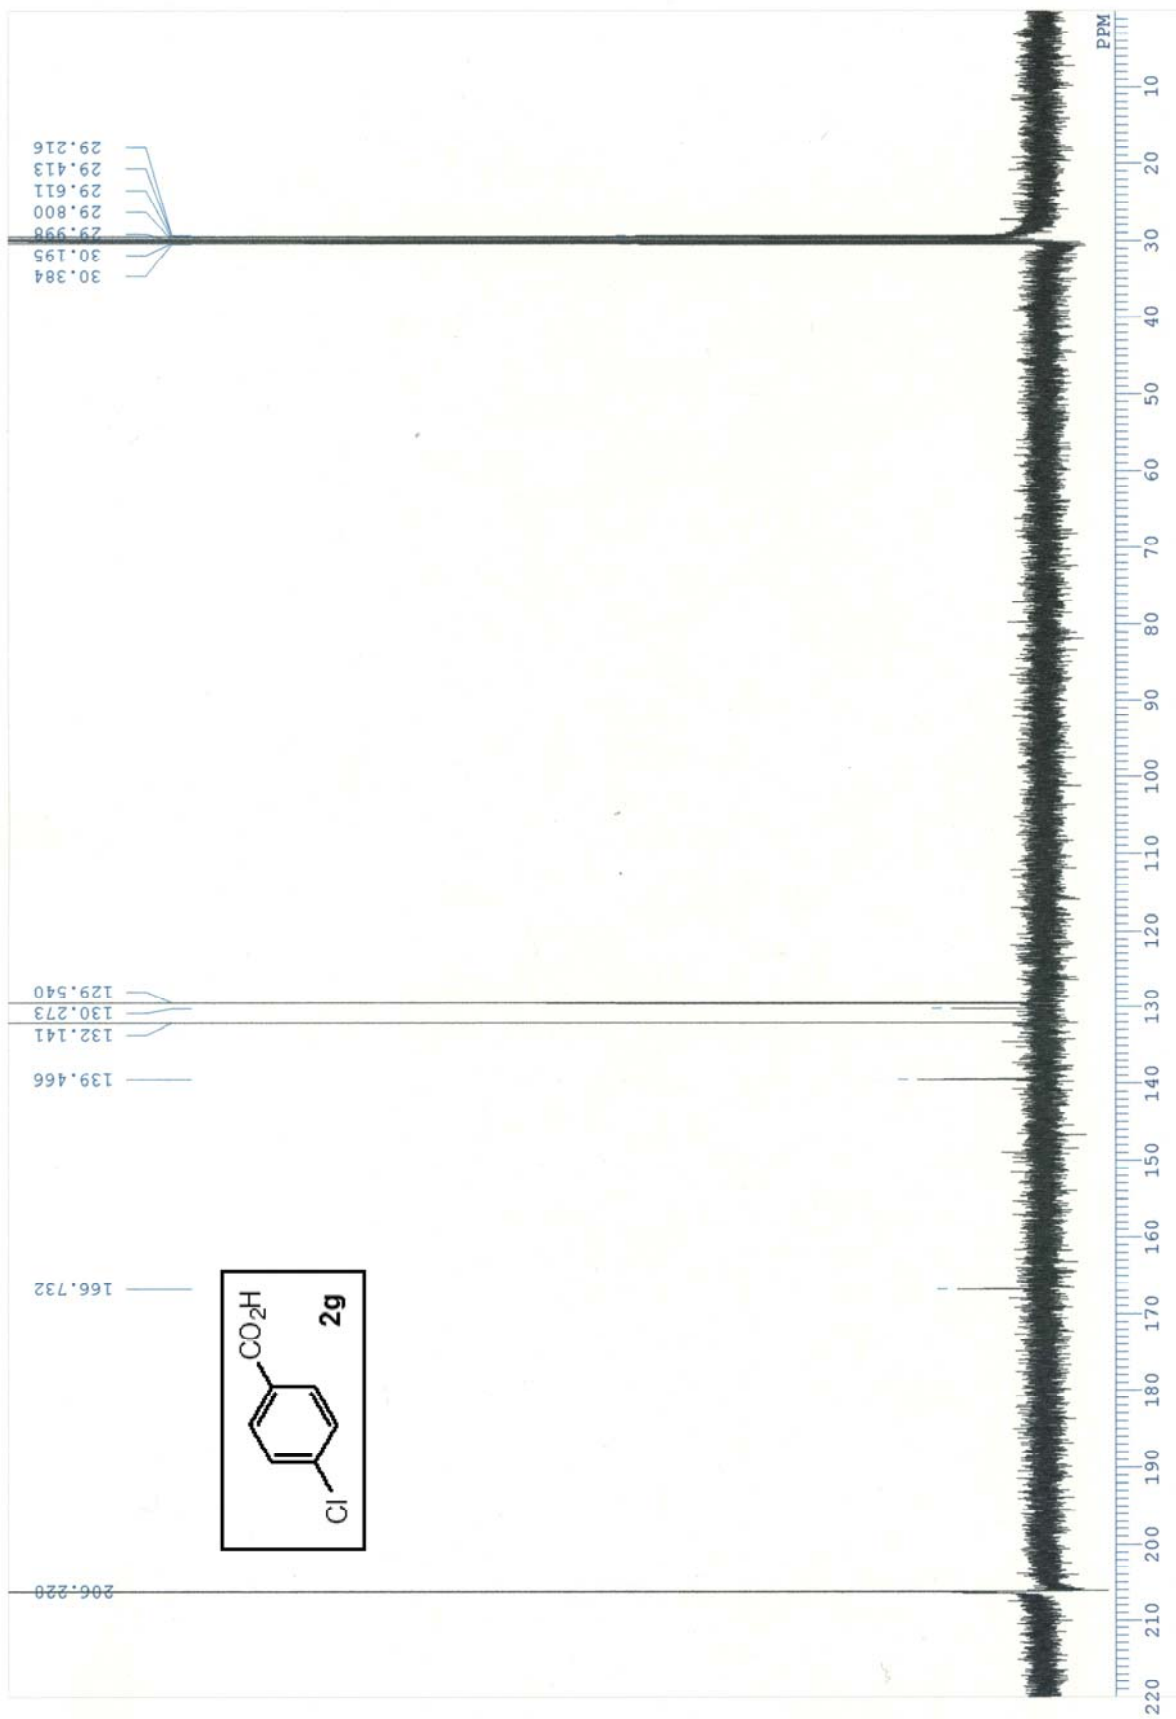

MASS

File: LR-09E084  
Instrument: SX102A  
Inlet: Direct

Date Run: 10-20-2009 (Time Run: 17:22:00)  
Ionization mode: E1+

Scan: 14 R.T.: .43  
Base: m/z 156, 84.4%FS TIC: 54765921  
KH-488 HO

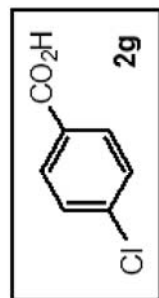

#Ions: 79

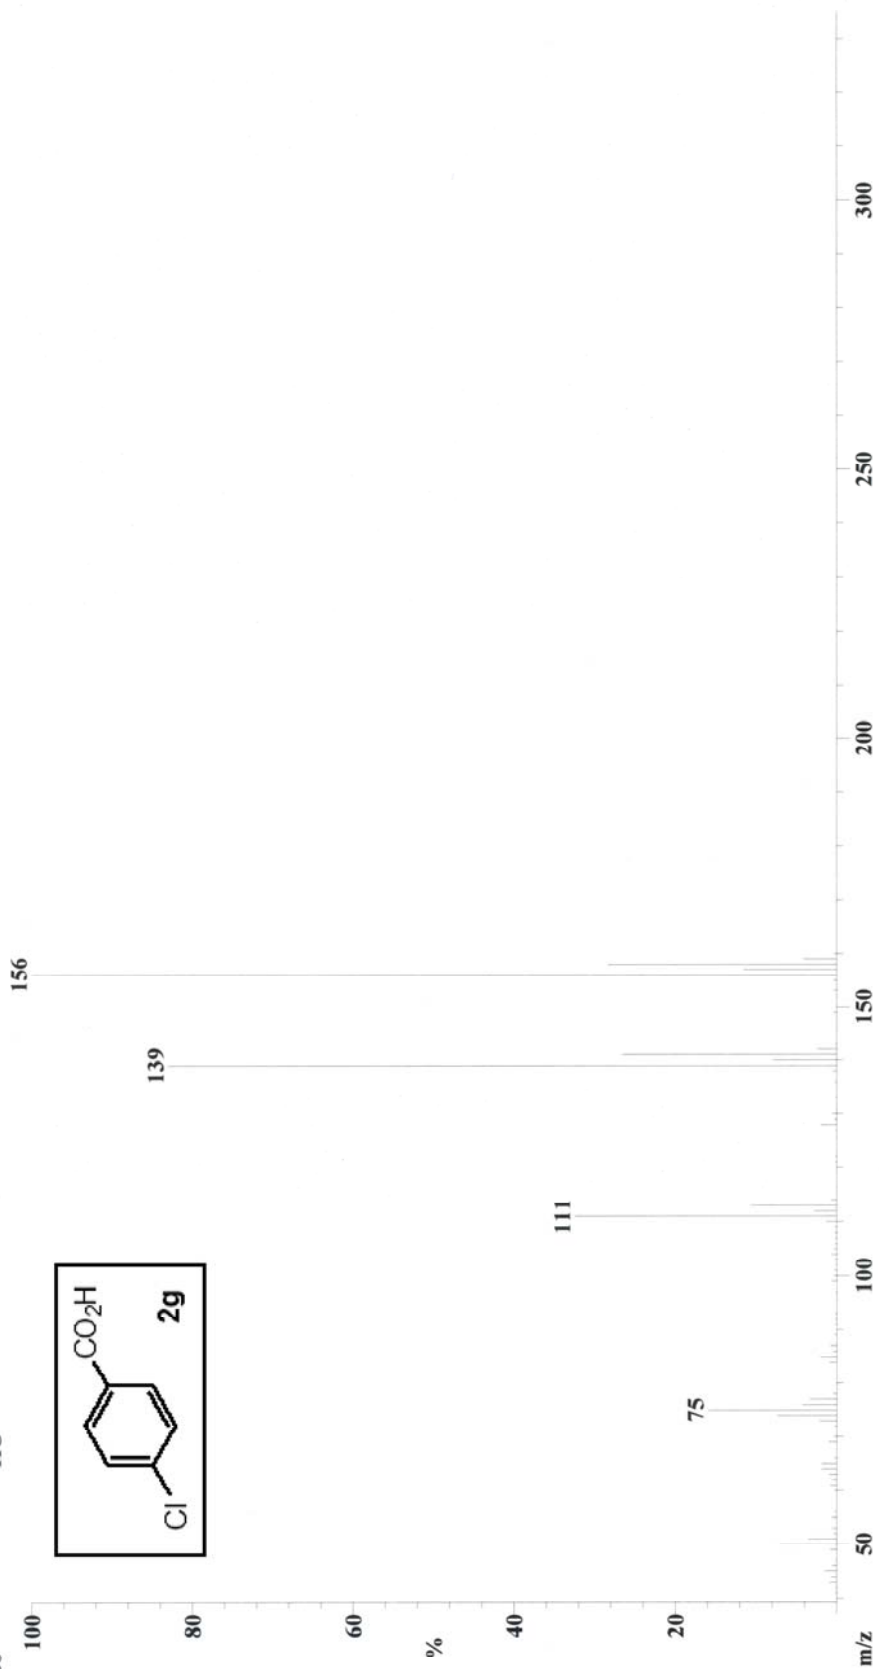

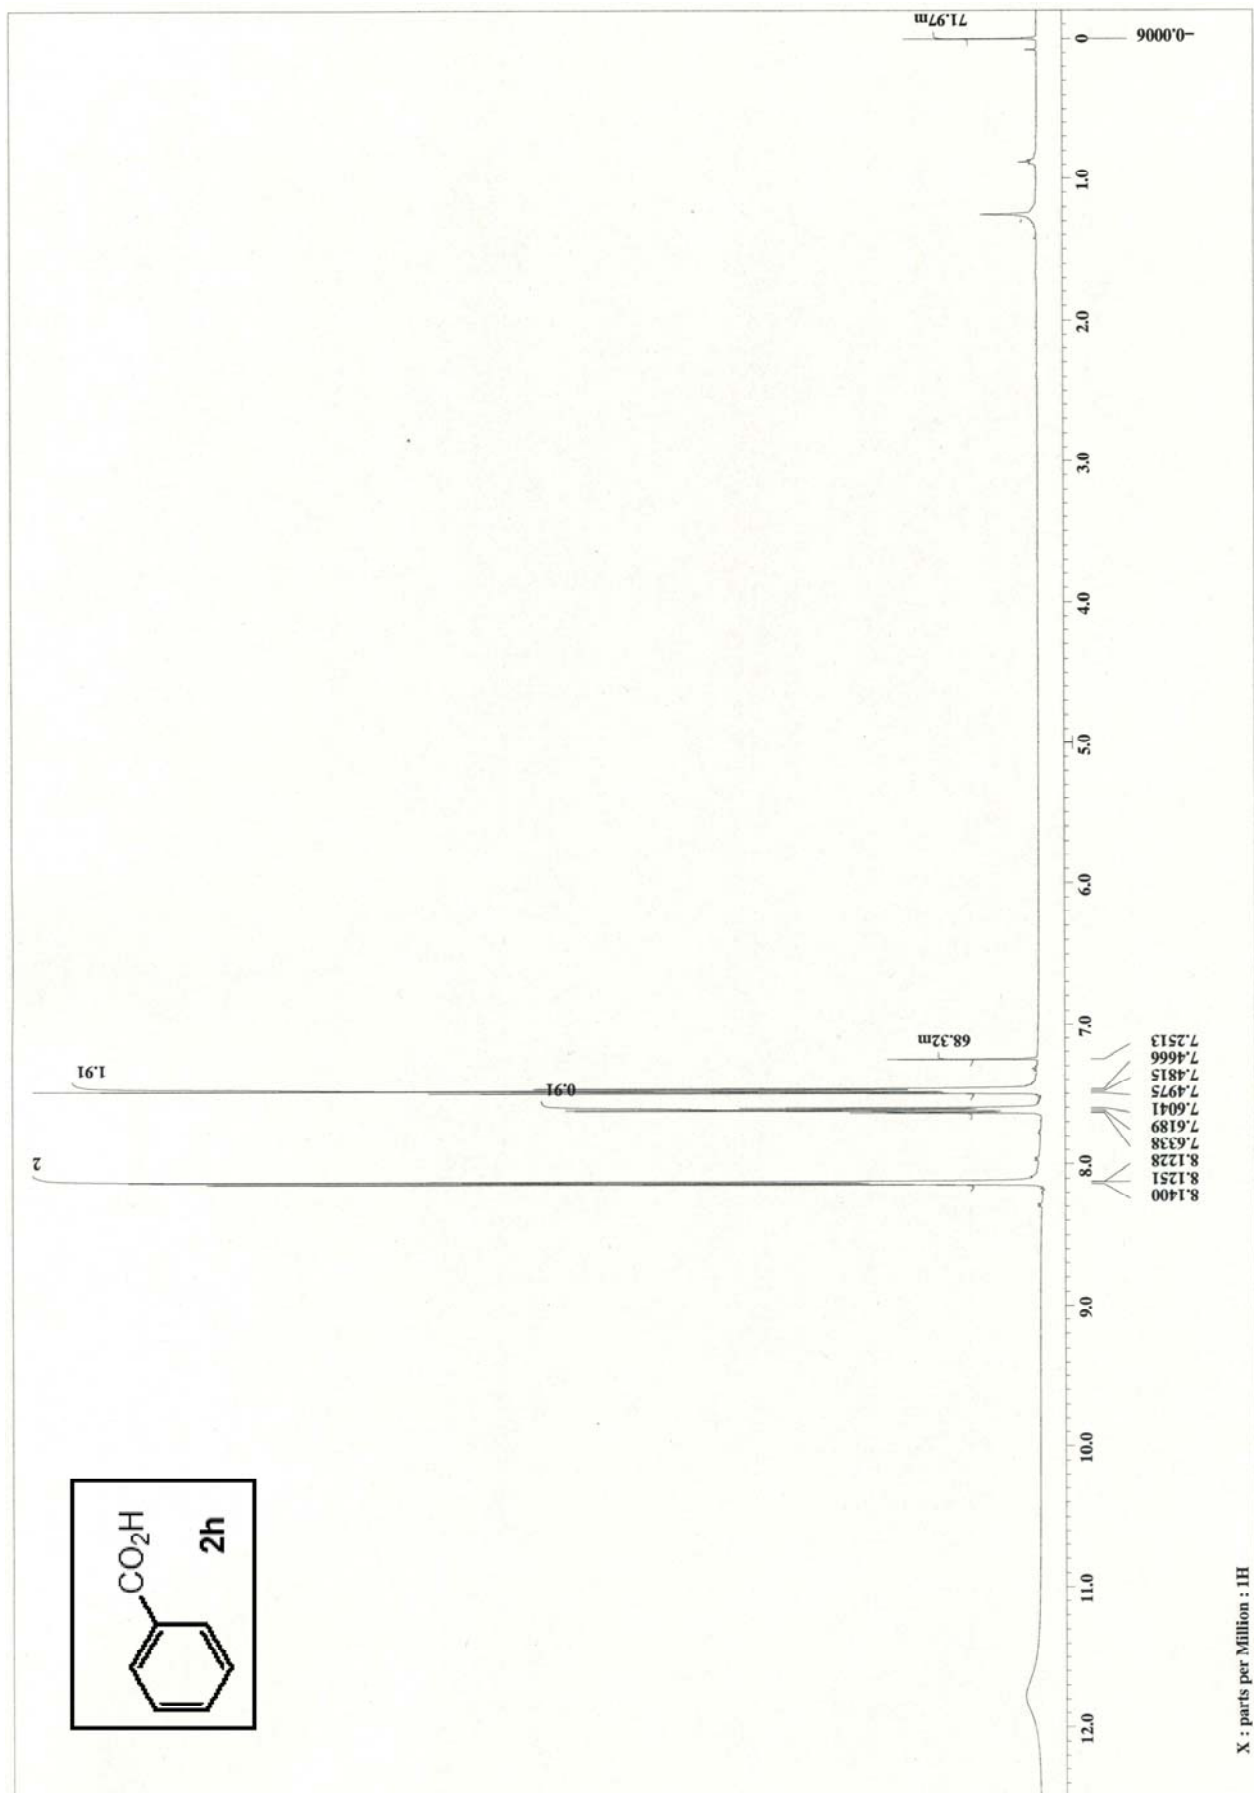

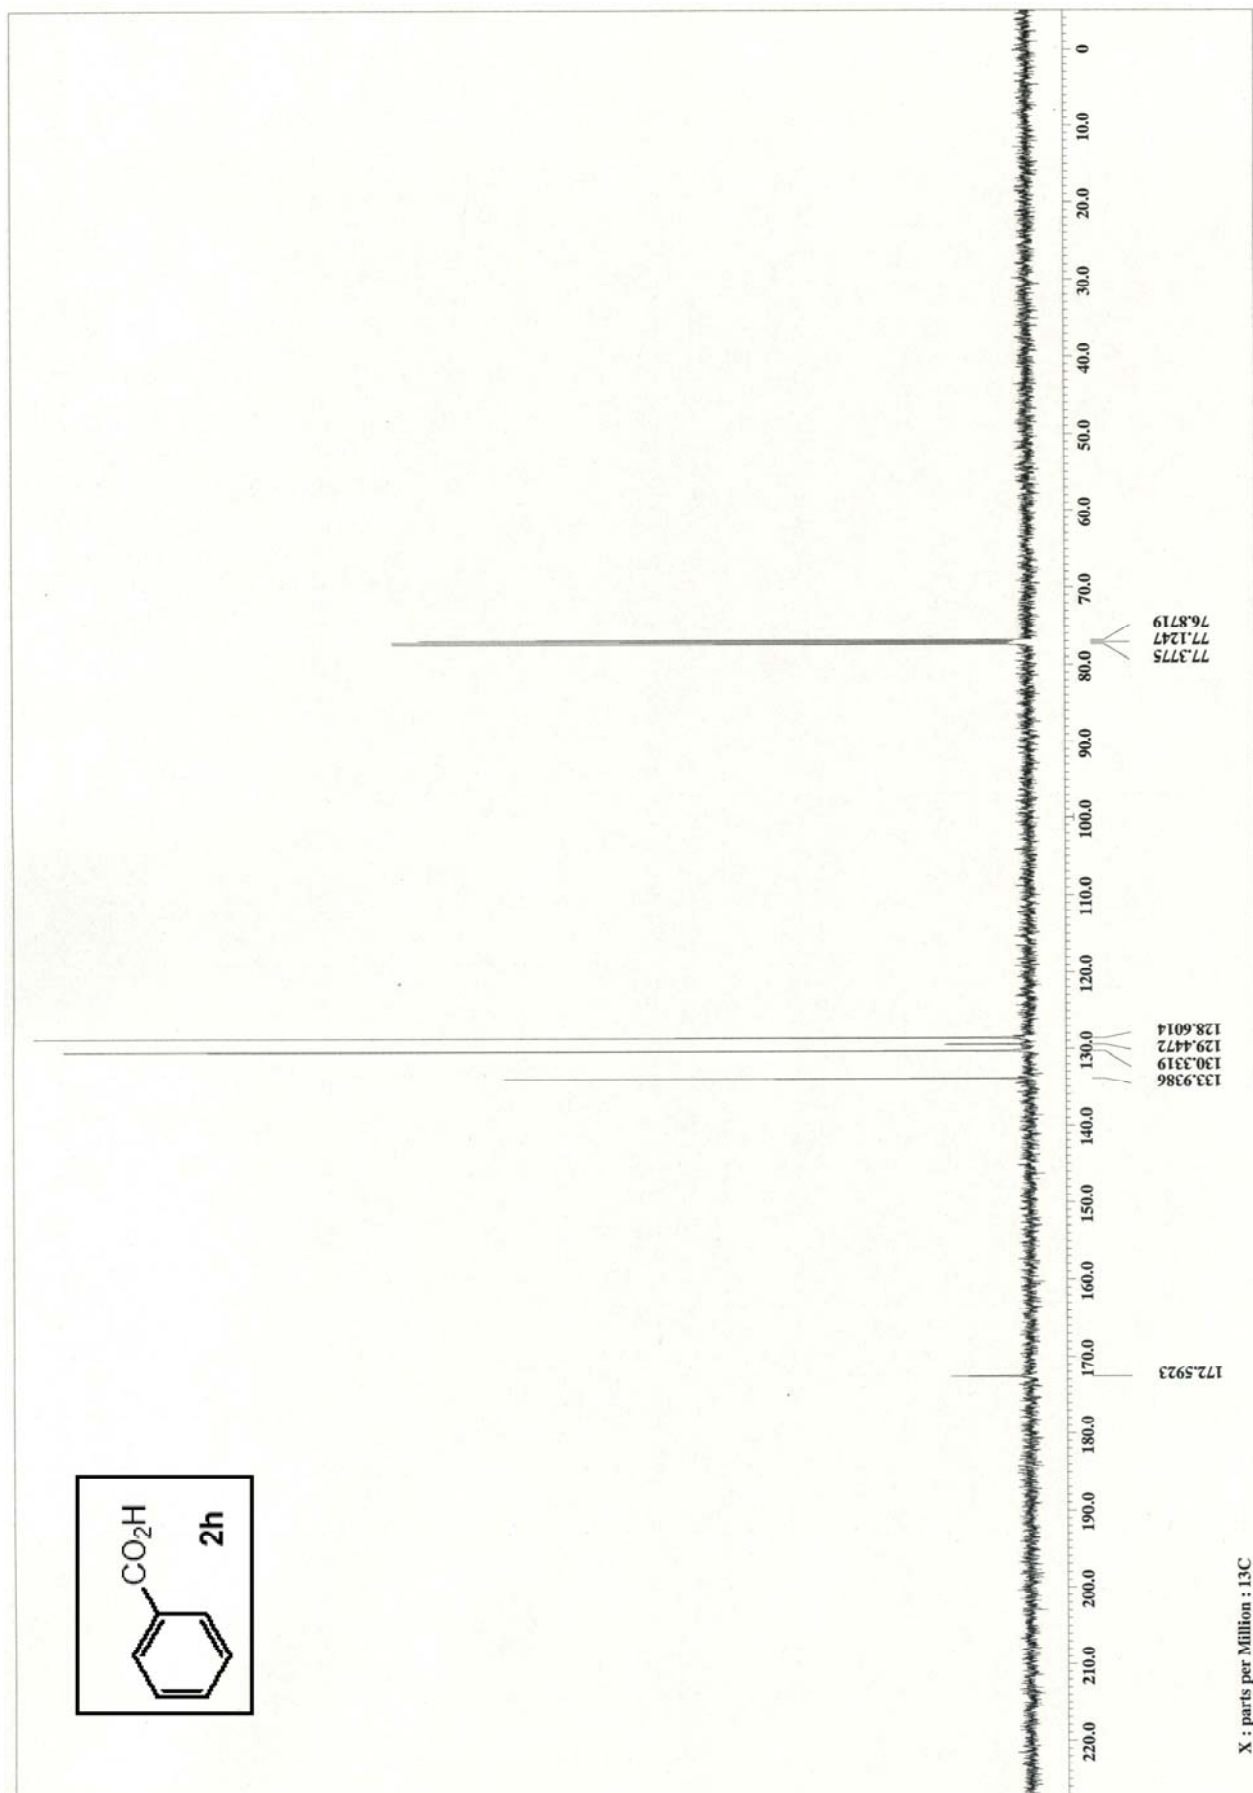



1117133

File: LR-09E339  
Instrument: SX102A  
Inlet: Direct

Date Run: 11-5-2009 (Time Run: 16:01:33)  
Ionization mode: EI+

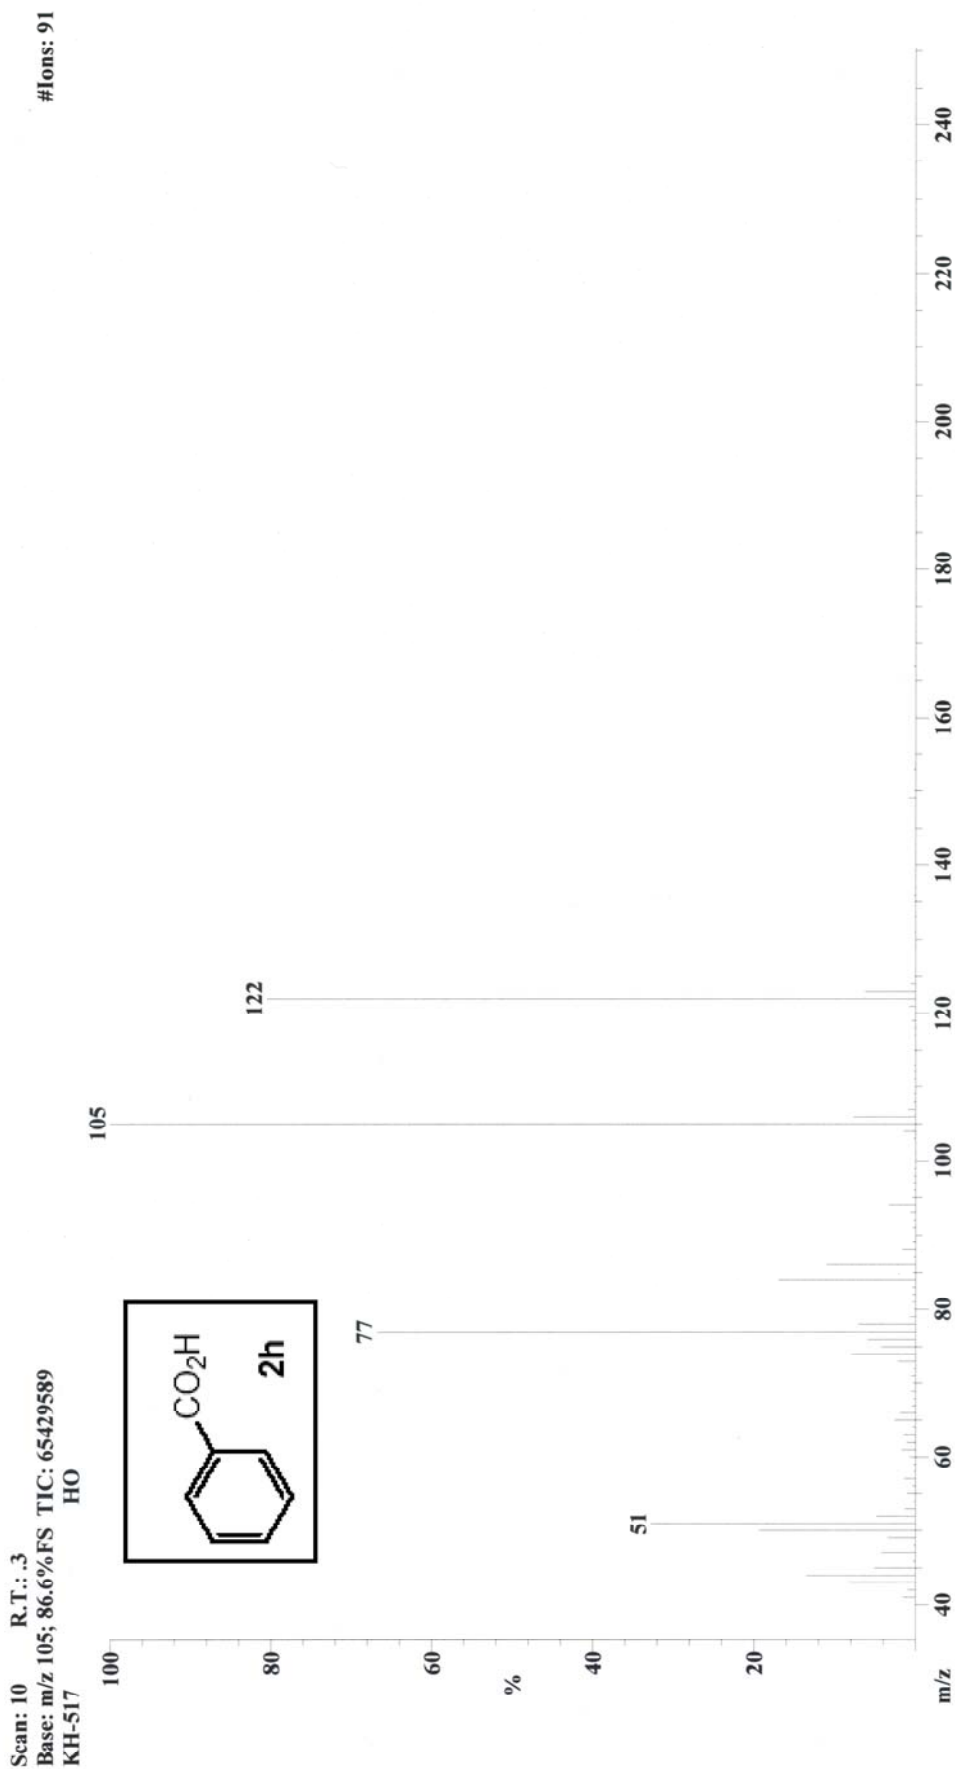

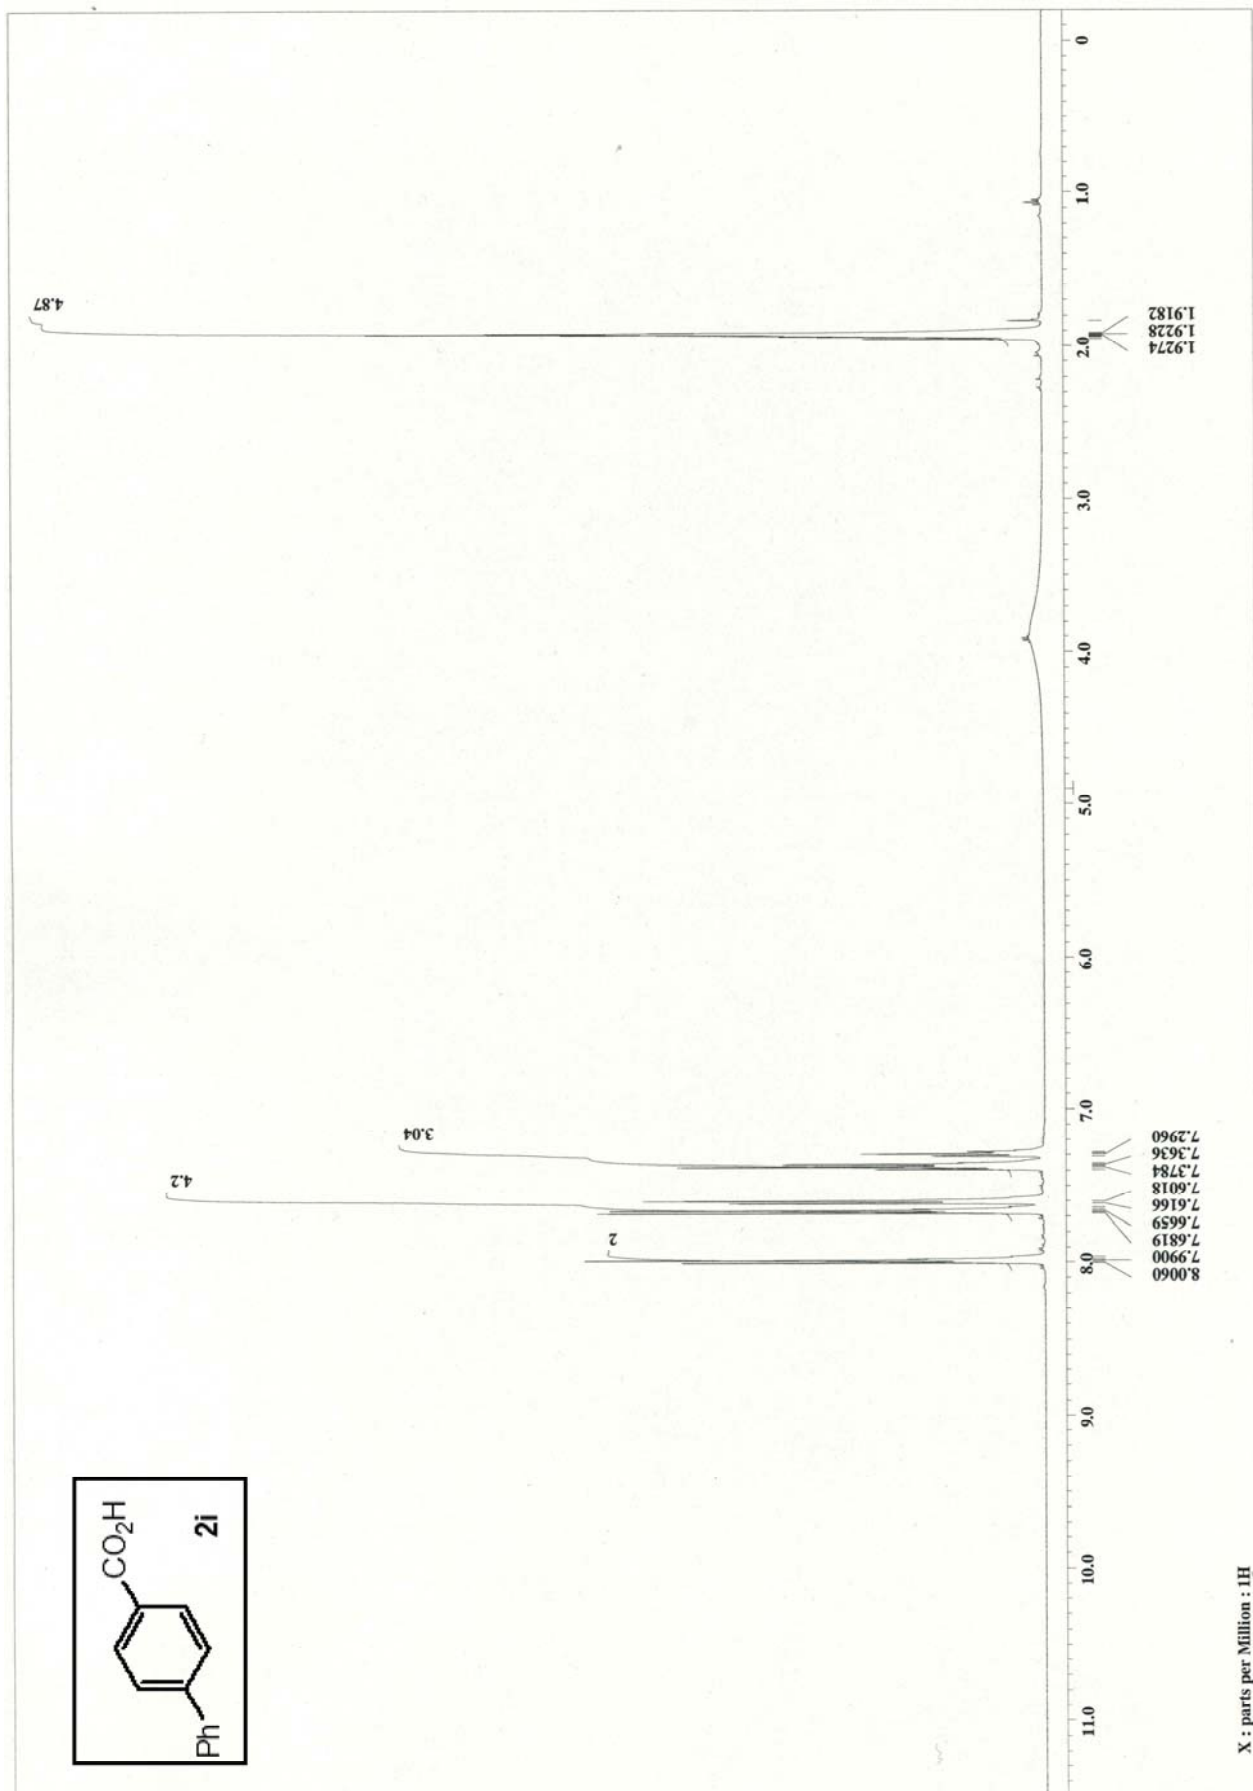

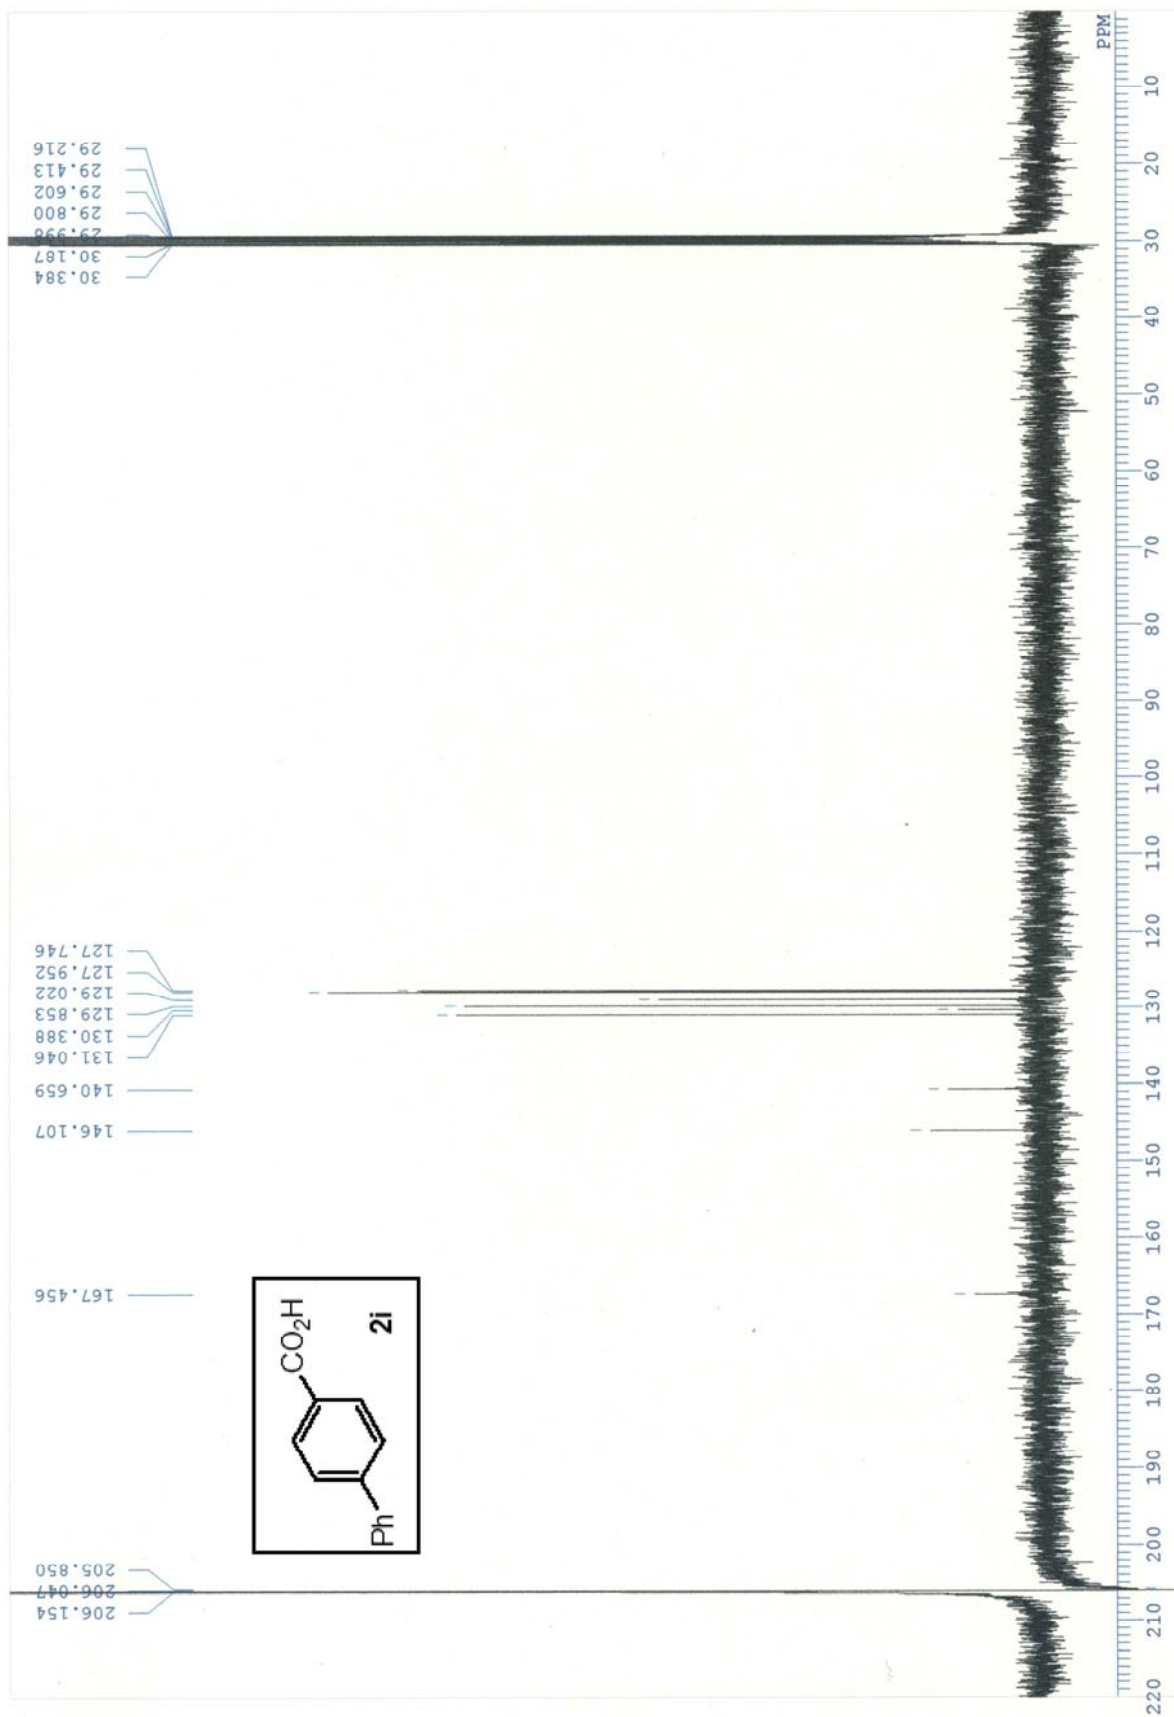

MASS

File: LR-09E098  
Instrument: SX102A  
Inlet: Direct

Date Run: 10-22-2009 (Time Run: 11:50:52)  
Ionization mode: E1+

Scan: 21 R.T.: .67 #Ions: 93  
Base: m/z 198, 75.8%FS TIC: 40452291  
KH-480 HO

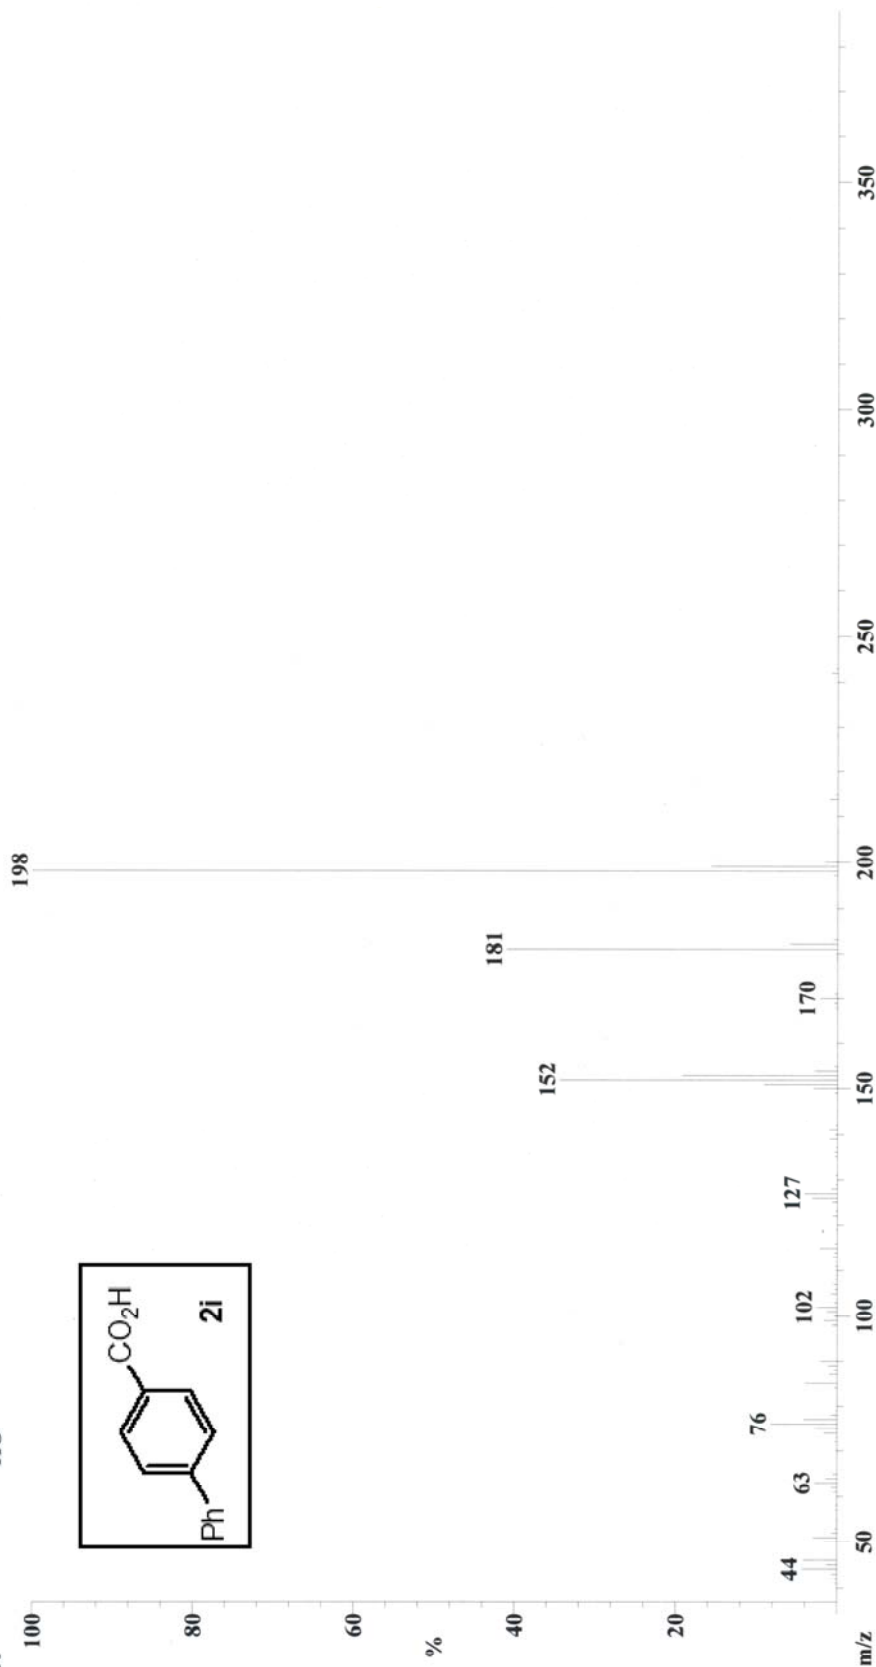

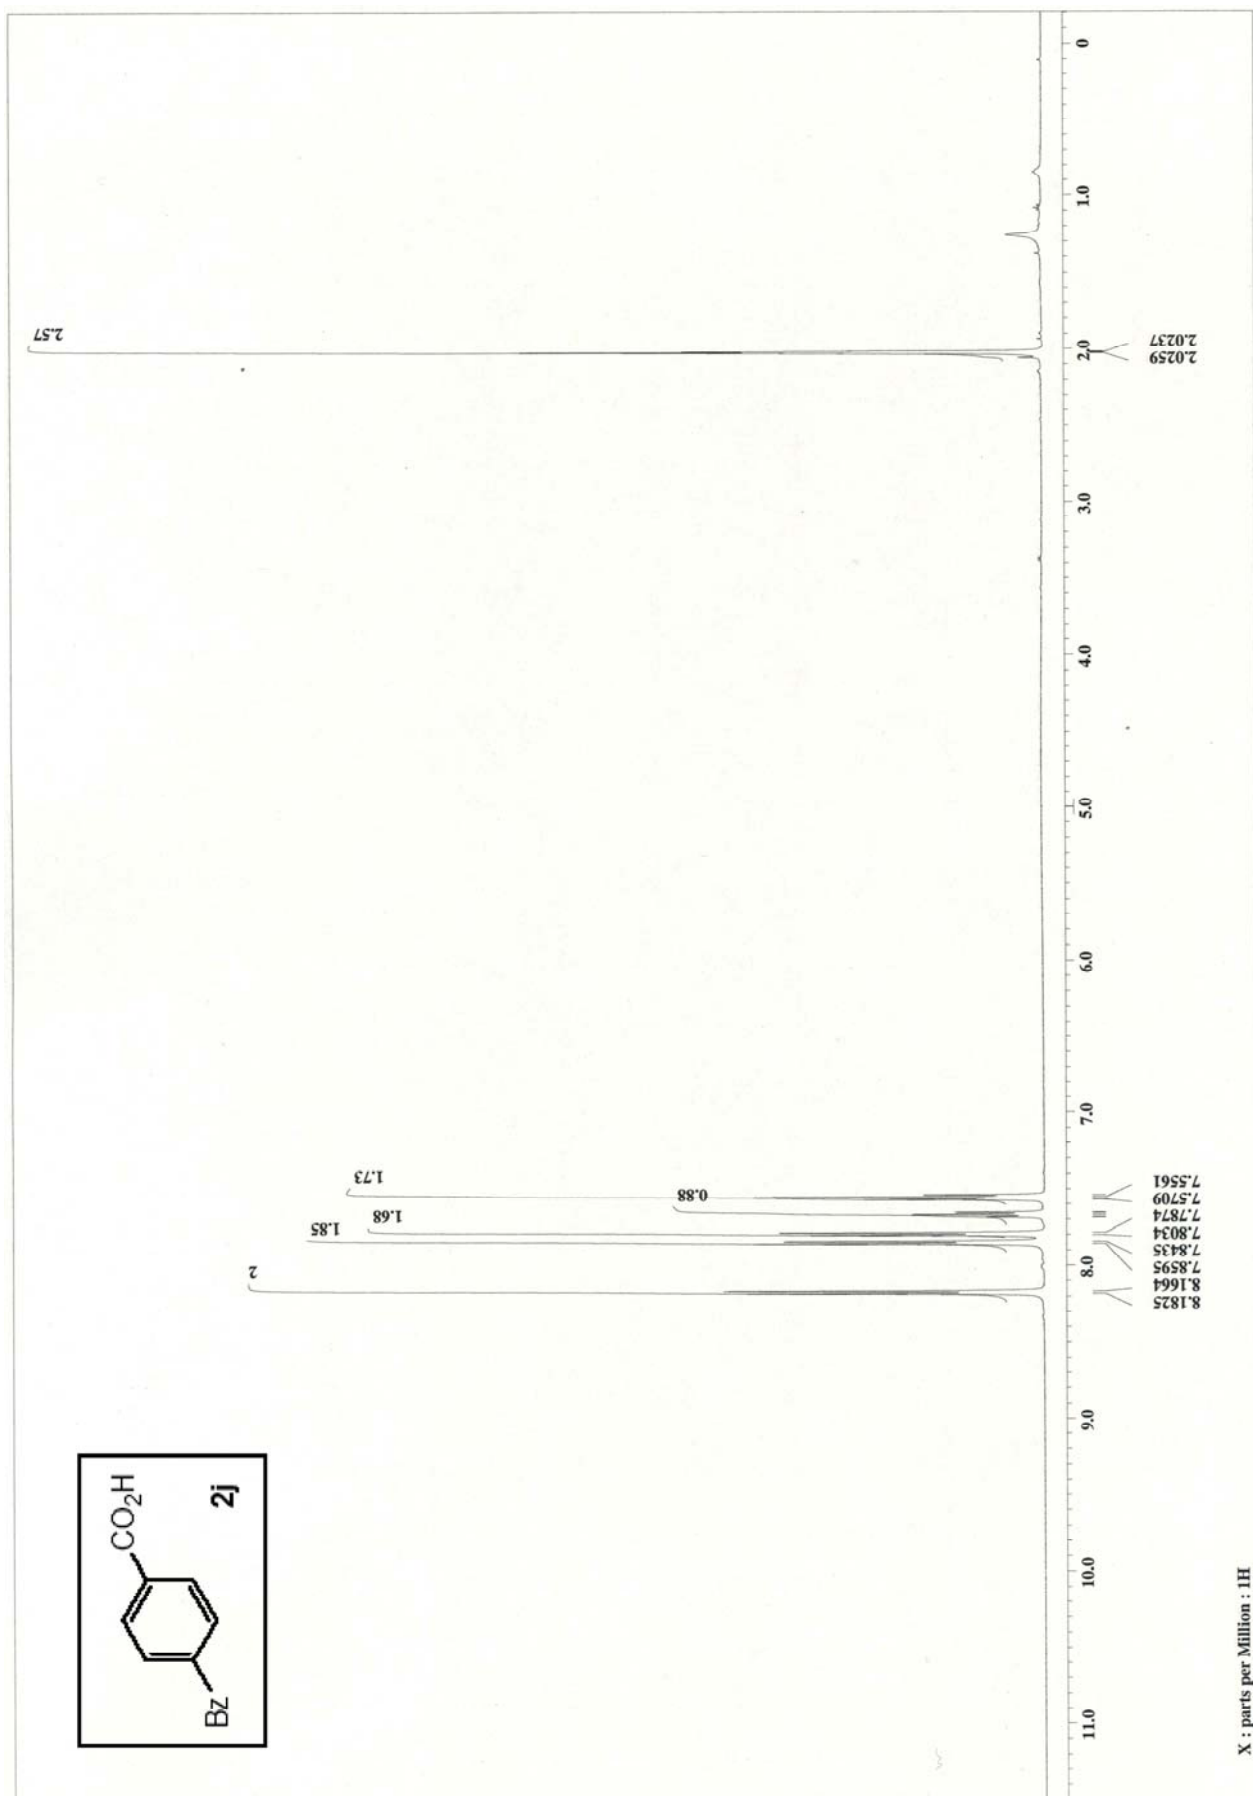

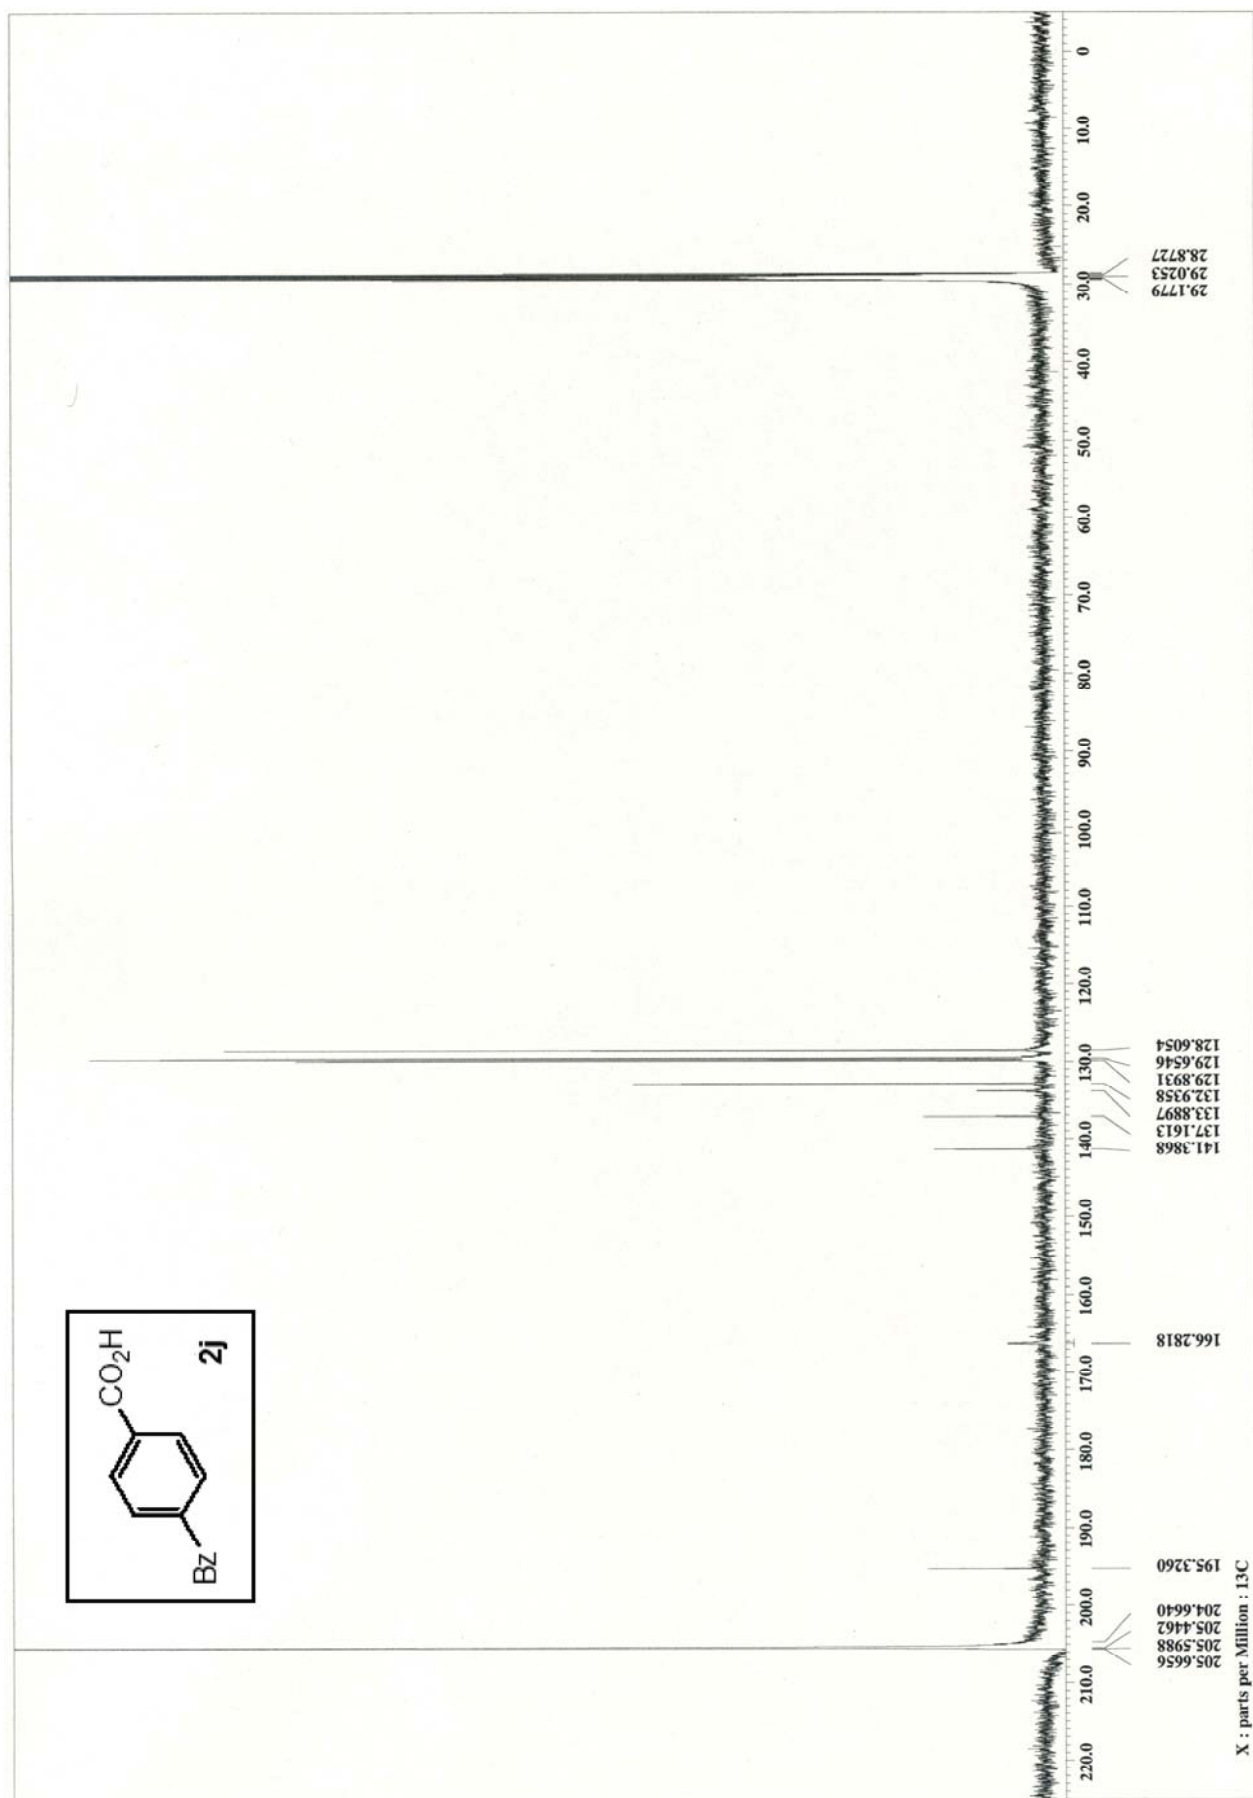

PLAD3

File: LR-09E427  
Instrument: SX102A  
Inlet: Direct

Date Run: 11-9-2009 (Time Run: 17:27:23)  
Ionization mode: E1+

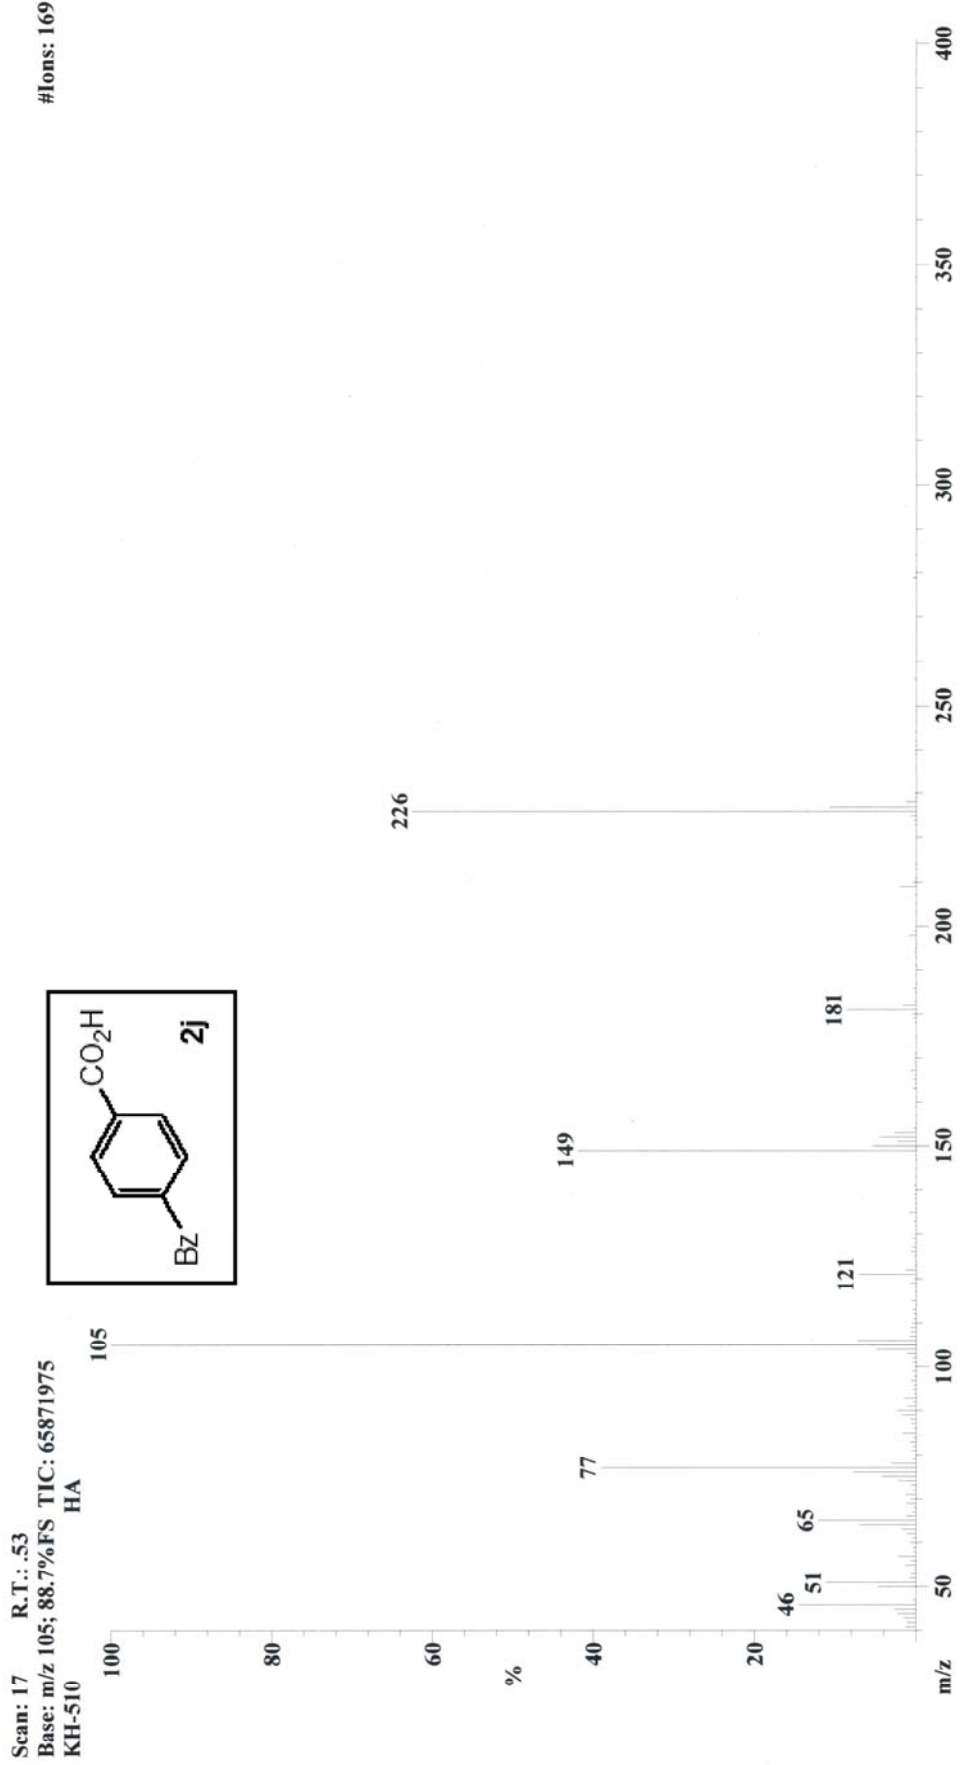

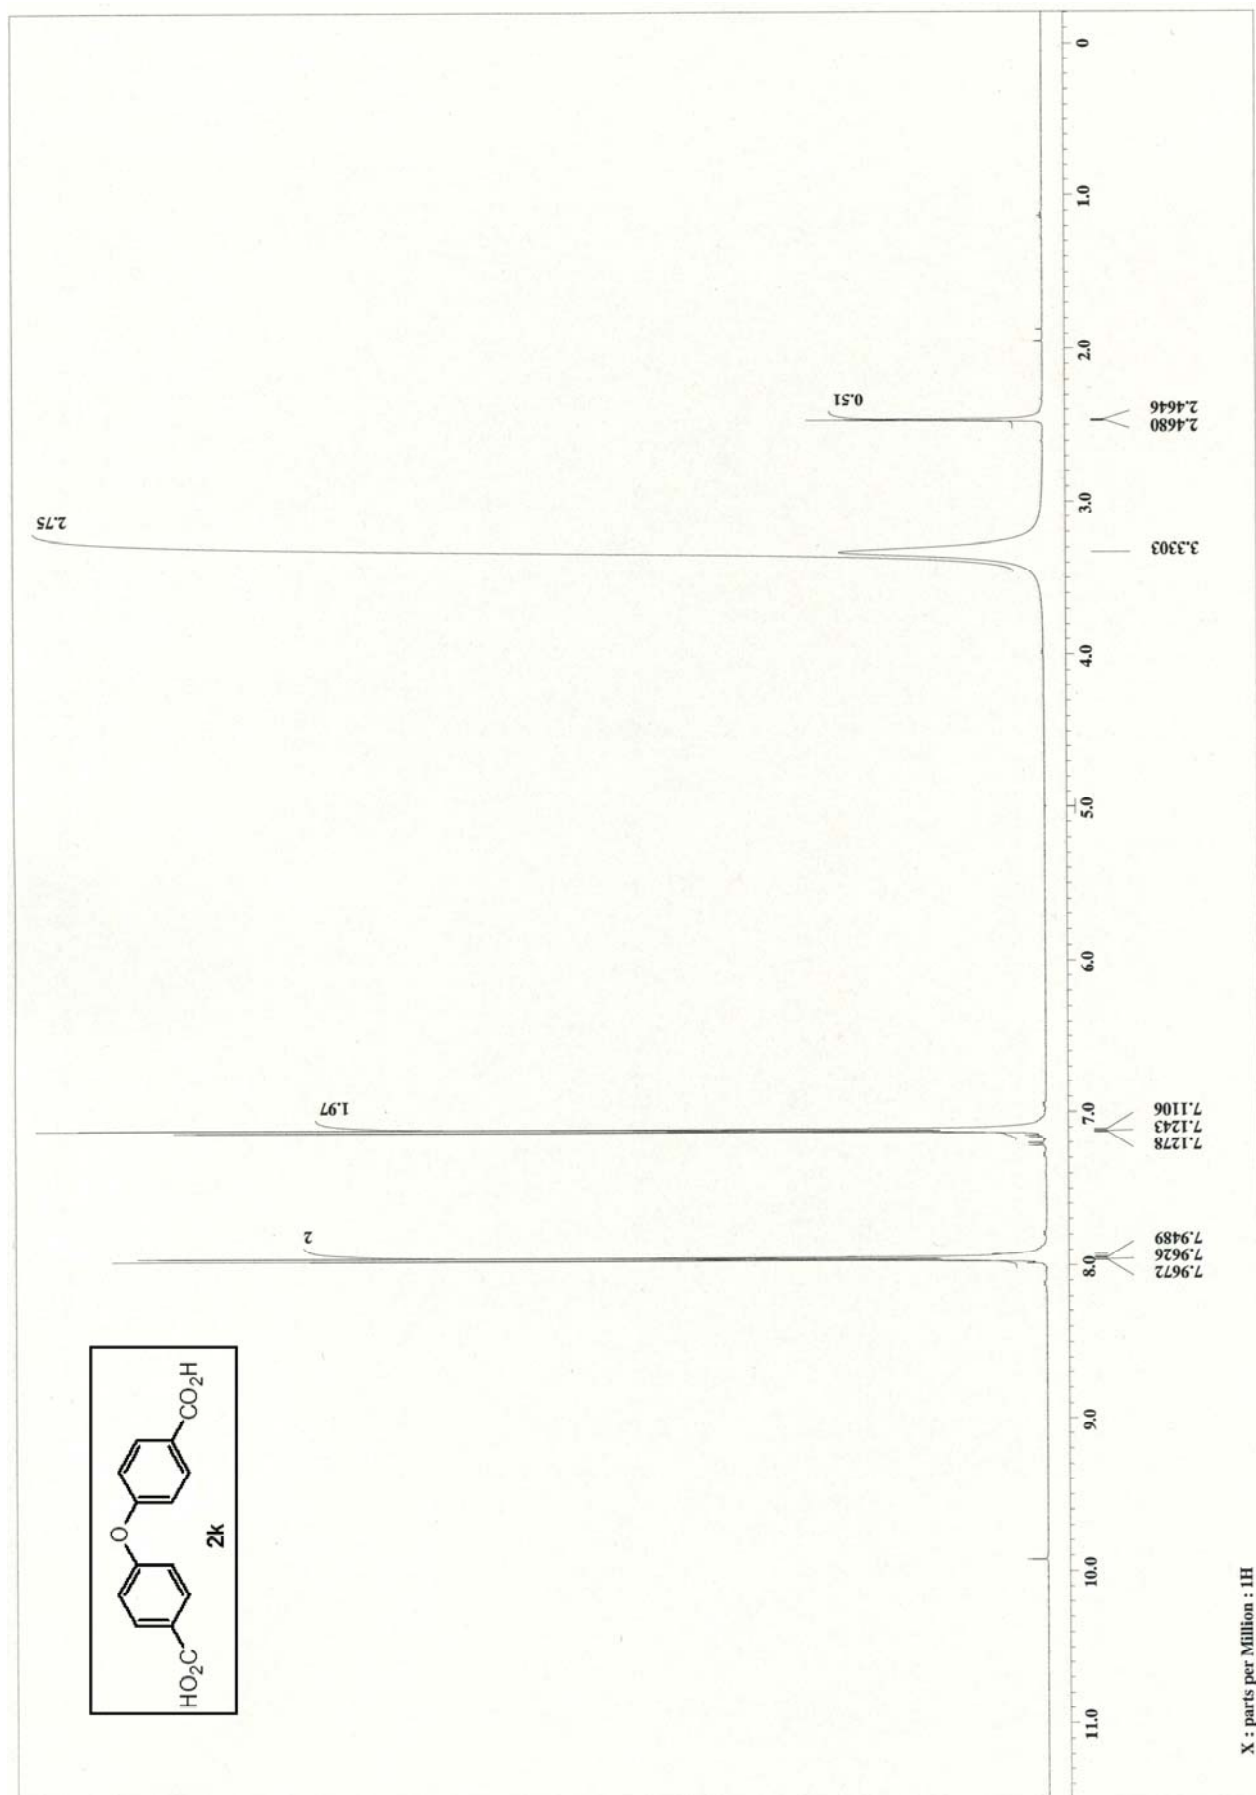



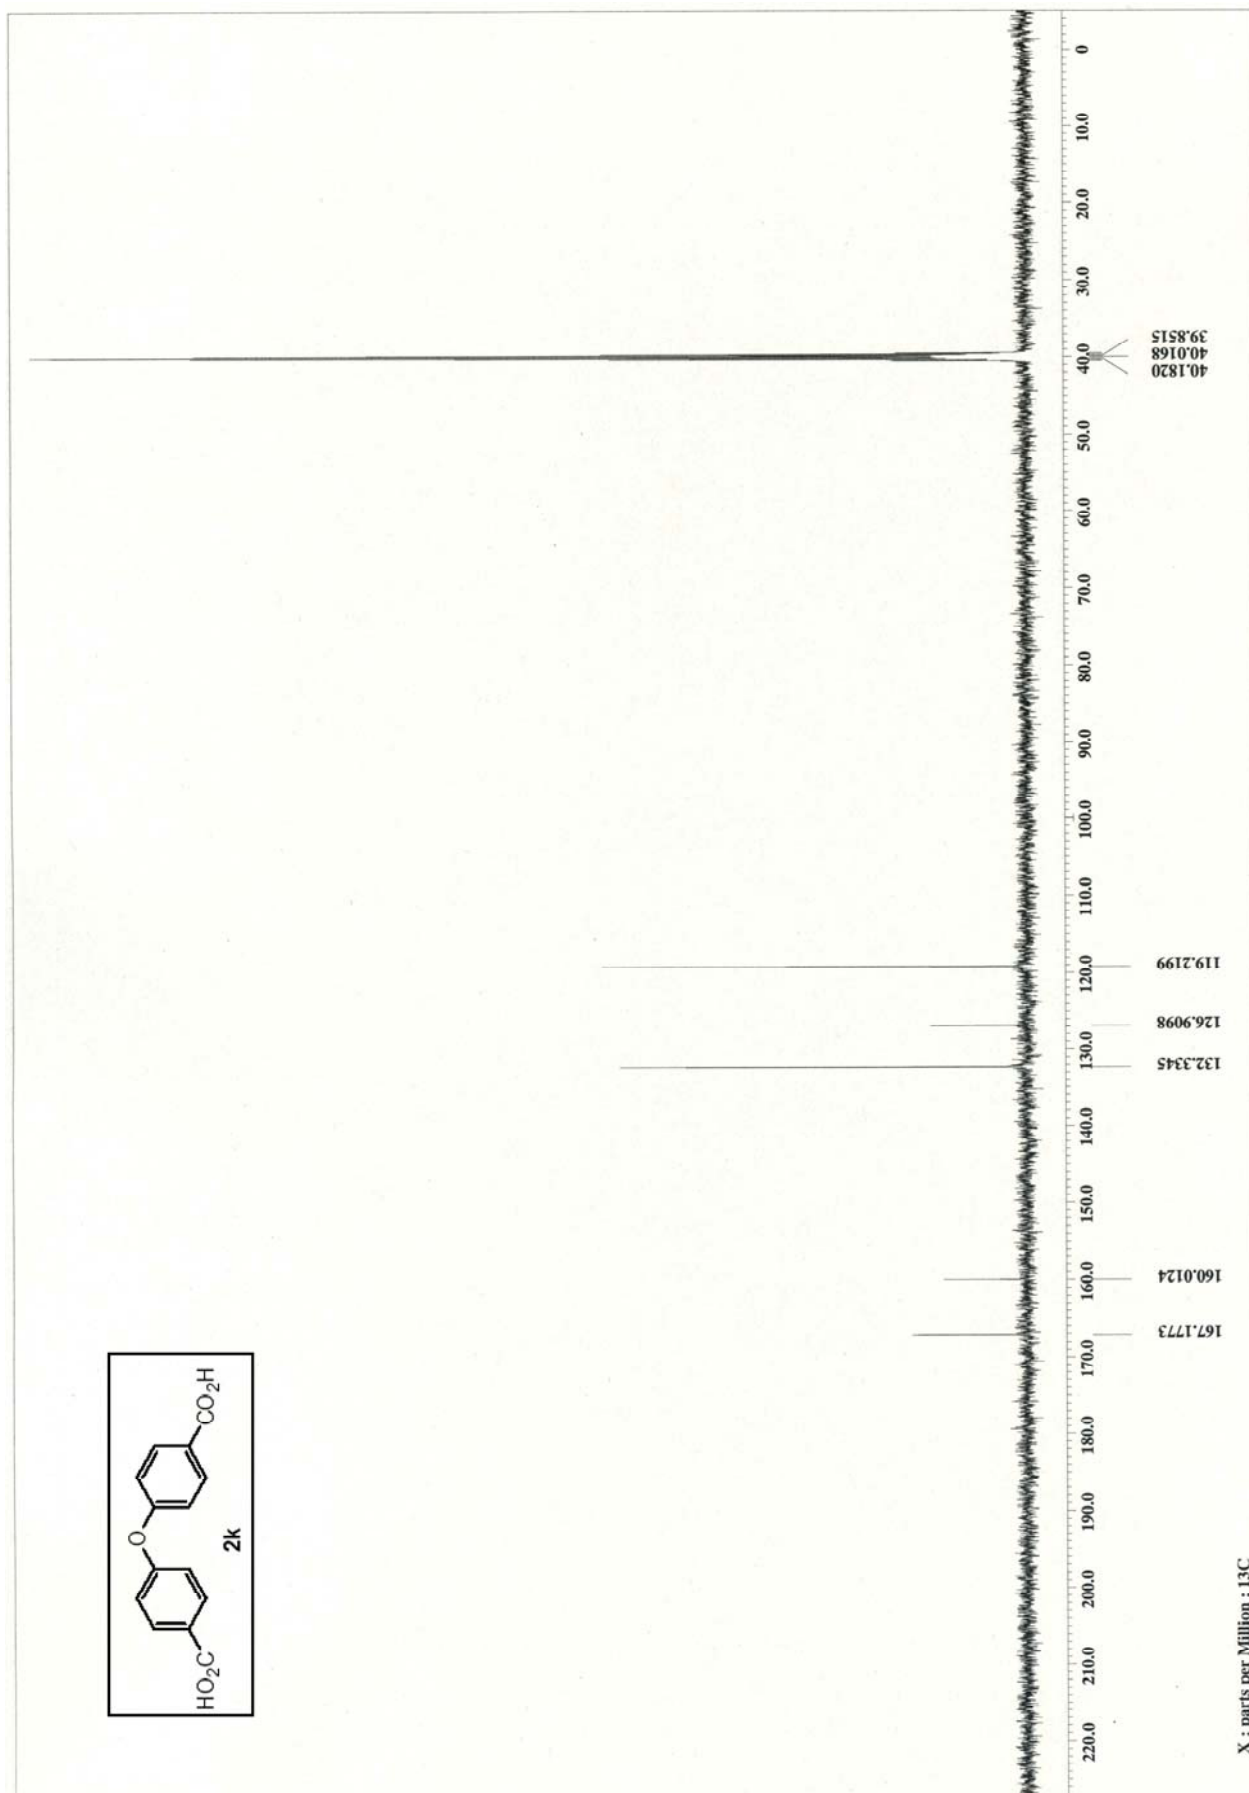

MS/MS

File: LR-10A598  
Instrument: SX102A  
Inlet: Direct

Date Run: 6-9-2010 (Time Run: 17:22:03)  
Ionization mode: EI+

Scan: 63 R.T.: 2.07  
Base: m/z 258; 85.6%FS TIC: 74061390  
KH-988 HA

#Ions: 146

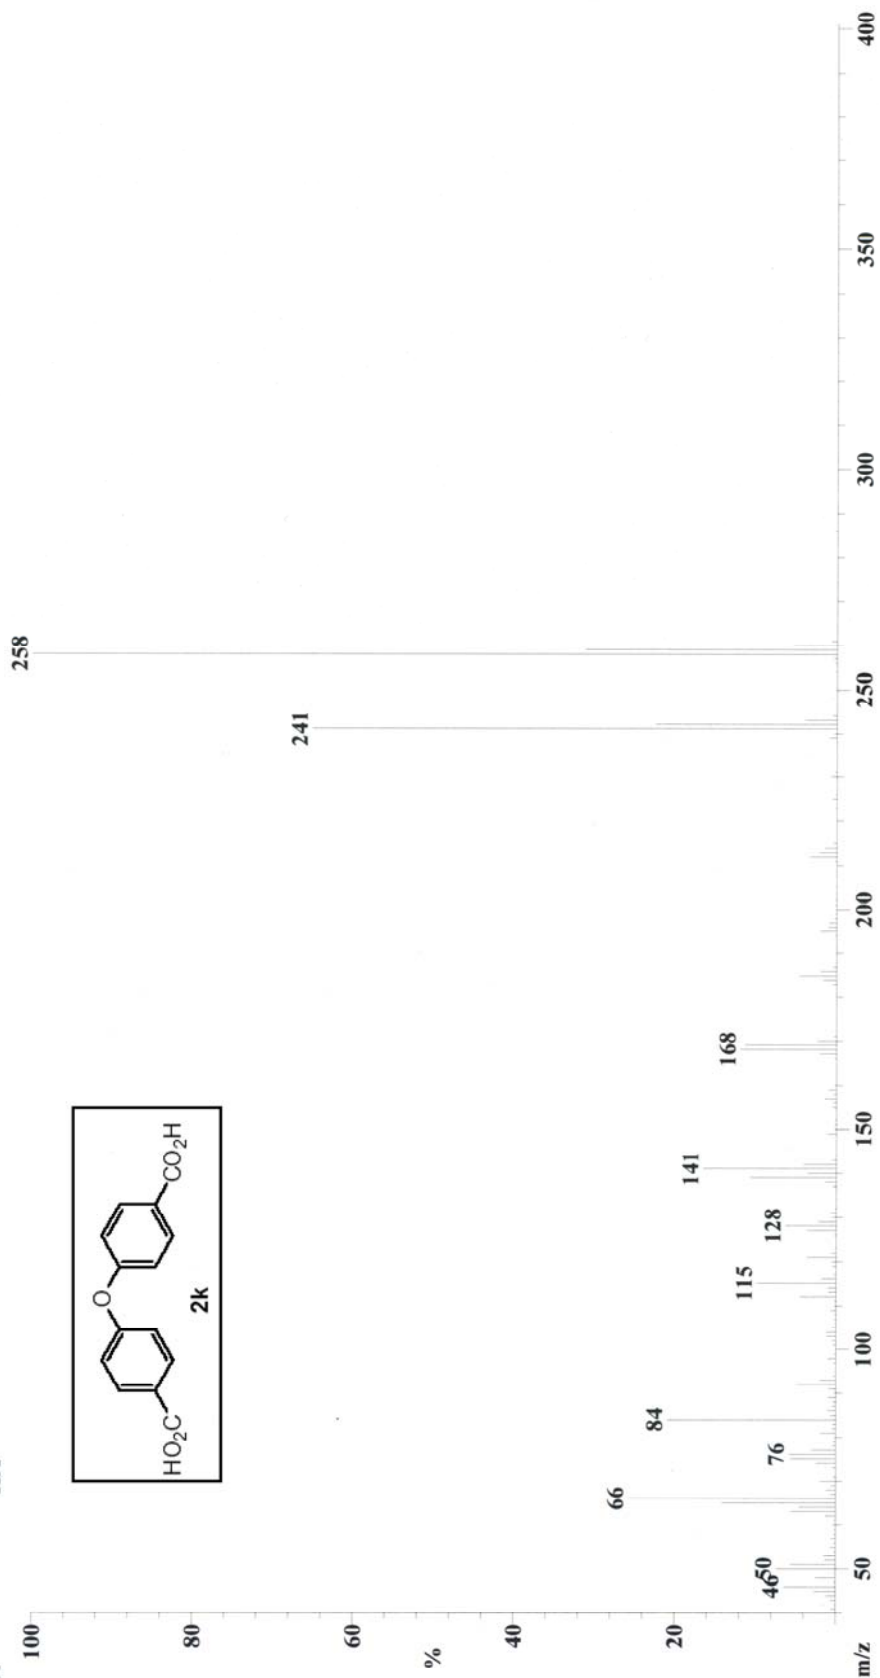

Supplement: c1gc15154a.pdf [file c1gc15154a.pdf]
